# Supplementary material for: GABRB2 Haplotype Association with Heroin Dependence in Chinese Population
Source: PLoS One. 2015 Nov 12;10(11):e0142049. doi: 10.1371/journal.pone.0142049 (PMC4643001; doi:10.1371/journal.pone.0142049)
Supplement: S1 Dataset — (XLSX) [file pone.0142049.s001.xlsx]

## Sheet: Genotype finalized
S1 Dataset. Demographic and genotype information of individuals employed in the study
Sample ID	Sex	Disease status	Markers						Age	Duration of heroin dependence (years)	Status of multiple substance dependence
			S31	S32	S1	S3	S5	S29			Alcohol	Sedative	Euphoriant	Hallucinogen
1	Male	Heroin dependence	A A	N N	G T	A G	C C	T C	26	3	No	No	No	No
4	Male	Heroin dependence	A G	N N	G G	A G	T C	T C	22	4.5	Yes	No	No	Yes
5	Male	Heroin dependence	A A	N N	G G	A A	T C	T T	37	8.75	Yes	No	No	No
9	Male	Heroin dependence	A A	N N	G T	A G	T C	T C	27	3.08333	Yes	Yes	No	No
10	Male	Heroin dependence	A A	N N	G G	A G	T C	T T	32	14.9167	No	No	Yes	Yes
11	Male	Heroin dependence	A A	N N	G T	A G	T C	T C	24	8.5	No	Yes	Yes	Yes
12	Male	Heroin dependence	A A	N N	G G	A A	T T	T T	34	11	Yes	No	No	No
15	Male	Heroin dependence	N N	N N	G G	A A	T T	T T	28	10	No	No	No	No
16	Male	Heroin dependence	A A	N N	G G	A A	T T	T T	27	8	No	No	No	No
17	Male	Heroin dependence	A G	N N	G G	A G	T C	T C	37	14.6667	Yes	Yes	No	No
21	Male	Heroin dependence	A A	N N	G G	A A	T T	T T	32	15.6667	No	No	No	No
23	Male	Heroin dependence	A A	N N	G G	A A	T T	T T	31	13.4167	Yes	Yes	No	No
25	Male	Heroin dependence	A A	N N	G G	A A	T T	T T	35	15.3333	Yes	No	No	No
26	Male	Heroin dependence	N N	N N	G G	A A	T T	T T	36	10.0833	Yes	Yes	No	No
27	Male	Heroin dependence	N N	N N	G G	A A	T T	T T	21	4	No	No	Yes	Yes
29	Male	Heroin dependence	A A	N N	G T	A G	T C	T C	40	1.58333	Yes	No	Yes	Yes
30	Male	Heroin dependence	A A	N N	G T	G G	C C	C C	36	11.75	No	No	No	No
31	Male	Heroin dependence	N N	N N	G G	A G	T C	T C	35	11	No	No	No	No
34	Male	Heroin dependence	A G	N N	G G	A G	C C	T C	38	12.1667	Yes	Yes	No	No
36	Male	Heroin dependence	A A	N N	G G	A A	T T	T T	32	11.6667	Yes	Yes	No	No
38	Male	Heroin dependence	A A	N N	G G	A A	T T	T T	32	12.25	No	Yes	No	No
40	Male	Heroin dependence	A A	N N	G G	A A	T T	T T	27	10.6667	No	No	No	No
41	Male	Heroin dependence	A A	N N	G T	A G	T C	T C	32	7.25	No	No	No	No
42	Male	Heroin dependence	A A	N N	G G	A A	T C	T T	35	11	Yes	No	No	No
43	Male	Heroin dependence	A A	N N	G G	A A	T T	T T	37	13	Yes	No	No	No
44	Male	Heroin dependence	A A	N N	G G	A A	T T	T T	32	12.6667	No	No	No	No
45	Male	Heroin dependence	N N	G G	G T	G G	C C	C C	34	10	No	No	No	No
47	Male	Heroin dependence	A A	N N	G G	A A	T T	T T	47	9.83333	No	No	No	No
48	Male	Heroin dependence	A A	N N	G G	A A	T C	T T	38	11.8333	No	No	No	No
49	Male	Heroin dependence	N N	N N	G T	A G	T C	T C	28	10.5	No	Yes	No	No
50	Male	Heroin dependence	A A	N N	G T	G G	C C	C C	38	1.83333	No	Yes	Yes	No
51	Male	Heroin dependence	A A	N N	G G	A A	T C	T T	33	8.83333	No	Yes	No	No
52	Male	Heroin dependence	A A	N N	G G	A A	T C	T T	27	8.08333	Yes	Yes	Yes	Yes
53	Male	Heroin dependence	A A	N N	G T	A G	T C	T C	26	8.41667	No	Yes	No	No
54	Male	Heroin dependence	A A	N N	G T	A G	T C	T C	24	7.83333	Yes	Yes	No	No
55	Male	Heroin dependence	A A	N N	G G	A A	T T	T T	42	18	Yes	No	Yes	Yes
57	Male	Heroin dependence	A A	N N	G G	A A	T T	T T	35	14	No	No	No	No
58	Male	Heroin dependence	A A	N N	G G	A A	T C	T T	37	16.3333	No	Yes	Yes	Yes
59	Male	Heroin dependence	A A	N N	G G	A A	T T	T T	33	11	No	Yes	No	No
60	Male	Heroin dependence	A A	N N	G G	A A	T C	T T	28	4.16667	No	No	No	No
61	Male	Heroin dependence	A A	N N	G T	A G	T C	T C	33	13.9167	No	No	No	No
62	Male	Heroin dependence	A A	N N	G G	A A	T T	T T	24	4.75	No	Yes	No	No
63	Male	Heroin dependence	A A	N N	G G	A G	T C	T T	49	6.91667	No	No	No	No
64	Male	Heroin dependence	A A	N N	G T	A G	C C	T C	35	15	No	Yes	No	No
65	Male	Heroin dependence	A A	N N	G T	G G	C C	C C	30	10.3333	Yes	No	No	No
67	Male	Heroin dependence	A A	N N	G G	A G	T C	T T	33	12	Yes	No	Yes	Yes
68	Male	Heroin dependence	A A	N N	G T	A G	T C	T C	33	15.0833	No	No	No	No
69	Male	Heroin dependence	A A	N N	G G	A A	T T	T T	26	9.66667	Yes	Yes	No	No
70	Male	Heroin dependence	A A	N N	G G	A A	T T	T T	46	18.8333	No	No	No	No
72	Male	Heroin dependence	A A	N N	G G	A G	T C	T T	28	6	No	No	No	No
74	Male	Heroin dependence	A A	N N	G G	A A	T T	T T	28	10.4167	No	No	No	No
75	Male	Heroin dependence	A A	N N	G T	A G	T C	T C	40	18	No	Yes	No	No
76	Male	Heroin dependence	A A	N N	G G	A A	T T	T T	30	10.1667	No	No	No	No
77	Male	Heroin dependence	A A	N N	G T	A G	T C	T C	42	12	Yes	Yes	No	No
80	Male	Heroin dependence	A A	N N	G G	A A	T T	T T	27	1.83333	No	No	No	No
82	Male	Heroin dependence	A A	N N	G T	G G	C C	T C	35	15.75	No	Yes	No	Yes
83	Male	Heroin dependence	A A	N N	G G	A A	T C	T T	32	8.83333	No	No	No	No
84	Male	Heroin dependence	A A	N N	G G	A A	T T	T T	45	17.25	No	No	No	No
86	Male	Heroin dependence	A A	N N	G G	A A	T C	T T	24	6	No	Yes	No	No
87	Male	Heroin dependence	A A	N N	G G	A A	T T	T T	32	17.3333	No	No	No	No
88	Male	Heroin dependence	A A	N N	T T	G G	C C	C C	33	15.6667	No	No	No	No
92	Male	Heroin dependence	A A	N N	G G	A A	T T	T T	33	9.66667	No	No	No	No
93	Male	Heroin dependence	A A	N N	G T	A G	T C	T C	29	10.9167	No	No	No	No
94	Male	Heroin dependence	A A	N N	G G	A A	T C	T T	27	5	No	No	No	No
95	Male	Heroin dependence	A A	N N	G T	A G	T C	T C	40	16.25	No	Yes	No	No
96	Male	Heroin dependence	A A	N N	G G	A A	T T	T T	30	11.6667	Yes	No	No	No
103	Male	Heroin dependence	A G	N N	G T	G G	C C	C C	30	12	No	No	No	No
104	Male	Heroin dependence	A A	N N	G T	A G	T C	T C	40	12	No	No	No	No
105	Male	Heroin dependence	N N	N N	G G	A A	T C	T T	25	9	No	No	No	No
114	Male	Heroin dependence	A A	N N	G T	A G	T C	T C	50	17.75	No	No	No	No
115	Male	Heroin dependence	A A	N N	G G	A A	T T	T T	33	10.8333	No	No	No	No
116	Male	Heroin dependence	A A	N N	G G	A A	T T	T T	31	15.4167	Yes	Yes	Yes	Yes
117	Male	Heroin dependence	A A	N N	G T	A G	T C	T C	27	10	No	Yes	No	No
122	Male	Heroin dependence	A A	N N	G T	A G	T C	T C	28	6.91667	No	No	No	No
123	Male	Heroin dependence	A A	N N	G T	A G	C C	T T	41	16	No	Yes	No	No
124	Male	Heroin dependence	A A	G G	G T	A G	T C	T C	37	4	No	No	No	No
125	Male	Heroin dependence	N N	N N	G G	A A	T T	T T	34	12.1667	No	Yes	No	No
126	Male	Heroin dependence	N N	G G	G G	A G	T C	T T	31	12.4167	No	No	No	No
128	Male	Heroin dependence	N N	N N	G G	A A	T C	T T	37	10.4167	No	No	No	No
129	Male	Heroin dependence	N N	N N	G T	A G	T C	T C	31	8	No	No	No	No
130	Male	Heroin dependence	A A	N N	G G	A G	T C	T T	25	8.91667	No	No	Yes	No
131	Male	Heroin dependence	A A	N N	G G	A G	T C	T C	24	4.5	No	No	No	No
132	Male	Heroin dependence	A A	N N	G G	A A	T T	T T	36	0.916667	No	Yes	No	No
133	Male	Heroin dependence	N N	N N	G G	A G	T C	T T	51	4	No	No	No	No
135	Male	Heroin dependence	N N	G G	G T	A G	T C	T C	44	9.83333	No	Yes	No	No
137	Male	Heroin dependence	N N	N N	G G	A A	C C	T T	38	12.1667	No	Yes	No	No
138	Male	Heroin dependence	N N	N N	G G	A G	T C	T T	25	10.1667	Yes	Yes	Yes	Yes
139	Male	Heroin dependence	N N	N N	G T	A G	T C	T C	23	5.25	No	Yes	No	No
140	Male	Heroin dependence	N N	N N	G T	A G	T C	T C	37	11.8333	No	Yes	No	No
142	Male	Heroin dependence	N N	N N	G G	A G	T C	T T	23	4.5	No	No	No	No
144	Male	Heroin dependence	N N	G G	G G	G G	C C	C C	27	7.91667	No	No	No	No
145	Male	Heroin dependence	N N	G A	G G	A A	T T	T T	41	12.0833	No	No	No	Yes
146	Male	Heroin dependence	N N	N N	G G	A A	T T	T T	40	13	Yes	Yes	No	No
147	Male	Heroin dependence	N N	N N	G G	A A	T T	T C	31	9.5	No	No	No	No
149	Male	Heroin dependence	N N	N N	G G	A A	T T	T T	26	4.41667	Yes	No	No	No
150	Male	Heroin dependence	N N	G G	G G	A A	T C	T T	25	6	Yes	No	No	No
151	Male	Heroin dependence	N N	G G	G G	A A	T T	T T	48	12	No	No	Yes	Yes
152	Male	Heroin dependence	N N	G G	G T	A G	C C	T C	41	19.4167	No	No	Yes	Yes
159	Male	Heroin dependence	N N	A A	G G	A A	T T	T T	38	14	No	Yes	No	No
161	Male	Heroin dependence	N N	N N	G G	A A	T C	T T	28	9.75	No	No	No	No
162	Male	Heroin dependence	N N	G A	G G	A A	T C	T T	41	13.75	Yes	Yes	No	No
163	Male	Heroin dependence	N N	G G	G G	A A	T T	T T	37	19	Yes	Yes	No	No
166	Male	Heroin dependence	N N	G G	G G	A G	T C	T T	28	8.33333	No	Yes	No	No
167	Male	Heroin dependence	N N	N N	G T	A G	T C	T C	34	8.83333	Yes	Yes	Yes	No
168	Male	Heroin dependence	N N	N N	G G	A A	T T	T T	39	12	Yes	No	No	No
169	Male	Heroin dependence	N N	N N	G G	A A	T T	T T	41	11.25	No	No	No	No
170	Male	Heroin dependence	N N	N N	G G	A A	T T	T T	27	6.16667	No	No	No	No
171	Male	Heroin dependence	A A	G G	G T	A G	T C	T C	24	10.25	Yes	No	No	No
173	Male	Heroin dependence	N N	G G	G G	A A	T C	T T	34	5.91667	Yes	No	No	No
176	Male	Heroin dependence	N N	N N	G G	A A	T T	T C	21	2.66667	No	No	No	No
177	Male	Heroin dependence	N N	N N	G G	A A	T T	T C	31	5.66667	Yes	Yes	Yes	No
178	Male	Heroin dependence	A A	G G	G G	A A	T T	T C	37	11.0833	Yes	Yes	No	No
179	Male	Heroin dependence	N N	N N	G T	A G	T C	T C	28	11	No	Yes	No	No
181	Male	Heroin dependence	N N	N N	G G	A A	T T	T T	42	13.5833	No	Yes	No	No
183	Male	Heroin dependence	N N	G G	G G	A A	T T	T T	38	15.6667	Yes	No	No	No
184	Male	Heroin dependence	N N	G G	G G	A A	T T	T T	26	8.25	No	Yes	Yes	Yes
185	Male	Heroin dependence	N N	G G	G G	A A	T T	T T	27	7.75	No	No	No	No
186	Male	Heroin dependence	N N	N N	G G	A A	T T	T T	24	4.83333	No	No	No	No
187	Male	Heroin dependence	N N	N N	G T	A G	T C	T C	21	3.08333	Yes	Yes	No	No
189	Male	Heroin dependence	N N	N N	G T	G G	C C	T C	39	7	No	Yes	No	No
193	Male	Heroin dependence	N N	N N	G G	A A	T T	T T	34	14.0833	No	Yes	No	No
195	Male	Heroin dependence	A A	G G	G G	A A	T T	T C	33	14	No	Yes	No	No
196	Male	Heroin dependence	N N	G G	G T	G G	C C	C C	34	5.16667	Yes	Yes	No	No
197	Male	Heroin dependence	A A	G G	G G	A A	T T	T T	46	9.83333	No	No	No	No
198	Male	Heroin dependence	N N	G G	G G	A G	T C	T C	32	11.8333	No	Yes	No	No
199	Male	Heroin dependence	N N	G G	G G	A A	T T	T T	38	5.25	No	No	No	No
200	Male	Heroin dependence	N N	G A	G G	A G	T C	T T	28	5	No	No	No	Yes
201	Male	Heroin dependence	N N	G A	G T	A G	T C	T C	31	13	No	No	No	No
202	Male	Heroin dependence	N N	G G	G G	A A	T T	T T	25	8	Yes	No	No	No
209	Male	Heroin dependence	N N	N N	G G	A A	T C	T T	31	12.75	Yes	Yes	No	No
210	Male	Heroin dependence	N N	N N	G G	A A	T T	T C	32	10.25	Yes	Yes	No	No
211	Male	Heroin dependence	N N	N N	G G	A G	T C	T T	42	18.1667	No	No	Yes	Yes
212	Male	Heroin dependence	N N	G G	G G	A A	T T	T T	26	6.25	No	No	No	No
218	Male	Heroin dependence	N N	G A	G G	A A	T T	T T	38	11.3333	No	No	No	No
219	Male	Heroin dependence	N N	G G	G T	G G	C C	T C	42	13	No	No	No	No
220	Male	Heroin dependence	N N	N N	G G	A G	T C	C C	33	11	No	Yes	No	No
221	Male	Heroin dependence	N N	N N	G G	A A	C C	T T	45	17.3333	Yes	No	No	No
226	Male	Heroin dependence	N N	G G	G G	A A	T T	T T	32	10.1667	No	Yes	No	No
227	Male	Heroin dependence	N N	N N	G G	A A	T C	T T	21	3.83333	No	No	Yes	Yes
229	Male	Heroin dependence	N N	G G	G G	G G	C C	C C	29	7.83333	No	Yes	No	No
230	Male	Heroin dependence	N N	N N	G G	A G	T C	T T	33	1.5	No	No	No	No
236	Male	Heroin dependence	N N	N N	G G	A A	T T	T T	50	16	No	No	No	No
239	Male	Heroin dependence	A A	N N	G G	A A	T C	T T	36	8.91667	No	Yes	No	No
240	Male	Heroin dependence	A A	N N	G G	A A	T T	T T	29	12.4167	No	Yes	No	No
241	Male	Heroin dependence	A A	N N	G G	A A	T T	T T	33	13.0833	Yes	Yes	Yes	No
243	Male	Heroin dependence	A A	N N	G G	A A	T T	T T	21	6.08333	No	Yes	No	No
244	Male	Heroin dependence	A A	N N	G G	A A	T C	T T	25	6	Yes	No	No	No
245	Male	Heroin dependence	A A	N N	G G	A G	T C	T T	38	16.75	No	No	No	No
247	Male	Heroin dependence	A A	N N	G G	A A	T T	T T	38	11.9167	No	No	No	No
248	Male	Heroin dependence	A A	N N	G G	A A	T T	T T	49	12.9167	No	Yes	No	No
249	Male	Heroin dependence	A A	N N	G G	A G	T C	T T	34	11	Yes	No	No	No
250	Male	Heroin dependence	A A	N N	G T	A G	T C	T C	40	16	Yes	No	No	No
251	Male	Heroin dependence	A A	N N	G G	A A	T T	T T	24	5.08333	No	Yes	No	No
252	Male	Heroin dependence	A A	N N	G T	G G	C C	T C	31	12.0833	No	No	No	No
253	Male	Heroin dependence	A A	N N	G G	A A	T T	T T	32	4	No	No	No	No
254	Male	Heroin dependence	A A	N N	G T	A G	T C	T C	25	8	No	No	No	No
255	Male	Heroin dependence	A A	N N	G T	A G	T C	T C	34	7.83333	Yes	No	No	No
256	Male	Heroin dependence	A A	N N	G G	A A	T C	T T	29	7.25	No	No	No	No
258	Male	Heroin dependence	A A	N N	G G	A A	T T	T T	35	2.33333	No	No	No	No
259	Male	Heroin dependence	A A	N N	G G	A A	T T	T T	43	16.25	No	No	No	No
260	Male	Heroin dependence	A G	N N	G T	G G	C C	C C	36	9.66667	No	No	No	No
261	Male	Heroin dependence	N N	N N	G G	A A	T C	T T	33	16	No	No	No	No
262	Male	Heroin dependence	A A	N N	G G	A A	T T	T T	36	16	No	Yes	No	No
264	Male	Heroin dependence	A A	N N	G G	A A	T T	T T	28	10	Yes	Yes	No	No
266	Male	Heroin dependence	A A	N N	G G	A A	T C	T T	29	8.75	No	No	No	No
267	Male	Heroin dependence	A A	N N	G G	A A	T C	T T	25	9.08333	No	No	No	No
268	Male	Heroin dependence	A A	N N	G G	A A	T T	T T	36	10	Yes	No	No	No
270	Male	Heroin dependence	A A	N N	G T	A G	T C	T C	37	2.16667	No	No	No	No
271	Male	Heroin dependence	A A	N N	G T	A G	T C	T C	36	9.16667	Yes	No	No	No
272	Male	Heroin dependence	A A	N N	G G	A A	T T	T T	28	8.33333	No	Yes	No	No
273	Male	Heroin dependence	A A	N N	G G	A A	T T	T T	25	9.25	No	Yes	Yes	No
274	Male	Heroin dependence	A A	N N	G G	A A	T T	T T	44	6.25	No	No	No	No
275	Male	Heroin dependence	A A	N N	G G	A A	T T	T T	22	0.333333	Yes	No	Yes	Yes
276	Male	Heroin dependence	A A	N N	T T	G G	C C	C C	39	13.0833	No	No	No	No
277	Male	Heroin dependence	A A	N N	G T	A G	T C	T C	31	2.58333	No	No	No	No
281	Male	Heroin dependence	A A	N N	G G	A A	T T	T T	23	2.16667	No	Yes	No	No
282	Male	Heroin dependence	A A	N N	G G	A A	T T	T T	37	12	No	No	No	No
283	Male	Heroin dependence	A A	N N	G G	A A	T T	T T	21	0.416667	Yes	No	No	No
284	Male	Heroin dependence	A A	N N	G G	A A	T T	T C	38	9.58333	No	Yes	Yes	Yes
286	Male	Heroin dependence	A A	N N	G G	A A	T T	T T	26	11	No	No	No	No
287	Male	Heroin dependence	A A	N N	G G	A A	T C	T T	39	7.75	No	No	No	No
288	Male	Heroin dependence	A A	N N	G G	A A	T T	T T	32	8.83333	No	No	No	No
290	Male	Heroin dependence	A A	N N	G G	A A	T T	T T	30	10.5	Yes	No	No	No
291	Male	Heroin dependence	A A	N N	G G	A G	T C	T T	23	3.83333	No	No	No	Yes
292	Male	Heroin dependence	N N	N N	G G	A G	T C	T T	29	4.83333	No	No	No	No
293	Male	Heroin dependence	A A	G G	G G	A G	T C	T T	26	9.91667	No	No	Yes	Yes
294	Male	Heroin dependence	A A	N N	G T	A G	T C	T C	32	3.16667	No	No	No	No
295	Male	Heroin dependence	A A	N N	G G	A G	C C	T T	34	5	No	No	No	No
296	Male	Heroin dependence	A A	N N	G G	A A	T T	T T	43	19.75	Yes	No	Yes	Yes
297	Male	Heroin dependence	A A	N N	G G	A G	T C	T T	25	8.16667	No	No	No	No
299	Male	Heroin dependence	A A	N N	G G	A G	T C	T T	30	11	Yes	No	Yes	No
302	Male	Heroin dependence	A A	N N	G G	A A	T C	T T	26	10	No	No	No	No
305	Male	Heroin dependence	A A	N N	G G	A A	T T	T T	41	15	No	No	No	No
307	Male	Heroin dependence	A A	N N	G G	A A	T T	T T	23	3	No	No	No	No
308	Male	Heroin dependence	A A	N N	G T	A G	T C	T C	35	17.25	No	No	No	Yes
309	Male	Heroin dependence	A A	N N	G G	A A	T C	T T	59	18.0833	No	No	No	No
311	Male	Heroin dependence	A A	N N	G T	A G	T C	T C	34	2.58333	No	No	No	No
312	Male	Heroin dependence	A A	N N	G G	A A	T T	T T	32	13	No	No	No	No
314	Male	Heroin dependence	A A	N N	G G	A A	T T	T T	36	12	Yes	Yes	No	No
317	Male	Heroin dependence	N N	N N	G G	A A	T T	T T	27	8.16667	No	No	No	No
318	Male	Heroin dependence	A A	N N	G G	A G	T C	T T	44	19	Yes	No	No	No
319	Male	Heroin dependence	A A	N N	G G	A A	T T	T T	23	4.08333	Yes	Yes	No	No
320	Male	Heroin dependence	A A	N N	G T	A G	T C	T C	30	10.25	No	Yes	No	No
322	Male	Heroin dependence	A A	N N	G G	A A	T T	T T	38	13.3333	No	Yes	No	No
323	Male	Heroin dependence	A A	N N	G G	A A	C C	T T	32	12	No	No	No	No
324	Male	Heroin dependence	A A	N N	T T	G G	C C	C C	24	8.41667	No	Yes	No	No
325	Male	Heroin dependence	A A	N N	G G	A A	T C	T T	29	10.1667	No	Yes	No	No
326	Male	Heroin dependence	A A	N N	G G	A A	T T	T T	40	17.9167	Yes	Yes	No	No
327	Male	Heroin dependence	A A	N N	G G	A A	T C	T T	46	19.75	No	No	No	No
328	Male	Heroin dependence	A G	N N	G G	A G	T C	T C	27	8.58333	Yes	Yes	No	No
329	Male	Heroin dependence	A A	N N	G G	A A	T C	T T	29	7.08333	No	No	No	No
330	Male	Heroin dependence	A A	N N	G T	A G	T C	T C	35	11	No	No	No	No
335	Male	Heroin dependence	A G	N N	G G	A A	T T	T T	27	4.5	No	Yes	No	No
336	Male	Heroin dependence	A G	N N	G G	A G	C C	T C	32	16	Yes	No	No	No
337	Male	Heroin dependence	A A	N N	G G	A A	T C	T T	36	16.0833	Yes	Yes	Yes	Yes
338	Male	Heroin dependence	A G	N N	G G	A G	T C	T C	47	13.25	Yes	Yes	No	No
339	Male	Heroin dependence	A G	N N	G T	A G	T C	T C	27	9.75	Yes	No	No	No
340	Male	Heroin dependence	A A	N N	G G	A A	T T	T T	36	15.75	Yes	No	No	No
342	Male	Heroin dependence	A A	N N	G G	A A	T T	T T	43	10.0833	No	Yes	No	No
343	Male	Heroin dependence	A A	N N	G G	A A	T T	T T	54	16	Yes	No	No	No
344	Male	Heroin dependence	A G	N N	G G	A G	T T	T C	46	19	No	No	No	No
345	Male	Heroin dependence	A G	N N	G G	A G	T C	T C	34	16	No	No	Yes	No
346	Male	Heroin dependence	A A	N N	G G	A G	T C	T T	32	11.0833	No	Yes	No	No
348	Male	Heroin dependence	A A	N N	G G	A A	T T	T T	44	18.5833	No	No	No	No
349	Male	Heroin dependence	A A	N N	G G	A A	T C	T T	38	3.91667	Yes	No	No	No
350	Male	Heroin dependence	A G	N N	G G	A G	T C	T C	32	4.83333	No	No	No	No
351	Male	Heroin dependence	A A	N N	G G	A A	T T	T T	29	9.75	No	Yes	No	No
352	Male	Heroin dependence	A A	N N	G G	A A	T T	T T	30	3.16667	Yes	No	No	No
354	Male	Heroin dependence	A A	N N	G T	A G	C C	T C	43	9.91667	No	No	No	No
356	Male	Heroin dependence	A A	N N	G G	A G	T C	T T	26	10.8333	No	No	No	No
357	Male	Heroin dependence	A A	N N	G G	A A	T C	T C	20	4	No	Yes	Yes	Yes
358	Male	Heroin dependence	A A	N N	G G	A A	T T	T C	24	5	No	Yes	No	Yes
359	Male	Heroin dependence	A A	N N	G T	A G	T C	T C	47	1.91667	Yes	No	Yes	Yes
360	Male	Heroin dependence	A A	N N	G G	A A	T C	C C	38	18.6667	No	No	No	No
361	Male	Heroin dependence	A A	N N	G G	A A	T T	T T	31	11.0833	No	Yes	No	No
362	Male	Heroin dependence	A A	N N	G G	A G	T C	T T	30	11.0833	No	Yes	No	Yes
363	Male	Heroin dependence	A A	N N	G T	A G	T C	T C	29	7.83333	No	No	No	No
365	Male	Heroin dependence	A A	G G	G G	A A	T T	C C	28	10	Yes	No	No	No
366	Male	Heroin dependence	A A	N N	G G	A A	T T	T T	33	15	Yes	No	Yes	Yes
367	Male	Heroin dependence	A A	N N	G G	A A	T T	T T	25	8	No	No	Yes	Yes
368	Male	Heroin dependence	A A	N N	G T	A G	T C	T T	27	8.83333	No	No	No	No
369	Male	Heroin dependence	A A	G G	G T	A G	T C	T T	29	9	No	No	No	No
371	Male	Heroin dependence	A A	N N	G T	A G	T C	T T	33	12	Yes	No	No	No
373	Male	Heroin dependence	A A	G A	G T	A G	T C	T T	33	10.75	Yes	Yes	No	Yes
374	Male	Heroin dependence	A A	N N	G G	A G	T C	C C	29	8	Yes	No	No	Yes
377	Male	Heroin dependence	A A	G G	G T	A G	T C	T T	33	11	No	Yes	Yes	No
378	Male	Heroin dependence	A A	N N	G G	A G	T C	T T	30	4.25	No	Yes	No	No
379	Male	Heroin dependence	A A	G G	G G	A A	T C	T T	38	10	No	No	No	No
380	Male	Heroin dependence	A A	N N	G T	A G	T C	T T	36	12.25	Yes	No	Yes	No
382	Male	Heroin dependence	A A	N N	G G	A A	T C	T T	47	18	Yes	No	No	No
383	Male	Heroin dependence	A A	G A	G G	A A	T T	T T	33	6.33333	Yes	No	No	No
384	Male	Heroin dependence	A A	N N	G G	A A	T C	T T	27	6	Yes	No	Yes	Yes
385	Male	Heroin dependence	A A	N N	G T	A G	T C	T T	40	1.83333	No	No	No	No
386	Male	Heroin dependence	A A	G G	G G	A A	C C	T T	24	6.58333	No	No	No	No
387	Male	Heroin dependence	N N	G A	G G	A A	T T	T T	33	8.08333	Yes	Yes	No	No
388	Male	Heroin dependence	A A	G A	G G	A A	T T	T C	26	10	No	Yes	No	No
390	Male	Heroin dependence	A G	G G	G G	A G	T C	T C	29	8.66667	No	Yes	No	No
391	Male	Heroin dependence	A A	G G	G G	A A	T T	T T	36	7.41667	No	Yes	No	No
393	Male	Heroin dependence	A A	G A	G T	A G	T C	T T	38	13	Yes	No	No	No
394	Male	Heroin dependence	A A	G A	G G	A A	T C	T T	32	15.0833	No	Yes	No	No
397	Male	Heroin dependence	A G	N N	G G	A G	T C	T T	30	8.33333	No	No	No	No
398	Male	Heroin dependence	N N	G G	G G	A A	T T	T C	28	11.4167	Yes	Yes	No	No
399	Male	Heroin dependence	A G	G G	G G	A G	T C	T T	49	17.5	Yes	No	No	No
400	Male	Heroin dependence	A A	N N	G G	A A	T T	T T	36	14.5833	No	Yes	No	No
402	Male	Heroin dependence	A A	N N	G T	G G	C C	T T	37	14.75	Yes	Yes	No	No
405	Male	Heroin dependence	A A	G G	G T	A G	C C	T T	47	11.5833	No	No	No	No
406	Male	Heroin dependence	A A	N N	G G	A G	T C	T C	43	12	No	Yes	No	No
408	Male	Heroin dependence	A G	G G	G G	A G	T C	T T	35	5.08333	No	Yes	Yes	No
411	Male	Heroin dependence	A A	G A	G T	A G	T C	T C	23	7	No	No	Yes	No
412	Male	Heroin dependence	A A	G G	G G	A G	T C	T T	44	8.33333	Yes	No	No	No
417	Male	Heroin dependence	A A	G A	G G	A A	T T	T T	26	7.66667	No	No	Yes	Yes
420	Male	Heroin dependence	A A	N N	G G	A G	T C	T T	34	11	No	No	No	No
421	Male	Heroin dependence	A A	G G	G G	A A	C C	T C	48	11	No	No	No	No
422	Male	Heroin dependence	A A	G G	G T	A G	T C	T T	42	4	No	No	No	No
424	Male	Heroin dependence	A A	G A	G G	A G	T C	T T	28	5.75	No	No	No	No
425	Male	Heroin dependence	A A	G G	G T	A G	T C	T T	45	14.5833	Yes	No	No	No
426	Male	Heroin dependence	A A	N N	G G	A A	T T	T T	42	16	No	No	No	No
427	Male	Heroin dependence	N N	N N	G T	A G	C C	T T	35	12	Yes	No	Yes	Yes
428	Male	Heroin dependence	A G	G A	G G	A G	T C	T C	22	2	No	No	No	No
430	Male	Heroin dependence	N N	G G	G G	A A	T C	T T	45	17	No	No	No	No
431	Male	Heroin dependence	A A	G G	G T	G G	C C	T C	36	18.1667	Yes	Yes	Yes	Yes
432	Male	Heroin dependence	A A	G G	G G	A A	T T	T C	30	3.83333	No	No	No	No
433	Male	Heroin dependence	A A	G G	G T	A G	T C	T T	31	11	No	Yes	No	No
434	Male	Heroin dependence	A A	N N	G T	A G	T C	T T	30	9	No	Yes	No	No
435	Male	Heroin dependence	N N	G G	G T	A G	T C	T T	34	14	Yes	Yes	No	No
438	Male	Heroin dependence	A A	G G	G G	A A	T T	T T	30	12.5	Yes	No	No	No
440	Male	Heroin dependence	A A	G A	G G	A G	T C	T T	29	9.16667	No	No	No	No
441	Male	Heroin dependence	A A	G G	G T	A G	T C	T C	33	16.5833	No	No	Yes	Yes
442	Male	Heroin dependence	A A	G G	G G	A A	T T	T T	40	10.4167	Yes	No	Yes	Yes
443	Male	Heroin dependence	A A	G G	T T	G G	C C	T T	26	0.916667	Yes	No	No	No
444	Male	Heroin dependence	A A	N N	T T	G G	C C	T T	44	15	Yes	No	No	No
445	Male	Heroin dependence	N N	N N	G G	A A	T T	T C	31	15.5	Yes	Yes	Yes	Yes
446	Male	Heroin dependence	A A	G A	G G	A A	T T	T T	26	6	No	No	No	No
447	Male	Heroin dependence	A A	G G	G G	A A	T T	T T	27	10.0833	No	No	No	No
449	Male	Heroin dependence	A G	G G	G G	G G	C C	T T	28	4	No	No	No	No
450	Male	Heroin dependence	A A	G G	G G	A G	T C	T C	34	5	No	Yes	No	No
453	Male	Heroin dependence	A A	G G	G T	A G	C C	T C	46	14	No	No	No	No
455	Male	Heroin dependence	N N	N N	G G	A A	T T	T T	40	18	No	No	No	No
457	Male	Heroin dependence	A A	G A	G G	A A	T T	T C	27	12.1667	Yes	No	Yes	No
459	Male	Heroin dependence	A G	G G	G T	G G	C C	T T	29	8.83333	No	No	Yes	No
460	Male	Heroin dependence	A A	G G	G G	A A	T C	T C	31	5.66667	No	No	No	No
461	Male	Heroin dependence	A A	N N	G G	A A	T T	T T	25	8.66667	No	Yes	No	No
462	Male	Heroin dependence	A A	N N	G G	A A	T T	T C	36	13.6667	No	No	No	No
463	Male	Heroin dependence	A A	N N	G T	A G	T C	T T	38	14.6667	Yes	No	No	No
464	Male	Heroin dependence	N N	N N	G G	A G	T C	T T	37	16.75	No	No	Yes	Yes
466	Male	Heroin dependence	A A	G G	G G	A A	T C	T C	34	9.16667	Yes	Yes	No	No
470	Male	Heroin dependence	A A	N N	G T	A G	T C	T C	37	11.6667	No	No	No	No
471	Male	Heroin dependence	N N	N N	G G	A A	T T	T T	41	20	No	No	No	No
474	Male	Heroin dependence	N N	N N	G G	A A	T T	T T	38	19	Yes	No	No	No
476	Male	Heroin dependence	A A	N N	G G	A A	T T	T C	38	8.16667	No	No	No	No
478	Male	Heroin dependence	A A	G A	G G	A A	T T	T T	26	7.75	Yes	Yes	No	Yes
480	Male	Heroin dependence	A A	N N	G T	A G	T C	T T	41	17.8333	No	Yes	No	No
482	Male	Heroin dependence	A A	N N	G T	A A	T C	T T	32	10	No	No	No	No
483	Male	Heroin dependence	A G	N N	G G	A G	T C	T C	33	13	No	Yes	No	No
484	Male	Heroin dependence	A A	N N	G G	A A	T T	T T	40	11.0833	No	Yes	No	No
485	Male	Heroin dependence	A A	N N	G T	A A	C C	T T	36	10	Yes	No	No	No
487	Male	Heroin dependence	N N	N N	G T	A G	T C	T C	36	6	Yes	No	No	No
489	Male	Heroin dependence	N N	N N	G G	A A	T C	T T	31	9.08333	Yes	No	No	No
495	Male	Heroin dependence	N N	G G	G G	A A	T C	T T	28	12.1667	No	No	Yes	Yes
496	Male	Heroin dependence	A A	N N	G G	A A	T C	T T	25	2	Yes	No	No	No
499	Male	Heroin dependence	A A	G G	G G	A A	T T	T C	29	2.08333	No	No	No	No
500	Male	Heroin dependence	A A	G G	G G	A A	T T	T T	36	2.16667	Yes	No	No	No
501	Male	Heroin dependence	N N	G G	G G	A A	T T	T C	39	7	No	Yes	No	No
502	Male	Heroin dependence	A A	G A	G G	A A	T T	T C	32	3.16667	No	No	No	No
503	Male	Heroin dependence	A A	G G	G T	A A	T T	T C	38	10	Yes	No	No	No
504	Male	Heroin dependence	A A	G A	G G	A G	T C	T T	21	5	No	Yes	No	Yes
505	Male	Heroin dependence	A A	G G	G G	A G	T C	T C	34	10	No	Yes	Yes	Yes
515	Male	Heroin dependence	N N	N N	G G	A A	T T	T T	32	7	No	No	No	No
516	Male	Heroin dependence	A A	G G	G T	A G	T C	T C	43	18.4167	No	No	No	No
517	Male	Heroin dependence	N N	G A	G G	A A	T C	T T	32	11	No	No	No	No
520	Male	Heroin dependence	N N	G G	G G	A A	T T	T C	32	12	Yes	No	No	No
521	Male	Heroin dependence	N N	G G	G T	A G	T C	T T	28	11.5	Yes	Yes	Yes	No
530	Male	Heroin dependence	A A	N N	G G	A G	T C	T T	38	14	Yes	No	No	No
535	Male	Heroin dependence	A A	N N	G T	A G	T C	T T	22	5	No	No	No	No
537	Male	Heroin dependence	A A	N N	G G	A A	T T	T T	24	2.83333	No	No	No	No
538	Male	Heroin dependence	A A	N N	G T	A G	T C	T C	29	8.5	Yes	No	No	No
544	Male	Heroin dependence	A A	G G	G G	A A	T T	T T	33	11.8333	Yes	No	No	No
545	Male	Heroin dependence	A A	N N	G G	A G	T C	C C	33	7.16667	No	Yes	No	No
546	Male	Heroin dependence	A A	A A	G T	A G	T C	T T	42	11.4167	No	No	No	No
548	Male	Heroin dependence	N N	N N	G G	A A	T C	T T	30	13	No	Yes	No	No
549	Male	Heroin dependence	A A	G G	G T	A A	T C	T C	40	18.3333	No	Yes	No	No
550	Male	Heroin dependence	A A	G G	G T	A A	T T	T C	24	4.16667	Yes	No	Yes	Yes
552	Male	Heroin dependence	N N	G G	G G	A A	T T	T C	34	14.1667	No	No	No	No
553	Male	Heroin dependence	N N	N N	G G	A A	T T	T T	40	7	No	No	No	No
555	Male	Heroin dependence	N N	N N	G G	A A	T T	T T	31	3.66667	No	No	No	No
B1	Female	Heroin dependence	N N	N N	G G	A G	T C	T T	33	12.5	Yes	No	Yes	No
B107	Female	Heroin dependence	A A	N N	G G	A A	T C	T T	22	4.16667	No	Yes	Yes	Yes
B108	Female	Heroin dependence	A A	N N	G G	A G	T C	T T	26	4	No	No	Yes	Yes
B11	Female	Heroin dependence	A A	N N	T T	G G	C C	C C	32	5.08333	No	No	No	No
B110	Female	Heroin dependence	A A	N N	T T	G G	C C	C C	32	10.0833	No	No	No	No
B113	Female	Heroin dependence	N N	N N	G G	A G	T C	T C	38	18.5833	No	No	No	No
B114	Female	Heroin dependence	A A	N N	G G	A G	T C	T T	35	16.75	Yes	Yes	No	No
B115	Female	Heroin dependence	A A	N N	G T	A G	T C	T C	33	11	Yes	Yes	No	No
B118	Female	Heroin dependence	A A	N N	G G	A A	T T	T T	26	8.75	No	No	No	No
B120	Female	Heroin dependence	A A	N N	T T	G G	C C	C C	33	14	Yes	No	No	No
B121	Female	Heroin dependence	A A	N N	G T	A G	T C	T C	41	17.5	No	No	No	No
B122	Female	Heroin dependence	N N	N N	G G	A A	T C	T T	25	10.3333	No	No	Yes	No
B123	Female	Heroin dependence	A A	N N	G G	G G	C C	T C	35	15.5	Yes	No	No	No
B130	Female	Heroin dependence	N N	N N	G G	A G	T C	T C	31	13.6667	No	Yes	No	No
B134	Female	Heroin dependence	N N	N N	G G	G G	C C	C C	32	15.5833	No	No	Yes	No
B135	Female	Heroin dependence	N N	N N	G G	A G	C C	C C	28	8.16667	No	No	No	No
B136	Female	Heroin dependence	A A	N N	G G	G G	T C	T T	33	11	No	No	No	No
B137	Female	Heroin dependence	N N	N N	G G	A A	T T	T T	34	1.41667	No	No	No	No
B140	Female	Heroin dependence	A A	N N	G G	A A	T T	T T	39	12	Yes	Yes	No	No
B141	Female	Heroin dependence	A A	N N	G T	A G	T C	T C	43	11.5	No	No	No	No
B142	Female	Heroin dependence	N N	N N	G G	A A	T T	T T	30	4.25	No	No	No	No
B143	Female	Heroin dependence	N N	N N	G G	A A	C C	T T	26	10	Yes	No	No	No
B144	Female	Heroin dependence	N N	N N	G G	A A	T T	T T	20	3	No	No	No	No
B145	Female	Heroin dependence	N N	N N	G G	A G	T C	T C	28	13.6667	No	Yes	No	No
B148	Female	Heroin dependence	N N	N N	G T	A G	T C	C C	39	16.6667	No	No	No	No
B15	Female	Heroin dependence	A A	N N	G G	A A	T T	T C	30	3.75	No	No	No	No
B151	Female	Heroin dependence	N N	N N	G G	A G	T C	T C	28	11.25	Yes	Yes	No	Yes
B154	Female	Heroin dependence	N N	N N	G T	A G	T C	T C	40	4.33333	No	No	No	No
B155	Female	Heroin dependence	A A	G G	G G	A A	T T	T T	44	17.5	No	No	No	No
B156	Female	Heroin dependence	A A	N N	G G	A G	C C	T T	40	6.5	No	Yes	No	No
B157	Female	Heroin dependence	N N	N N	G T	G G	C C	C C	22	6.66667	No	Yes	Yes	No
B159	Female	Heroin dependence	A A	N N	G G	A G	T C	T C	26	7.33333	No	No	No	No
B160	Female	Heroin dependence	A A	N N	G G	A A	T T	T T	33	6	No	No	No	No
B161	Female	Heroin dependence	N N	N N	G T	A G	T C	T C	40	7.91667	No	Yes	No	No
B162	Female	Heroin dependence	A A	N N	G G	A A	T T	T T	25	8.25	No	No	No	Yes
B163	Female	Heroin dependence	A A	N N	G G	A A	T T	C C	32	9.33333	No	No	No	No
B165	Female	Heroin dependence	A A	N N	T T	A G	T C	C C	34	11.1667	No	No	No	No
B167	Female	Heroin dependence	A A	G A	G G	A A	T T	T T	26	9	No	No	No	No
B171	Female	Heroin dependence	A A	G G	G G	A A	T T	T T	46	13.5	No	No	No	No
B172	Female	Heroin dependence	A A	N N	G T	A G	T C	T C	25	7.75	Yes	No	No	No
B174	Female	Heroin dependence	A A	N N	G T	A G	C C	T C	36	11	No	No	No	No
B176	Female	Heroin dependence	N N	N N	G G	A G	T C	T T	35	2.91667	No	Yes	No	No
B177	Female	Heroin dependence	A A	N N	G G	A A	T C	T T	42	18.25	No	No	No	No
B178	Female	Heroin dependence	A A	N N	G G	A A	T T	T C	40	15.25	No	Yes	Yes	No
B179	Female	Heroin dependence	N N	N N	G T	A G	C C	T C	30	2.16667	No	No	Yes	No
B180	Female	Heroin dependence	A A	N N	G G	A G	T C	T T	41	17.6667	No	No	No	No
B181	Female	Heroin dependence	N N	N N	G T	A G	T C	C C	30	14.4167	Yes	No	No	No
B182	Female	Heroin dependence	N N	N N	G T	A G	T C	T C	37	17.3333	No	No	No	No
B183	Female	Heroin dependence	A A	N N	G G	A A	T T	T T	36	12.1667	Yes	Yes	No	No
B184	Female	Heroin dependence	A G	N N	G G	G G	C C	T T	35	6.16667	No	No	No	No
B186	Female	Heroin dependence	A A	N N	G G	A G	T C	T T	26	10.6667	Yes	No	No	No
B187	Female	Heroin dependence	N N	N N	G G	A A	T T	T T	28	11.25	Yes	No	Yes	Yes
B188	Female	Heroin dependence	N N	N N	G G	A A	T T	T T	22	5.5	Yes	No	Yes	Yes
B189	Female	Heroin dependence	N N	N N	G G	A A	T T	T T	47	12.25	No	No	No	No
B190	Female	Heroin dependence	A A	N N	G G	A G	T C	T T	24	4.33333	No	Yes	No	No
B191	Female	Heroin dependence	A A	N N	G G	A A	T T	T T	24	8.41667	No	No	No	No
B194	Female	Heroin dependence	N N	N N	G G	A A	T T	T T	30	14.5833	Yes	No	No	No
B196	Female	Heroin dependence	N N	G G	G G	A A	T T	T T	44	15.5833	No	No	No	No
B197	Female	Heroin dependence	N N	N N	G G	A A	T T	T T	21	3.25	No	No	Yes	Yes
B198	Female	Heroin dependence	N N	N N	G G	A A	T C	T T	32	4.33333	No	No	No	No
B200	Female	Heroin dependence	N N	N N	G G	A A	T C	T T	32	8.58333	No	Yes	No	No
B201	Female	Heroin dependence	N N	G G	G G	A A	T C	T T	36	12.5833	No	No	No	No
B202	Female	Heroin dependence	N N	N N	G G	A A	T C	T T	28	2.58333	Yes	No	Yes	No
B203	Female	Heroin dependence	N N	N N	G G	A G	T T	T C	34	4	Yes	No	Yes	Yes
B205	Female	Heroin dependence	N N	N N	G G	A A	T T	T T	43	20.4167	No	No	No	No
B206	Female	Heroin dependence	N N	N N	G G	A A	T T	T T	29	5.75	No	No	No	No
B207	Female	Heroin dependence	A A	N N	G G	A A	T T	T C	45	20.5833	No	Yes	No	No
B210	Female	Heroin dependence	N N	N N	G G	A A	T T	T T	24	5.41667	No	Yes	Yes	No
B211	Female	Heroin dependence	N N	N N	G G	A G	C C	T T	43	19.5	Yes	No	No	No
B212	Female	Heroin dependence	A A	N N	G T	A G	T C	T C	27	4	No	No	No	No
B213	Female	Heroin dependence	A A	N N	G G	A A	T C	C C	46	19.25	Yes	No	No	No
B216	Female	Heroin dependence	N N	N N	G G	A A	T T	T T	28	9.33333	No	Yes	No	Yes
B217	Female	Heroin dependence	N N	N N	G T	A G	T C	T C	34	9.08333	Yes	No	Yes	Yes
B218	Female	Heroin dependence	N N	N N	G G	A G	T C	C C	36	13.5	No	No	No	No
B219	Female	Heroin dependence	N N	N N	G G	A A	T T	T T	29	5.75	No	No	No	No
B222	Female	Heroin dependence	A A	N N	G G	G G	C C	T T	38	7.41667	No	No	No	No
B223	Female	Heroin dependence	A A	N N	G T	A G	T C	T C	35	16.3333	No	No	No	No
B227	Female	Heroin dependence	N N	N N	G G	A A	T C	T T	34	11.5833	Yes	No	No	No
B231	Female	Heroin dependence	A A	N N	G G	A G	T C	T T	36	16.5	No	No	No	No
B232	Female	Heroin dependence	A A	N N	G G	A A	T T	T T	32	2.91667	No	No	No	Yes
B233	Female	Heroin dependence	A A	N N	G G	A A	T T	T T	46	15.5833	No	No	No	No
B234	Female	Heroin dependence	A A	N N	G T	A G	T C	T T	31	13.0833	No	No	No	No
B235	Female	Heroin dependence	A A	N N	G G	A A	T T	T T	28	12.5833	No	No	No	No
B236	Female	Heroin dependence	A A	N N	G G	A A	T T	T T	32	13	No	Yes	Yes	No
B240	Female	Heroin dependence	A A	N N	G G	A G	T C	T C	45	12.75	Yes	Yes	No	No
B241	Female	Heroin dependence	N N	N N	G T	G G	C C	T T	28	3	No	Yes	No	Yes
B242	Female	Heroin dependence	A A	N N	G G	A A	T T	T T	30	11.25	No	Yes	No	No
B243	Female	Heroin dependence	N N	N N	G T	A G	T C	T C	37	16	No	No	No	No
B244	Female	Heroin dependence	A A	N N	G G	A A	T T	C C	25	10.25	No	Yes	No	No
B245	Female	Heroin dependence	N N	N N	T T	G G	C C	C C	34	14.5	No	No	No	Yes
B246	Female	Heroin dependence	A A	N N	G G	A A	T T	T T	24	4.41667	No	No	No	No
B247	Female	Heroin dependence	A A	N N	G G	A A	T T	T T	21	6.5	No	No	Yes	No
B249	Female	Heroin dependence	A A	N N	G G	A A	T T	T T	24	6.25	Yes	Yes	No	No
B250	Female	Heroin dependence	A A	N N	G T	A G	T C	T T	38	10.25	No	No	No	No
B253	Female	Heroin dependence	N N	N N	G G	A A	T C	T T	19	3	No	No	No	No
B254	Female	Heroin dependence	A A	N N	G T	A G	T C	T C	27	11.1667	No	Yes	No	Yes
B255	Female	Heroin dependence	A A	N N	G T	A G	C C	T C	25	7.58333	No	No	Yes	Yes
B256	Female	Heroin dependence	A A	N N	G G	A G	T C	T T	36	18.0833	No	No	No	No
B258	Female	Heroin dependence	A A	N N	G G	A A	C C	T T	27	10.5833	No	No	No	No
B260	Female	Heroin dependence	A A	N N	G G	A A	T C	T T	35	16.25	Yes	Yes	No	No
B261	Female	Heroin dependence	N N	N N	G T	A G	T C	T C	24	9	No	No	No	No
B263	Female	Heroin dependence	A A	N N	G G	A A	T T	T T	47	10.8333	No	No	No	No
B264	Female	Heroin dependence	N N	N N	G G	A A	T T	T T	40	20.5	No	No	No	No
B265	Female	Heroin dependence	A A	N N	G G	A A	T T	T T	44	22.5	No	No	No	No
B266	Female	Heroin dependence	A A	N N	G G	A A	T C	T T	27	7.33333	No	No	Yes	No
B267	Female	Heroin dependence	A A	N N	G T	G G	C C	T T	29	11.5	No	No	No	No
B269	Female	Heroin dependence	A G	N N	G G	A G	T C	T C	21	0.5	No	No	Yes	No
B270	Female	Heroin dependence	N N	N N	G T	A G	T C	T T	45	13.5	No	No	No	No
B271	Female	Heroin dependence	N N	N N	G G	A A	T T	T T	21	4.41667	No	No	Yes	Yes
B272	Female	Heroin dependence	N N	N N	T T	G G	C C	T C	29	10.5833	Yes	No	No	No
B273	Female	Heroin dependence	A A	N N	G G	A A	T T	T T	37	10	No	No	No	No
B274	Female	Heroin dependence	A A	N N	G G	A A	T T	T T	40	1.41667	No	No	No	No
B275	Female	Heroin dependence	N N	N N	G G	A A	T T	T T	28	4.16667	No	No	Yes	Yes
B276	Female	Heroin dependence	A A	N N	G G	A A	T T	T C	39	13.9167	No	No	No	No
B279	Female	Heroin dependence	N N	N N	G T	A G	T C	T C	27	8.33333	No	No	No	No
B283	Female	Heroin dependence	A A	N N	G G	A A	T T	T T	30	9.16667	Yes	No	Yes	Yes
B284	Female	Heroin dependence	A A	N N	G G	A G	T C	T C	30	5.08333	No	No	No	No
B285	Female	Heroin dependence	N N	N N	G G	A A	T T	T T	28	10.5	Yes	Yes	No	No
B286	Female	Heroin dependence	A A	N N	G T	A G	T C	T C	46	11.4167	No	No	No	No
B288	Female	Heroin dependence	A A	N N	G G	A A	T T	T T	41	18.8333	No	No	No	No
B289	Female	Heroin dependence	N N	N N	G G	A A	T T	T T	35	15.1667	No	No	No	No
B29	Female	Heroin dependence	A A	N N	G G	A A	T T	T T	30	12	No	No	Yes	No
B290	Female	Heroin dependence	A A	N N	G G	A A	T T	T T	30	12	Yes	Yes	No	No
B292	Female	Heroin dependence	N N	N N	G G	A A	T C	T C	27	11.0833	Yes	Yes	Yes	Yes
B296	Female	Heroin dependence	A A	N N	G G	A A	T T	T T	28	11.6667	No	No	Yes	Yes
B297	Female	Heroin dependence	N N	N N	G G	A A	T T	T T	26	13	Yes	No	Yes	No
B299	Female	Heroin dependence	N N	N N	G G	A G	T C	T C	24	5.66667	No	No	No	No
B3	Female	Heroin dependence	A A	G G	T T	G G	C C	T C	41	14.25	No	No	No	No
B30	Female	Heroin dependence	A A	N N	G G	A A	C C	T T	35	15.75	Yes	Yes	No	No
B301	Female	Heroin dependence	N N	N N	G G	A A	T C	T C	36	13.3333	No	Yes	No	No
B31	Female	Heroin dependence	A A	N N	G G	A A	T T	T T	41	19.25	No	No	No	No
B32	Female	Heroin dependence	A A	N N	G T	A G	T C	C C	29	3.66667	No	Yes	No	No
B37	Female	Heroin dependence	N N	N N	G G	A G	T C	T C	26	10.4167	No	Yes	No	No
B38	Female	Heroin dependence	A A	N N	G G	G G	C C	T C	34	15	No	No	No	No
B4	Female	Heroin dependence	N N	G A	G T	A G	C C	T C	21	2	Yes	Yes	Yes	Yes
B41	Female	Heroin dependence	N N	N N	G G	A G	T C	T T	27	9.41667	No	No	No	No
B42	Female	Heroin dependence	A A	N N	G G	A A	T T	T T	28	11.25	No	Yes	No	No
B43	Female	Heroin dependence	A G	N N	G G	A G	T C	T C	29	9.91667	No	Yes	No	No
B44	Female	Heroin dependence	N N	N N	G G	A A	T T	T T	31	11.6667	Yes	Yes	No	No
B49	Female	Heroin dependence	A A	N N	G T	A G	T C	T C	28	12.5	No	No	Yes	No
B52	Female	Heroin dependence	A A	N N	G G	A A	T T	T T	36	8.41667	No	No	No	No
B53	Female	Heroin dependence	A A	N N	G G	A A	T C	T T	28	9.58333	No	No	No	No
B55	Female	Heroin dependence	A A	N N	G T	A G	T C	T C	36	19.5	No	Yes	No	No
B56	Female	Heroin dependence	N N	N N	G G	A A	T C	T T	35	4.75	No	No	No	No
B58	Female	Heroin dependence	N N	N N	G G	A G	T C	T T	28	4.5	No	No	No	No
B59	Female	Heroin dependence	A A	N N	G G	A A	T T	T T	27	11.9167	No	No	Yes	No
B60	Female	Heroin dependence	A A	N N	G T	A G	T C	T C	32	14.5	No	Yes	No	No
B61	Female	Heroin dependence	N N	N N	G G	A G	T C	T C	30	7.08333	No	No	No	No
B63	Female	Heroin dependence	A A	N N	G G	A A	T C	T T	21	7.5	No	No	No	No
B64	Female	Heroin dependence	N N	N N	G G	A G	T C	T T	44	13	No	Yes	No	No
B65	Female	Heroin dependence	A A	N N	G G	A A	T T	T T	45	10.5833	No	No	No	No
B66	Female	Heroin dependence	A A	N N	G T	A G	T C	T C	25	9	No	No	No	No
B68	Female	Heroin dependence	A A	N N	T T	G G	C C	T T	30	14.5833	Yes	No	Yes	No
B69	Female	Heroin dependence	A A	N N	G T	A G	T C	T C	22	3.58333	Yes	No	Yes	No
B7	Female	Heroin dependence	N N	N N	G T	A G	T C	T C	26	7	No	No	Yes	Yes
B70	Female	Heroin dependence	A A	N N	G G	A A	T T	T T	45	11.5833	Yes	Yes	No	No
B75	Female	Heroin dependence	N N	N N	G G	A A	T T	T T	35	11.1667	No	No	No	No
B76	Female	Heroin dependence	N N	N N	G G	A G	T C	T C	37	1.5	No	No	No	No
B79	Female	Heroin dependence	A A	N N	G G	A G	T C	T T	38	1.66667	No	No	Yes	No
B8	Female	Heroin dependence	N N	G G	G G	A A	T T	T T	28	5.83333	No	No	No	No
B82	Female	Heroin dependence	A A	N N	G G	A A	T C	T T	24	3.83333	Yes	No	Yes	Yes
B83	Female	Heroin dependence	A A	N N	G G	A A	T C	T T	24	4.08333	Yes	Yes	No	No
B84	Female	Heroin dependence	A A	N N	G G	A A	T T	T T	40	15.5833	No	Yes	No	No
B85	Female	Heroin dependence	A A	N N	G G	A A	T T	T T	34	4.75	No	Yes	No	No
B87	Female	Heroin dependence	A A	N N	T T	G G	C C	C C	43	18.6667	Yes	Yes	Yes	Yes
B88	Female	Heroin dependence	A A	N N	G G	A G	T C	T T	42	5	No	No	No	No
B9	Female	Heroin dependence	N N	G G	G T	A A	T T	C C	23	10.0833	No	No	Yes	No
B91	Female	Heroin dependence	A A	N N	G G	A A	T C	T T	26	5.58333	No	No	No	No
B93	Female	Heroin dependence	A A	N N	G G	A G	T C	T T	36	14.3333	No	No	No	Yes
B95	Female	Heroin dependence	A A	N N	G G	A G	T C	T C	20	2.91667	No	No	No	No
B98	Female	Heroin dependence	A A	N N	G G	A A	T T	T T	35	15.1667	No	No	No	No
B99	Female	Heroin dependence	N N	N N	G T	G G	C C	C C	54	16.1667	Yes	No	No	No
D1	Male	Heroin dependence	N N	N N	G G	A A	T T	T T	38	4.08333	Yes	No	No	No
D10	Male	Heroin dependence	N N	N N	G G	A A	T C	T T	33	9.33333	No	No	No	No
D100	Male	Heroin dependence	A G	G G	G G	A G	T C	T C	27	9	No	No	No	No
D104	Male	Heroin dependence	A A	N N	G T	A G	T C	T C	27	9	Yes	No	No	No
D105	Male	Heroin dependence	A A	N N	G G	A A	T T	T T	32	16	Yes	No	Yes	No
D106	Male	Heroin dependence	A A	G G	G G	A A	T T	T T	30	4	Yes	No	No	No
D108	Male	Heroin dependence	A A	N N	G G	A A	T T	T T	21	3.5	No	No	No	No
D109	Male	Heroin dependence	A A	N N	G G	A G	T C	T T	34	16.6667	Yes	Yes	Yes	Yes
D11	Male	Heroin dependence	N N	N N	G G	A G	T C	T C	31	14.75	Yes	No	No	No
D116	Male	Heroin dependence	A A	N N	G T	A G	T C	T C	34	3.41667	No	No	No	No
D118	Male	Heroin dependence	A A	G A	G G	A A	T T	T T	33	13.4167	No	No	No	No
D12	Male	Heroin dependence	N N	N N	G G	A G	T C	T C	40	11	No	No	No	No
D121	Male	Heroin dependence	A A	G G	G T	A G	C C	T C	35	14	Yes	No	No	No
D123	Male	Heroin dependence	A A	G G	G T	A G	T C	T C	29	8	No	No	No	No
D13	Male	Heroin dependence	N N	N N	G T	G G	C C	T C	31	9	No	No	No	No
D16	Male	Heroin dependence	N N	N N	G T	A G	T C	T C	33	15	Yes	No	No	No
D17	Male	Heroin dependence	N N	N N	G G	A A	T T	T T	35	3	Yes	No	No	No
D19	Male	Heroin dependence	N N	N N	G T	A G	T C	T C	31	16.75	Yes	No	No	No
D20	Male	Heroin dependence	N N	N N	G G	A A	T T	T T	38	6.25	Yes	No	No	No
D34	Male	Heroin dependence	N N	N N	G T	A G	T C	T C	40	7.75	No	Yes	No	No
D35	Male	Heroin dependence	N N	N N	G G	A A	T T	T T	38	12.25	Yes	No	No	No
D36	Male	Heroin dependence	N N	N N	G T	A G	T C	T C	38	3.33333	No	No	No	No
D37	Male	Heroin dependence	A A	G A	G G	A A	T C	T T	37	9.83333	No	No	No	No
D4	Male	Heroin dependence	N N	N N	G G	A A	T T	T T	30	11	No	No	No	No
D43	Male	Heroin dependence	A A	G G	G G	A A	T T	T T	38	1	No	No	No	No
D45	Male	Heroin dependence	A A	G G	G G	A A	T C	T T	32	13	No	No	No	No
D50	Male	Heroin dependence	A A	N N	G G	A A	T T	T T	27	8.58333	Yes	No	Yes	Yes
D53	Female	Heroin dependence	A A	N N	G G	A A	T T	T T	26	10	No	No	No	No
D58	Male	Heroin dependence	A A	N N	G G	A G	C C	T T	28	8.58333	No	No	No	Yes
D6	Female	Heroin dependence	N N	N N	G G	A G	T C	T T	40	1	No	No	No	No
D60	Male	Heroin dependence	A A	G G	G G	A A	T T	T T	35	19.8333	No	No	No	No
D65	Male	Heroin dependence	A A	G G	G G	A A	T T	T T	36	6.75	Yes	No	No	No
D68	Male	Heroin dependence	A A	G G	G G	A A	T T	T T	29	1.5	No	No	No	No
D72	Male	Heroin dependence	A A	N N	G G	A A	T C	T T	27	0.666667	No	No	No	No
D73	Male	Heroin dependence	A A	G G	G G	A A	T C	T T	40	12	No	No	No	No
D74	Male	Heroin dependence	A A	G G	G G	A A	T T	T T	25	5	No	No	No	No
D75	Male	Heroin dependence	A A	N N	G G	A A	T T	T T	56	19.5	No	No	No	No
D76	Female	Heroin dependence	N N	G A	G G	A A	T T	T T	30	4	Yes	No	No	No
D8	Female	Heroin dependence	N N	N N	G G	A A	T T	T T	32	9.25	No	No	No	No
D81	Male	Heroin dependence	A G	N N	G G	G G	C C	T C	28	8	No	No	Yes	Yes
D82	Male	Heroin dependence	N N	G A	G G	A A	T T	T T	46	10.4167	No	No	No	No
D83	Male	Heroin dependence	A A	N N	G T	A G	T C	T C	21	5.83333	No	No	Yes	No
D88	Male	Heroin dependence	A A	G G	G G	A A	T T	T T	31	4.33333	No	No	No	No
D9	Male	Heroin dependence	N N	N N	G G	A G	T C	T T	31	6	No	No	No	No
D96	Male	Heroin dependence	A A	G A	G G	A A	T T	T C	23	10	No	Yes	No	No
D98	Male	Heroin dependence	A A	N N	G G	A G	T C	T T	26	8	Yes	Yes	No	No
D99	Male	Heroin dependence	A A	G G	G T	A G	T C	T C	26	8	No	No	No	No
BJCN193	Female	Control	N N	N N	G G	A G	T C	C C	44
BJCN197	Male	Control	N N	N N	G G	A A	T T	T T	49
BJCN204	Female	Control	N N	N N	G G	A A	T T	T T	38
BJCN213	Male	Control	N N	N N	G G	A A	T T	T T	49
BJCN214	Male	Control	N N	N N	G T	G G	C C	T C	51
BJCN221	Male	Control	N N	N N	G G	A A	T C	T T	48
BJCN223	Male	Control	N N	N N	G T	A G	T C	T C	38
BJCN224	Male	Control	N N	N N	G G	A A	T T	T T	47
BJCN235	Female	Control	N N	N N	G G	A A	T T	T T	47
BJCN237	Female	Control	N N	N N	G G	A A	T T	T T	34
BJCN241	Female	Control	N N	N N	G G	A A	T T	T T	49
BJCN266	Female	Control	N N	N N	G T	A G	T C	T C	51
BJCN268	Male	Control	N N	N N	G T	A G	T C	T C	55
BJCN275	Female	Control	N N	N N	G G	A A	T T	T T	48
BJCN280	Male	Control	N N	N N	G G	A A	T C	T T	45
BJCN281	Male	Control	N N	N N	G G	A G	T C	T T	44
BJCN284	Male	Control	N N	N N	G G	A G	T C	T T	47
BJCN285	Female	Control	N N	N N	G G	A A	T T	T T	30
BJCN288	Male	Control	N N	N N	G G	A A	T C	T T	18
BJCN289	Female	Control	N N	N N	G G	A G	T C	T T	47
BJCN292	Male	Control	N N	N N	G G	A A	T T	T T	50
BJCN294	Female	Control	N N	N N	G G	A A	T C	T T	44
BJCN297	Male	Control	N N	N N	G G	A A	T C	T T	49
BJCN299	Female	Control	N N	N N	G G	A A	T C	T T	51
BJCN300	Female	Control	N N	N N	G T	A G	T C	T C	49
BJCN304	Male	Control	N N	N N	G G	A G	T C	T T	48
BJCN305	Female	Control	N N	N N	G G	A A	T T	T T	40
BJCN308	Male	Control	N N	N N	G G	A A	T C	T T	51
BJCN309	Female	Control	N N	N N	G G	A A	T T	T T	43
BJCN310	Male	Control	N N	N N	G G	A A	T T	T T	47
BJCN312	Male	Control	N N	N N	G G	A G	T C	T T	22
BJCN315	Male	Control	N N	N N	G G	A A	T C	T T	49
BJCN317	Female	Control	N N	N N	G G	A A	T T	T T	33
BJCN319	Female	Control	N N	N N	G G	A A	T T	T T	53
BJCN324	Male	Control	N N	N N	G G	A A	T C	T T	21
BJCN325	Male	Control	N N	N N	G G	A G	T C	T C	23
BJCN328	Male	Control	N N	N N	G G	A G	T C	T T	55
BJCN338	Female	Control	N N	N N	G T	A G	T C	T C	26
BJCN340	Female	Control	N N	N N	G G	G G	C C	C C	30
BJCN341	Female	Control	N N	N N	G G	A A	T T	T T	26
BJCN342	Male	Control	N N	N N	G G	A G	T C	T T	32
BJCN344	Male	Control	N N	N N	T T	G G	C C	C C	55
BJCN345	Female	Control	N N	N N	G G	A A	T T	T T	43
BJCN346	Male	Control	N N	N N	G G	A A	T T	T T	21
BJCN349	Female	Control	N N	N N	G G	A A	T T	T T	30
BJCN350	Female	Control	N N	N N	G G	A A	T T	T T	48
BJCN353	Female	Control	N N	N N	G G	A A	T T	T T	50
BJCN354	Female	Control	N N	N N	G G	G G	C C	T C	38
BJCN355	Female	Control	N N	N N	G G	A A	T T	T T	49
BJCN359	Male	Control	N N	N N	G G	A A	T T	T T	47
BJCN362	Female	Control	N N	N N	G T	G G	C C	C C	30
BJCN363	Male	Control	N N	N N	G G	G G	C C	T C	28
BJCN368	Female	Control	N N	N N	G G	A A	T T	T T	49
BJCN377	Male	Control	N N	N N	G T	A G	T C	T C	21
BJCN382	Female	Control	N N	N N	G G	A A	T T	T T	44
BJCN388	Male	Control	N N	N N	G G	A G	T C	T T	57
BJCN398	Female	Control	N N	N N	G G	A A	T T	T T	49
BJCN401	Female	Control	N N	N N	G G	A A	T T	T T	62
BJCN407	Female	Control	N N	N N	G G	A A	T T	T T	59
BJCN410	Female	Control	N N	N N	G T	A G	C C	T C	46
BJCN415	Female	Control	N N	N N	G G	A G	T C	T T	18
BJCN417	Female	Control	N N	N N	G T	A G	T C	T C	45
BJCN419	Male	Control	N N	N N	G G	A A	T C	T T	51
BJCN421	Female	Control	N N	N N	G G	A A	T T	T T	47
BJCN422	Male	Control	N N	N N	G G	A A	T C	T T	18
BJCN432	Male	Control	N N	N N	G G	A A	T T	T T	58
BJCN436	Female	Control	N N	N N	G G	A A	T T	T T	47
BJCN440	Male	Control	N N	N N	G G	A A	T C	T T	30
BJCN441	Male	Control	N N	N N	G T	A G	T C	T C	23
BJCN442	Female	Control	N N	N N	G G	A A	T C	T T	43
BJCN444	Female	Control	N N	N N	G G	A A	T T	T T	44
BJCN448	Female	Control	N N	N N	G G	A A	T T	T T	23
BJCN449	Female	Control	N N	N N	G T	A G	C C	T C	45
BJCN450	Male	Control	N N	N N	G G	A A	T T	T T	45
BJCN451	Female	Control	N N	N N	G T	G G	C C	T C	45
BJCN452	Male	Control	N N	N N	G G	A G	T C	T T	49
BJCN453	Female	Control	N N	N N	G T	A G	T C	T C	25
BJCN454	Male	Control	N N	N N	G T	A G	T C	T C	21
BJCN456	Female	Control	N N	N N	G G	A G	T C	T T	21
BJCN457	Female	Control	N N	N N	G T	A G	T C	T C	22
BJCN458	Male	Control	N N	N N	G T	A G	T C	T C	22
BJCN459	Female	Control	N N	N N	G G	A A	T C	T T	49
BJCN462	Male	Control	N N	N N	G T	A G	T C	T C	22
BJCN463	Female	Control	N N	N N	G T	A G	T C	T C	45
BJCN464	Female	Control	N N	N N	G G	A A	C C	T T	48
BJCN466	Female	Control	N N	N N	G G	A G	C C	T T	25
BJCN468	Male	Control	N N	N N	G G	A A	T T	T T	46
BJCN469	Male	Control	N N	N N	G G	A A	T C	T T	21
BJCN471	Male	Control	N N	N N	G T	A G	T C	T C	39
BJCN472	Male	Control	N N	N N	G G	A G	T C	T T	42
BJCN473	Female	Control	N N	N N	G G	A A	T C	T T	24
BJCN474	Female	Control	N N	N N	G G	A A	T T	T T	21
BJCN475	Male	Control	N N	N N	G G	A G	T C	T T	18
BJCN476	Female	Control	N N	N N	G G	A A	T T	T T	39
BJCN477	Male	Control	N N	N N	G G	A A	T T	T T	47
BJCN478	Female	Control	N N	N N	G G	A A	T T	T T	47
BJCN479	Male	Control	N N	N N	G G	A A	T T	T T	18
BJCN481	Female	Control	N N	N N	G G	A A	T T	T T	46
BJCN482	Male	Control	N N	N N	G G	A A	T C	T T	42
BJCN483	Female	Control	N N	N N	G G	A A	C C	T T	20
BJCN484	Male	Control	N N	N N	G G	A G	T C	T T	19
BJCN485	Male	Control	N N	N N	G G	A A	T C	T T	23
BJCN486	Female	Control	N N	N N	G G	A G	T C	T T	45
BJCN487	Female	Control	N N	N N	G G	A G	T C	T C	41
BJCN488	Female	Control	N N	N N	G T	A G	C C	T C	47
BJCN489	Female	Control	N N	N N	G T	A G	T C	T C	49
BJCN490	Female	Control	N N	N N	G G	A G	T C	T T	24
BJCN491	Male	Control	N N	N N	G G	A A	T T	T T	22
BJCN492	Male	Control	N N	N N	G G	A A	T T	T T	23
BJCN493	Male	Control	N N	N N	G T	A G	C C	T C	23
BJCN494	Female	Control	N N	N N	G G	A A	T C	T T	30
BJCN601	Female	Control	N N	N N	G G	A G	T C	T T	19
BJCN602	Female	Control	N N	N N	G G	A A	T C	T T	24
BJCN603	Female	Control	N N	N N	G G	A A	T C	T T	24
BJCN604	Female	Control	N N	N N	G G	A A	T C	T T	20
BJCN605	Female	Control	N N	N N	G G	A A	T C	T T	21
BJCN606	Female	Control	N N	N N	G G	A G	T C	T T	22
BJCN607	Female	Control	N N	N N	G G	A A	T T	T T	21
BJCN608	Male	Control	N N	N N	G G	A A	T T	T T	25
BJCN609	Male	Control	N N	N N	G T	G G	C C	T C	22
BJCN611	Female	Control	N N	N N	G G	A A	T T	T C	25
BJCN612	Male	Control	N N	N N	G G	A A	T T	T T	22
BJCN613	Male	Control	N N	N N	G G	A A	C C	T T	25
BJCN614	Male	Control	N N	N N	G T	A G	T C	T C	25
BJCN615	Female	Control	N N	N N	G G	A A	T T	T T	21
BJCN616	Male	Control	N N	N N	G G	A A	T C	T T	22
BJCN617	Male	Control	N N	N N	G G	A A	T T	T T	25
BJCN619	Female	Control	N N	N N	G G	A A	T C	T T	19
BJCN620	Male	Control	N N	N N	G G	A G	T C	T T	22
BJCN622	Female	Control	N N	N N	G G	A A	T T	T T	21
BJCN623	Female	Control	N N	N N	G G	A G	T C	T T	21
BJCN624	Male	Control	N N	N N	G G	A A	T T	T T	27
BJCN626	Male	Control	N N	N N	G G	A A	T T	T T	25
BJCN627	Female	Control	N N	N N	G G	A A	T T	T T	26
BJCN628	Female	Control	N N	N N	G T	G G	C C	C C	24
BJCN629	Female	Control	N N	N N	G G	A A	T T	T T	22
BJCN630	Female	Control	N N	N N	G G	A A	T T	T T	21
BJCN631	Female	Control	N N	N N	G G	A A	T T	T T	22
BJCN632	Female	Control	N N	N N	G T	A G	C C	T C	21
BJCN633	Female	Control	N N	N N	G T	A G	T C	T C	21
BJCN634	Female	Control	N N	N N	G G	A A	T T	T T	22
BJCN635	Female	Control	N N	N N	G G	A A	T T	T T	21
BJCN636	Male	Control	N N	N N	G T	A G	T C	T C	23
BJCN637	Female	Control	N N	N N	G G	A G	C C	T T	25
BJCN638	Female	Control	N N	N N	G G	A A	T T	T T	23
BJCN639	Female	Control	N N	N N	G G	A A	T T	T T	25
BJCN640	Male	Control	N N	N N	G G	A A	T C	T T	18
BJCN641	Female	Control	N N	N N	G G	A A	T T	T T	22
BJCN642	Female	Control	N N	N N	G T	G G	C C	T C	25
BJCN643	Male	Control	N N	N N	G G	A A	T C	T T	24
BJCN644	Male	Control	N N	N N	G G	A A	T C	T C	24
BJCN645	Male	Control	N N	N N	G G	A A	T T	T T	22
BJCN646	Male	Control	N N	N N	G G	A A	T C	T T	25
BJCN647	Male	Control	N N	N N	G T	A G	C C	T C	23
BJCN648	Female	Control	N N	N N	G G	A A	T T	T T	20
BJCN649	Female	Control	N N	N N	G G	A A	T T	T T	20
BJCN651	Female	Control	N N	N N	G G	A A	T T	T T	20
BJCN652	Female	Control	N N	N N	G T	A G	T C	C C	22
BJCN653	Male	Control	N N	N N	G T	A G	T C	T C	25
BJCN654	Male	Control	N N	N N	G G	A G	T C	T T	25
BJCN655	Female	Control	N N	N N	G G	A A	T T	T T	25
BJCN657	Female	Control	N N	N N	G G	A A	T T	T T	22
BJCN658	Female	Control	N N	N N	G G	A G	T C	T T	20
BJCN659	Male	Control	N N	N N	G G	A A	T T	T T	20
BJCN660	Male	Control	N N	N N	G T	G G	C C	T T	22
BJCN661	Male	Control	N N	N N	G G	A A	T T	T T	21
BJCN662	Male	Control	N N	N N	G G	A A	T C	T T	27
BJCN663	Female	Control	N N	N N	G G	A A	T T	T T	26
BJCN664	Female	Control	N N	N N	G G	A A	T T	T T	24
BJCN665	Male	Control	N N	N N	G G	A G	T C	T T	28
BJCN666	Female	Control	N N	N N	G T	A G	C C	T C	25
BJCN667	Male	Control	N N	N N	G G	A A	T C	T T	30
BJCN668	Male	Control	N N	N N	G G	A G	C C	T T	23
BJCN669	Female	Control	N N	N N	G G	A A	T C	T T	22
BJCN670	Male	Control	N N	N N	G T	A G	T C	T C	23
BJCN671	Male	Control	N N	N N	G G	A A	T T	T T	24
BJCN672	Male	Control	N N	N N	G G	A G	T C	T T	24
BJCN674	Male	Control	N N	N N	G T	G G	C C	T C	24
BJCN675	Male	Control	N N	N N	G G	A A	T T	T T	21
BJCN676	Male	Control	N N	N N	G T	A G	T C	T C	26
BJCN677	Female	Control	N N	N N	G T	G G	C C	C C	25
BJCN678	Female	Control	N N	N N	G G	A A	T T	T T	25
BJCN679	Female	Control	N N	N N	G G	A A	T C	T T	24
BJCN680	Female	Control	N N	N N	G G	G G	C C	T T	25
BJCN681	Female	Control	N N	N N	G T	A G	T C	T C	23
BJCN682	Male	Control	N N	N N	G G	A G	T C	T C	23
BJCN683	Male	Control	N N	N N	G T	A G	C C	T C	24
BJCN684	Female	Control	N N	N N	G G	A A	T T	T T	23
BJCN685	Female	Control	N N	N N	G G	A A	T C	T T	24
BJCN686	Female	Control	N N	N N	G G	A A	T T	T T	22
BJCN687	Female	Control	N N	N N	G G	A A	T T	T T	20
BJCN689	Male	Control	N N	N N	G T	A G	T C	T C	21
BJCN690	Male	Control	N N	N N	G T	A G	T C	T C	28
BJCN691	Female	Control	N N	N N	G G	A A	T T	T T	24
BJCN692	Female	Control	N N	N N	G T	A G	T C	T C	23
BJCN694	Female	Control	N N	N N	G G	A A	T T	T T	23
BJCN695	Male	Control	N N	N N	G T	A G	T C	T C	28
BJCN696	Male	Control	N N	N N	G G	A G	T C	T C	22
BJCN697	Male	Control	N N	N N	G G	A A	T T	T T	25
BJCN698	Male	Control	N N	N N	G G	A A	T T	T T	23
BJCN699	Male	Control	N N	N N	G G	A G	C C	T T	22
BJCN700	Male	Control	N N	N N	T T	G G	C C	C C	22
BJCN701	Male	Control	N N	N N	G G	A A	T T	T T	22
BJCN702	Female	Control	N N	N N	G T	A G	C C	T C	25
BJCN703	Female	Control	N N	N N	G G	A G	T C	T T	22
BJCN704	Female	Control	N N	N N	G G	A A	T T	T T	22
BJCN705	Female	Control	N N	N N	G G	A A	T T	T T	23
BJCN706	Male	Control	N N	N N	G T	A G	C C	T C	24
BJCN707	Male	Control	N N	N N	G G	G G	C C	T T	23
BJCN709	Female	Control	N N	N N	G G	A A	C C	T T	23
BJCN710	Female	Control	N N	N N	G T	A G	T C	T C	20
BJCN711	Male	Control	N N	N N	G G	A G	T C	T T	19
BJCN712	Male	Control	N N	N N	G T	A G	T C	T C	22
BJCN713	Male	Control	N N	N N	G G	A A	T T	T T	20
BJCN714	Female	Control	N N	N N	G G	A A	T C	T T	21
BJCN715	Female	Control	N N	N N	G G	A A	T T	T T	24
BJCN716	Male	Control	N N	N N	G G	A G	C C	T T	23
BJCN717	Male	Control	N N	N N	G G	A A	T T	T T	23
BJCN718	Female	Control	N N	N N	G G	A G	T C	T C	23
BJCN719	Male	Control	N N	N N	G G	A G	T C	T T	24
BJCN720	Female	Control	N N	N N	G G	A A	T C	T T	22
BJCN721	Male	Control	N N	N N	G T	A G	C C	T C	23
BJCN722	Male	Control	N N	N N	G G	A A	T C	T T	25
BJCN723	Male	Control	N N	N N	G T	A G	T C	T C	20
BJCN724	Male	Control	N N	N N	G T	G G	C C	T C	22
BJCN725	Female	Control	N N	N N	G T	A G	T C	T C	18
BJCN726	Male	Control	N N	N N	G T	A G	T C	T C	21
BJCN727	Male	Control	N N	N N	G T	A G	T C	T C	25
BJCN728	Male	Control	N N	N N	G T	A G	T C	T C	20
BJCN729	Female	Control	N N	N N	G T	G G	C C	T C	21
BJCN730	Male	Control	N N	N N	G G	A A	T C	T T	26
BJCN731	Male	Control	N N	N N	G T	A G	T C	T C	24
BJCN732	Female	Control	N N	N N	G G	A A	T C	T T	23
BJCN733	Female	Control	N N	N N	G T	A G	T C	T C	23
BJCN734	Male	Control	N N	N N	G G	A A	T C	T T	28
BJCN735	Female	Control	N N	N N	G T	A G	T C	T C	24
BJCN736	Male	Control	N N	N N	G G	A G	T C	T T	26
BJCN737	Female	Control	N N	N N	G G	A A	T T	T T	28
BJCN738	Male	Control	N N	N N	G T	A G	T C	T C	21
BJCN739	Female	Control	N N	N N	G G	A A	C C	T T	23
BJCN740	Female	Control	N N	N N	G G	A G	T C	T T	20
BJCN742	Male	Control	N N	N N	G G	A A	T C	T T	22
BJCN743	Female	Control	N N	N N	G G	G G	C C	C C	23
BJCN744	Female	Control	N N	N N	G T	A G	T C	T C	19
BJCN745	Female	Control	N N	N N	G G	A G	T C	T T	18
BJCN746	Male	Control	N N	N N	T T	G G	C C	C C	20
BJCN747	Male	Control	N N	N N	G G	A A	T T	T T	26
BJCN748	Female	Control	N N	N N	G G	A A	T T	T T	22
BJCN749	Female	Control	N N	N N	G T	A G	C C	T C	20
BJCN750	Female	Control	N N	N N	G G	A A	T T	T T	20
BJCN751	Female	Control	N N	N N	G G	A A	T T	T T	19
BJCN752	Female	Control	N N	N N	G G	A A	T T	T T	21
BJCN753	Female	Control	N N	N N	G T	A G	T C	T C	19
BJCN754	Female	Control	N N	N N	G G	A G	T C	T T	18
BJCN755	Female	Control	N N	N N	G G	A A	T T	T T	19
BJCN757	Male	Control	N N	N N	G G	A A	T T	T T	19
BJCN758	Male	Control	N N	N N	T T	G G	C C	C C	28
BJCN760	Male	Control	N N	N N	G G	A A	T C	T T	24
BJCN761	Male	Control	N N	N N	G T	A G	T C	T C	22
BJCN762	Male	Control	N N	N N	G T	A G	C C	T C	22
BJCN763	Male	Control	N N	N N	G T	A G	T C	T C	20
BJCN764	Male	Control	N N	N N	T T	G G	C C	C C	22
BJCN766	Male	Control	N N	N N	G G	A A	T C	T T	21
BJCN767	Female	Control	N N	N N	G G	A A	T T	T T	24
BJCN768	Male	Control	N N	N N	G T	A G	T C	T C	21
BJCN769	Female	Control	N N	N N	G G	A A	T T	T T	21
BJCN770	Female	Control	N N	N N	G G	A G	T C	T C	23
BJCN771	Female	Control	N N	N N	G G	A A	T T	T T	21
BJCN772	Female	Control	N N	N N	G T	A G	T C	T C	21
BJCN773	Female	Control	N N	N N	G G	A A	T T	T T	24
BJCN774	Female	Control	N N	N N	G G	A A	T T	T T	24
BJCN775	Male	Control	N N	N N	G T	A G	T C	T C	24
BJCN776	Female	Control	N N	N N	G G	A A	T T	T T	21
BJCN777	Male	Control	N N	N N	G T	A G	T C	T C	19
BJCN778	Male	Control	N N	N N	G G	A G	T C	T T	26
BJCN779	Female	Control	N N	N N	G T	A G	T C	T C	22
BJCN780	Male	Control	N N	N N	G G	A A	T C	T T	22
BJCN781	Male	Control	N N	N N	G G	A A	T C	T T	25
BJCN782	Female	Control	N N	N N	G T	A G	T C	T C	25
BJCN783	Female	Control	N N	N N	G G	A A	T C	T T	24
BJCN784	Female	Control	N N	N N	G G	A A	T T	T T	22
BJCN785	Female	Control	N N	N N	G G	A G	T C	T C	22
BJCN786	Female	Control	N N	N N	G G	A G	T C	T C	24
BJCN787	Female	Control	N N	N N	G G	A A	T T	T T	20
BJCN788	Female	Control	N N	N N	G T	G G	C C	C C	23
BJCN789	Male	Control	N N	N N	G G	A A	C C	T T	22
BJCN790	Female	Control	N N	N N	G G	A A	T T	T T	19
BJCN791	Female	Control	N N	N N	G G	A A	T C	T T	19
BJCN792	Female	Control	N N	N N	G G	A A	T T	T T	19
BJCN794	Male	Control	N N	N N	G T	A G	T C	T C	22
BJCN795	Male	Control	N N	N N	G G	A A	T T	T T	23
BJCN796	Female	Control	N N	N N	G G	A A	T T	T T	19
BJCN797	Male	Control	N N	N N	G T	A G	T C	T C	20
BJCN798	Male	Control	N N	N N	G G	A A	T T	T T	22
BJCN799	Male	Control	N N	N N	G G	A A	T C	T T	22
BJCN800	Female	Control	N N	N N	G T	A G	T C	T C	22
BJCN801	Male	Control	N N	N N	G T	A G	T C	T C	22
BJCN802	Male	Control	N N	N N	G T	G G	C C	T C	24
BJCN803	Male	Control	N N	N N	G T	A G	T C	T C	24
BJCN805	Female	Control	N N	N N	G G	A A	T T	T T	19
BJCN806	Female	Control	N N	N N	G T	A G	T C	T C	23
BJCN807	Male	Control	N N	N N	G G	A A	T C	T T	23
BJCN808	Male	Control	N N	N N	G T	G G	C C	T C	23
BJCN809	Female	Control	N N	N N	G T	A G	T C	T T	20
BJCN810	Female	Control	N N	N N	G T	A G	T C	T T	26
BJCN811	Female	Control	N N	N N	G T	A G	T C	T T	26
BJCN812	Male	Control	N N	N N	G G	A A	T T	T T	24
BJCN813	Male	Control	N N	N N	G G	A A	T C	T C	27
BJCN816	Female	Control	N N	N N	G G	A A	T C	T C	21
BJCN817	Female	Control	N N	N N	G G	A A	T T	T T	20
BJCN820	Female	Control	N N	N N	G G	A G	C C	T T	20
BJCN821	Male	Control	N N	N N	G T	A G	C C	T C	18
BJCN822	Female	Control	N N	N N	G T	A G	T C	T C	19
BJCN823	Female	Control	N N	N N	G G	A A	T T	T T	19
BJCN824	Male	Control	N N	N N	G T	A G	T C	T C	26
BJCN825	Female	Control	N N	N N	G G	A G	C C	T C	19
BJCN827	Female	Control	N N	N N	G T	A G	T C	T C	19
KA10	Male	Control	A A	N N	G G	A A	T T	T T	46
KA101	Male	Control	N N	G G	G T	A G	T C	T C	28
KA102	Male	Control	N N	G G	G T	A G	T C	T C	27
KA103	Male	Control	N N	N N	G G	A A	T T	T T	35
KA104	Male	Control	N N	N N	G G	A A	T T	T T	30
KA106	Male	Control	N N	G G	G T	A G	T C	T C	25
KA107	Male	Control	N N	G G	G G	A G	T C	T T	38
KA109	Male	Control	N N	N N	G G	A A	T T	T T	32
KA11	Male	Control	A A	G G	G T	A G	T C	T C	37
KA110	Male	Control	N N	N N	G G	A A	T T	T T	43
KA111	Male	Control	N N	G G	G G	A A	C C	T T	43
KA112	Male	Control	A A	N N	G G	A G	C C	T T	26
KA113a	Male	Control	N N	N N	G G	A G	T C	T T	32
KA113b	Male	Control	N N	G G	G G	A A	T T	T T	40
KA114	Male	Control	N N	N N	G T	A G	T C	T C	30
KA115	Male	Control	N N	G G	G G	A G	C C	T T	38
KA116	Male	Control	N N	G A	G G	A A	T T	T T	41
KA118	Male	Control	N N	G G	G G	A A	T T	T T	46
KA12	Male	Control	A A	N N	G G	A A	T T	T T	27
KA121	Male	Control	A A	N N	G T	G G	C C	T C	23
KA122	Male	Control	A A	N N	G T	A G	T C	T C	48
KA123	Male	Control	A A	G A	G G	A A	T C	T T	42
KA124	Male	Control	A A	G A	G T	A G	T C	T C	20
KA126	Male	Control	A A	N N	G G	A G	T C	T C	28
KA127	Male	Control	A A	G A	G G	A A	T T	T T	45
KA128	Male	Control	A A	N N	G G	A A	T T	T T	36
KA129	Male	Control	A A	G G	G G	A A	T C	T T	40
KA13	Male	Control	A A	N N	G T	A A	T T	T T	28
KA130	Male	Control	N N	G A	G T	A G	T C	T C	36
KA131	Male	Control	N N	G G	G T	A G	T C	T C	42
KA132	Male	Control	A A	G G	G G	A A	T T	T T	35
KA133	Male	Control	A A	N N	G T	A G	T C	T C	29
KA134	Male	Control	A A	G G	G G	A A	T T	T T	29
KA135	Male	Control	A A	A A	G G	A A	T T	T T	40
KA137	Male	Control	A A	N N	G G	A A	T T	T T	22
KA138	Male	Control	A A	G G	G G	A A	T T	T T	22
KA139	Male	Control	A A	G G	G G	A G	T C	T T	26
KA141	Male	Control	N N	N N	G G	A A	T C	T T	37
KA142	Male	Control	A A	N N	G T	A G	T C	T C	30
KA143	Male	Control	A A	G G	G G	A A	C C	T T	27
KA145	Male	Control	A A	N N	G G	A A	T C	T T	34
KA146	Male	Control	A A	N N	G T	A G	T C	T C	26
KA147	Male	Control	A A	G G	G T	A G	T C	T C	29
KA148	Male	Control	A A	N N	G G	A G	C C	T C	31
KA149	Male	Control	A A	N N	G T	A G	T C	T C	25
KA15	Male	Control	A A	N N	G T	A G	T C	T C	36
KA150	Male	Control	A A	G G	G G	A A	T C	T T	36
KA151	Male	Control	A A	G A	G T	A G	T C	T C	32
KA152	Male	Control	A A	G A	G G	A A	T T	T T	38
KA153	Male	Control	A A	G G	G G	A G	T C	T T	37
KA154a	Male	Control	A A	N N	G T	A G	T C	T C	38
KA154b	Male	Control	A A	N N	G T	A G	T C	T C	31
KA156	Male	Control	A A	N N	G G	A A	T T	T T	34
KA16	Male	Control	A A	G G	G T	A G	T C	T C	29
KA160	Male	Control	A A	G G	G T	A G	T C	T C	25
KA161	Male	Control	A A	A A	G G	A A	T T	T T	33
KA162	Male	Control	A A	G A	G G	A A	T T	T T	34
KA163	Male	Control	A A	G A	G G	A A	T T	T T	32
KA165	Male	Control	A A	A A	G G	A A	T T	T T	20
KA166	Male	Control	A A	G G	G T	A G	C C	T C	27
KA167	Male	Control	A A	G A	G T	A G	T C	T C	29
KA168	Male	Control	A G	G G	G G	G G	C C	C C	26
KA169	Male	Control	A A	G G	G G	A A	T T	T T	32
KA173	Male	Control	A A	N N	G G	A A	T C	T T	34
KA174	Male	Control	A A	N N	G G	A A	T T	T T	48
KA176	Male	Control	A A	G G	G G	A A	T T	T T	40
KA178	Male	Control	A A	G G	G T	A G	T C	T C	34
KA179	Male	Control	A A	G A	G G	A A	T C	T T	38
KA180	Male	Control	A A	G G	G G	A A	T T	T T	37
KA181	Male	Control	A A	G G	G G	A G	T C	T T	44
KA182	Male	Control	A A	G G	G G	A A	T T	T T	23
KA185a	Male	Control	A A	G G	G G	A A	T T	T T	34
KA185b	Male	Control	A G	G A	G T	A G	T C	T C	31
KA187	Male	Control	A A	G G	G G	A A	T T	T T	36
KA189	Male	Control	N N	N N	T T	A G	C C	C C	43
KA19	Male	Control	A A	G A	G G	A A	T C	T T	38
KA190	Male	Control	A A	N N	G G	A A	C C	T T	41
KA191	Male	Control	A A	G G	G G	A G	T C	T T	37
KA193a	Male	Control	A A	G G	G T	G G	C C	T C	38
KA193b	Male	Control	A A	N N	G G	A G	T C	T T	28
KA195	Male	Control	A G	G G	G G	A G	T C	T C	38
KA196	Male	Control	A A	G G	G G	A A	T C	T T	38
KA197	Male	Control	A A	G G	G G	A A	T T	T T	41
KA199	Male	Control	A G	G G	G G	A G	T C	T C	30
KA200	Male	Control	A A	G G	G T	G G	C C	T C	26
KA201	Male	Control	A A	G G	G T	A G	T C	T C	27
KA22	Male	Control	A A	G G	G G	G G	T C	T T	46
KA23	Male	Control	A A	N N	G G	G G	T C	T C	37
KA24	Male	Control	A A	G G	G G	A G	T C	T T	34
KA25	Male	Control	A A	N N	T T	G G	C C	C C	40
KA26	Male	Control	A A	G A	G G	A A	T T	T T	30
KA27	Male	Control	N N	N N	G G	A A	T T	T T	37
KA28	Male	Control	A A	N N	G G	A G	C C	T T	36
KA29	Male	Control	A A	N N	G G	A A	T C	T T	32
KA34	Male	Control	A A	G G	G G	A A	C C	T T	32
KA35	Male	Control	A A	G A	G G	A A	T T	T T	32
KA36	Male	Control	N N	G G	G T	A G	C C	T C	35
KA37	Male	Control	A A	N N	G G	A A	T C	T T	28
KA38	Male	Control	A A	N N	G T	A G	C C	T C	45
KA4	Male	Control	A A	G G	G G	A A	T T	T T	45
KA42	Male	Control	N N	N N	G G	A A	T T	T T	25
KA43	Male	Control	A A	N N	G G	A A	T T	T T	34
KA45	Male	Control	A A	N N	G T	G G	C C	T C	32
KA47	Male	Control	A A	N N	G G	A A	T T	T T	31
KA49	Male	Control	A A	G A	G G	A A	T T	T T	33
KA5	Male	Control	N N	G G	G G	A A	T C	T T	38
KA51	Male	Control	A A	G G	G G	A A	T T	T T	40
KA52	Male	Control	A A	G G	G T	A A	T C	T T	31
KA53	Male	Control	A G	G G	G G	G G	C C	T C	30
KA54	Male	Control	A A	G G	G G	A A	T T	T T	31
KA55	Male	Control	A A	N N	G T	A G	T C	T C	33
KA58	Male	Control	A A	N N	G G	A G	T C	T T	31
KA59	Male	Control	A A	N N	G G	A A	T T	T T	38
KA6	Male	Control	N N	N N	G G	A A	T C	T T	27
KA60	Male	Control	A A	N N	G G	A A	T T	T T	28
KA61	Male	Control	A A	G A	G G	A A	T T	T T	28
KA63	Male	Control	A A	N N	G G	A A	T T	T T	34
KA64	Male	Control	N N	N N	G G	A A	T T	T T	26
KA65	Male	Control	A A	G G	G T	A G	T C	T C	21
KA66	Male	Control	A A	N N	G T	G G	C C	T C	45
KA67	Male	Control	A A	N N	G G	A A	T T	T T	30
KA68	Male	Control	A A	N N	G G	A A	T T	T T	36
KA69	Male	Control	A G	N N	G G	A G	T C	T C	33
KA7	Male	Control	A A	N N	T T	G G	C C	C C	24
KA70	Male	Control	A A	N N	G G	A A	T T	T T	27
KA71	Male	Control	A A	G A	G G	A A	T T	T T	33
KA72	Male	Control	A A	N N	G T	A G	T C	T C	38
KA74	Male	Control	A A	N N	G G	A A	T T	T T	38
KA75	Male	Control	A A	N N	G G	A A	C C	T C	38
KA78	Male	Control	N N	N N	G G	A A	C C	T T	44
KA80	Male	Control	A A	G G	G G	A A	T C	T T	26
KA81	Male	Control	A A	G G	G G	A A	T C	T T	33
KA82	Male	Control	A A	G G	G G	A A	T T	T T	30
KA83	Male	Control	A A	N N	G G	A G	T C	T C	38
KA85	Male	Control	A A	N N	G G	A A	T C	T T	32
KA86	Male	Control	N N	N N	G G	A A	T T	T T	28
KA87	Male	Control	N N	N N	G G	A A	T C	T T	44
KA88	Male	Control	N N	G G	G G	A G	T C	T C	35
KA89	Male	Control	N N	G G	G G	A G	C C	T C	27
KA9	Male	Control	N N	N N	G G	A G	T C	T T	27
KA90	Male	Control	N N	N N	G G	A A	T C	T T	27
KA91	Male	Control	N N	N N	G G	A A	T C	T T	21
KA93	Male	Control	N N	N N	G G	A G	T C	T C	26
KA94	Male	Control	N N	N N	G G	A A	T T	T T	31
KA95	Male	Control	N N	N N	G G	A A	T C	T T	27
KA97	Male	Control	N N	N N	G G	A A	T T	T T	35
KA98	Male	Control	N N	N N	G T	A G	T C	T C	27
KB1	Female	Control	A A	G G	G G	A A	T C	T T	44
KB10	Female	Control	A A	G G	G G	A G	T C	C C	30
KB11a	Female	Control	A A	G G	G T	A G	T C	T C	32
KB12	Female	Control	A A	G G	G G	A A	T C	T T	26
KB13	Female	Control	A A	G G	G G	A A	T T	T T	32
KB14	Female	Control	A A	G G	G G	A A	T T	T T	41
KB15	Female	Control	A A	G A	G G	A A	T T	T T	34
KB16	Female	Control	A A	G G	G G	A G	C C	T C	34
KB18	Female	Control	A A	G G	G T	A G	T C	T C	38
KB19	Female	Control	A A	N N	G G	A A	T T	T T	41
KB2	Female	Control	A A	G G	G G	A A	T C	T T	35
KB20	Female	Control	A A	N N	G T	A G	T C	T C	32
KB21	Female	Control	A A	G G	G G	A G	C C	T T	31
KB22	Female	Control	A A	N N	G G	A A	T T	T T	43
KB23	Female	Control	A A	G G	G G	A G	T C	T T	32
KB24	Female	Control	A A	G A	G T	A G	T C	T C	40
KB25	Female	Control	A A	N N	G G	A A	T C	T T	46
KB26	Female	Control	A A	G A	G G	A A	T T	T T	37
KB27	Female	Control	A A	G G	G G	A A	T T	T T	32
KB29	Female	Control	A A	G A	G G	A A	T C	T T	40
KB3	Female	Control	A A	N N	G G	A A	T C	T T	30
KB30	Female	Control	A A	G G	G T	A G	T C	T C	26
KB31	Female	Control	A A	N N	G G	A A	T T	T T	36
KB4	Female	Control	A A	N N	G T	A G	T C	T C	31
KB6	Female	Control	A A	G G	G G	A A	T C	T T	36
KB7	Female	Control	A A	G A	G G	A A	T T	T T	38
KB9	Female	Control	A A	G G	G T	A G	T C	T T	31
KN1	Female	Control	A A	G G	T T	G G	C C	C C	23
KN11	Female	Control	A A	G A	G G	A A	T T	T T	46
KN12	Female	Control	A A	G A	G G	A A	T C	T T	27
KN2	Female	Control	A A	N N	G G	A A	T T	T T	30
KN4	Female	Control	A A	G A	G T	A G	T C	T T	35
KN5	Female	Control	A A	N N	G G	A G	T C	T C	38
KN6	Female	Control	A A	N N	G G	A A	T C	T T	32

## Sheet: Patient info
SubID	Disease status	Name	Age	Sex	Origin	Years	Alcohol	Sedative	Euphoriant	Hallucinogen
1	2	lizhong	26	1	汉族	3	1	1	1	1
2	2	liutenghui	36	1	汉族	15.8333	2	1	1	1
4	2	liuyang	22	1	汉族	4.5	2	1	1	2
5	2	yangchungui	37	1	汉族	8.75	2	1	1	1
6	2	yuchangcan	26	1	汉族	5.83333	1	1	2	1
7	2	kangmin	27	1	汉族	10	1	1	1	1
9	2	zenghuaqiao	27	1	少数民族	3.08333	2	2	1	1
10	2	yangchulong	32	1	汉族	14.9167	1	1	2	2
11	2	liwenhui	24	1	汉族	8.5	1	2	2	2
12	2	zhumeilin	34	1	汉族	11	2	1	1	1
13	2	susisong	28	1	汉族	9	1	2	1	1
14	2	wushishan	38	1	汉族	8.33333	1	2	1	1
15	2	yinxinchun	28	1	汉族	10	1	1	1	1
16	2	raolimin	27	1	汉族	8	1	1	1	1
17	2	yuanhua	37	1	汉族	14.6667	2	2	1	1
18	2	zhangxiangxing	39	1	汉族	11	1	1	1	1
19	2	lizefu	45	1	汉族	4.16667	1	1	1	1
20	2	duanyingchu	33	1	汉族	12.3333	1	1	1	1
21	2	liuxiaobo	32	1	汉族	15.6667	1	1	1	1
22	2	zouxihui	35	1	汉族	4.33	1	2	1	1
23	2	xuzhigang	31	1	汉族	13.4167	2	2	1	1
24	2	limosheng	27	1	汉族	8.33333	1	2	1	1
25	2	huangjianming	35	1	汉族	15.3333	2	1	1	1
26	2	lixiaoming	36	1	汉族	10.0833	2	2	1	1
27	2	lixiaoping	21	1	汉族	4	1	1	2	2
28	2	zouxuhui	28	1	汉族	6	1	1	1	1
29	2	zhangtianhong	40	1	汉族	1.58333	2	1	2	2
30	2	zhangshikui	36	1	汉族	11.75	1	1	1	1
31	2	liugang	35	1	汉族	11	1	1	1	1
32	2	yuanshuzhong	23	1	汉族	6	2	2	1	1
34	2	wuyuejin	38	1	汉族	12.1667	2	2	1	1
35	2	xiehailiang	33	1	汉族	8.83333	1	2	1	1
36	2	zengtao	32	1	汉族	11.6667	2	2	1	1
37	2	liqinen	40	1	汉族	9.58333	1	2	1	1
38	2	zhaoxiangyong	32	1	汉族	12.25	1	2	1	1
39	2	chenyibing	40	1	汉族	8	1	1	1	1
40	2	zhangyong	27	1	汉族	10.6667	1	1	1	1
41	2	liudengpan	32	1	汉族	7.25	1	1	1	1
42	2	luoxinwang	35	1	汉族	11	2	1	1	1
43	2	wangxianghong	37	1	汉族	13	2	1	1	1
44	2	pengyang	32	1	汉族	12.6667	1	1	1	1
45	2	yanzhenhai	34	1	汉族	10	1	1	1	1
46	2	xiehanfeng	25	1	汉族	10	1	1	1	1
47	2	litingbao	47	1	汉族	9.83333	1	1	1	1
48	2	linhaiping	38	1	汉族	11.8333	1	1	1	1
49	2	liurigao	28	1	汉族	10.5	1	2	1	1
50	2	pengkai	38	1	汉族	1.83333	1	2	2	1
51	2	fuxilin	33	1	汉族	8.83333	1	2	1	1
52	2	duanzhixiang	27	1	汉族	8.08333	2	2	2	2
53	2	libo	26	1	汉族	8.41667	1	2	1	1
54	2	liqiang	24	1	汉族	7.83333	2	2	1	1
55	2	caohongwei	42	1	汉族	18	2	1	2	2
56	2	yangyouxi	40	1	汉族	7.91667	1	2	1	1
57	2	zhangningqi	35	1	汉族	14	1	1	1	1
58	2	zhuyajun	37	1	汉族	16.3333	1	2	2	2
59	2	jiangyuxiong	33	1	汉族	11	1	2	1	1
60	2	liujianping	28	1	汉族	4.16667	1	1	1	1
61	2	luojianxiang	33	1	汉族	13.9167	1	1	1	1
62	2	lishen	24	1	汉族	4.75	1	2	1	1
63	2	zhangyingxi	49	1	汉族	6.91667	1	1	1	1
64	2	chenming	35	1	汉族	15	1	2	1	1
65	2	zengxingxing	30	1	汉族	10.3333	2	1	1	1
66	2	liuyanping	44	1	汉族	4.41667	1	1	1	1
67	2	lijianguo	33	1	汉族	12	2	1	2	2
68	2	wangkuan	33	1	汉族	15.0833	1	1	1	1
69	2	zengxiaoping	26	1	汉族	9.66667	2	2	1	1
70	2	yangzhixiong	46	1	汉族	18.8333	1	1	1	1
71	2	yitiejian	35	1	汉族	17.0833	2	2	2	1
72	2	jiangxiongqun	28	1	汉族	6	1	1	1	1
73	2	yuwenhong	34	1	汉族	12	1	2	1	1
74	2	yangzhengyong	28	1	汉族	10.4167	1	1	1	1
75	2	liujianwen	40	1	汉族	18	1	2	1	1
76	2	lihongjun	30	1	汉族	10.1667	1	1	1	1
77	2	liuzhiqiang	42	1	汉族	12	2	2	1	1
78	2	lanlin	32	1	汉族	10.8333	1	2	1	1
79	2	wangxin	33	1	汉族	10	1	1	1	1
80	2	liumanping	27	1	少数民族	1.83333	1	1	1	1
81	2	xujiansong	40	1	汉族	12	1	2	1	1
82	2	mahao	35	1	汉族	15.75	1	2	1	2
83	2	zouhua	32	1	汉族	8.83333	1	1	1	1
84	2	fuyueyun	45	1	汉族	17.25	1	1	1	1
86	2	zhangjian	24	1	汉族	6	1	2	1	1
87	2	zhangzhixiang	32	1	汉族	17.3333	1	1	1	1
88	2	liuxinhui	33	1	汉族	15.6667	1	1	1	1
89	2	zhouxiangxian	30	1	汉族	12.0833	1	2	1	1
90	2	wangzhiyong	30	1	汉族	11.6667	1	1	1	1
91	2	caoyongzhi	27	1	汉族	8.66667	1	1	1	2
92	2	liuyongping	33	1	汉族	9.66667	1	1	1	1
93	2	lifeng	29	1	汉族	10.9167	1	1	1	1
94	2	luoshuiqing	27	1	汉族	5	1	1	1	1
95	2	shunshiwen	40	1	汉族	16.25	1	2	1	1
96	2	lujie	30	1	汉族	11.6667	2	1	1	1
97	2	lixu	25	1	汉族	5	1	2	1	1
98	2	yijianxin	40	1	汉族	6.25	1	2	1	1
100	2	xiedongliang	32	1	汉族	12	1	2	1	1
102	2	huliang	38	1	少数民族	12	1	1	1	1
103	2	hejibing	30	1	少数民族	12	1	1	1	1
104	2	gongping	40	1	汉族	12	1	1	1	1
105	2	zenghaiqin	25	1	汉族	9	1	1	1	1
107	2	niweijun	32	1	汉族	16	2	2	1	1
108	2	liuwei	36	1	汉族	5.5	2	2	1	1
109	2	wuzhengjun	46	1	汉族	17.5833	1	1	1	1
111	2	liming	38	1	汉族	11	1	1	1	1
112	2	qingbinhui	25	1	汉族	6	1	1	1	1
114	2	lijing	50	1	汉族	17.75	1	1	1	1
115	2	luorizhong	33	1	汉族	10.8333	1	1	1	1
116	2	zengxianlong	31	1	汉族	15.4167	2	2	2	2
117	2	fengzhiyuan	27	1	汉族	10	1	2	1	1
118	2	huzehui	39	1	汉族	9	1	1	2	2
119	2	zengxinqi	34	1	汉族	15	2	1	1	1
120	2	xieguolin	47	1	汉族	21	1	1	1	1
121	2	lixinxi	34	1	汉族	15	1	1	1	1
122	2	liuzhongpeng	28	1	汉族	6.91667	1	1	1	1
123	2	liumiao	41	1	汉族	16	1	2	1	1
124	2	liubo	37	1	汉族	4	1	1	1	1
125	2	zhongming	34	1	汉族	12.1667	1	2	1	1
126	2	duanjianjun	31	1	汉族	12.4167	1	1	1	1
127	2	suchunyan	26	1	汉族	9	1	2	1	1
128	2	liuyuankui	37	1	汉族	10.4167	1	1	1	1
129	2	lichanggui	31	1	汉族	8	1	1	1	1
130	2	guoyan	25	1	汉族	8.91667	1	1	2	1
131	2	lantao	24	1	汉族	4.5	1	1	1	1
132	2	zhouaizhong	36	1	汉族	0.916667	1	2	1	1
133	2	xieronghua	51	1	汉族	4	1	1	1	1
134	2	chenliwen	43	1	汉族	12.6667	1	1	1	1
135	2	tansunguo	44	1	汉族	9.83333	1	2	1	1
136	2	youxianyou	30	1	汉族	4.16667	1	1	1	1
137	2	liangchengwu	38	1	汉族	12.1667	1	2	1	1
138	2	wangwu	25	1	汉族	10.1667	2	2	2	2
139	2	yangjian	23	1	汉族	5.25	1	2	1	1
140	2	jiangzebo	37	1	汉族	11.8333	1	2	1	1
141	2	wangyong	31	1	汉族	9.41667	2	1	1	1
142	2	heyanhui	23	1	汉族	4.5	1	1	1	1
143	2	zengzhi	28	1	汉族	12.25	2	2	2	1
144	2	zhangyangbin	27	1	汉族	7.91667	1	1	1	1
145	2	huangmin	41	1	汉族	12.0833	1	1	1	2
146	2	zengwenbin	40	1	汉族	13	2	2	1	1
147	2	renyong	31	1	汉族	9.5	1	1	1	1
148	2	huwenjun	40	1	汉族	16	1	1	1	1
149	2	zhoulianji	26	1	汉族	4.41667	2	1	1	1
150	2	zengdexing	25	1	汉族	6	2	1	1	1
151	2	yangxing	48	1	汉族	12	1	1	2	2
152	2	wuhao	41	1	汉族	19.4167	1	1	2	2
153	2	leidongyuan	38	1	汉族	10.25	2	1	1	1
154	2	zengxuezhi	31	1	汉族	7	1	1	1	1
155	2	yiweiqi	34	1	汉族	15.8333	1	2	1	1
156	2	renzhiqiang	31	1	汉族	8.83333	1	1	1	1
157	2	lijia	36	1	汉族	17	1	2	1	1
159	2	duanzhijian	38	1	汉族	14	1	2	1	1
161	2	liuyubing	28	1	汉族	9.75	1	1	1	1
162	2	zhuyongqi	41	1	汉族	13.75	2	2	1	1
163	2	huanglv	37	1	汉族	19	2	2	1	1
164	2	liuwenyi	30	1	汉族	10.8333	1	1	1	1
165	2	xiaoxinhua	42	1	汉族	19.25	1	1	1	1
166	2	jiangzhizhong	28	1	汉族	8.33333	1	2	1	1
167	2	yiaoyingliang	34	1	汉族	8.83333	2	2	2	1
168	2	duanxiong	39	1	汉族	12	2	1	1	1
169	2	yuguorong	41	1	汉族	11.25	1	1	1	1
170	2	fangzhizhi	27	1	汉族	6.16667	1	1	1	1
171	2	wangjun	24	1	汉族	10.25	2	1	1	1
172	2	fangliping	45	1	汉族	14	2	1	1	1
173	2	zoujiansheng	34	1	汉族	5.91667	2	1	1	1
174	2	xuxiangyan	22	1	汉族	4.16667	1	1	1	1
175	2	liuguangyou	32	1	汉族	13	1	2	1	1
176	2	fuyongjun	21	1	汉族	2.66667	1	1	1	1
177	2	xuweihua	31	1	汉族	5.66667	2	2	2	1
178	2	duanxiongwu	37	1	汉族	11.0833	2	2	1	1
179	2	panwenwu	28	1	汉族	11	1	2	1	1
180	2	duanleguang	34	1	汉族	8.75	1	2	1	1
181	2	fuzhengxing	42	1	汉族	13.5833	1	2	1	1
182	2	qinjiming	27	1	少数民族	9.66667	2	1	1	1
183	2	lijianxin	38	1	汉族	15.6667	2	1	1	1
184	2	yanqiang	26	1	汉族	8.25	1	2	2	2
185	2	chengji	27	1	汉族	7.75	1	1	1	1
186	2	liudingding	24	1	汉族	4.83333	1	1	1	1
187	2	wuwuqing	21	1	汉族	3.08333	2	2	1	1
188	2	caijianzhong	31	1	汉族	11.1667	1	2	1	1
189	2	yuwen	39	1	汉族	7	1	2	1	1
190	2	liucongmei	40	1	汉族	14.25	1	1	1	1
191	2	wangkai	20	1	少数民族	4.83333	1	1	1	1
192	2	lixuyang	38	1	汉族	11.5	1	1	1	1
193	2	liangbaohua	34	1	汉族	14.0833	1	2	1	1
194	2	langjiajun	33	1	汉族	12.6667	2	2	1	1
195	2	luzhihui	33	1	汉族	14	1	2	1	1
196	2	suxinmin	34	1	汉族	5.16667	2	2	1	1
197	2	xieyanjun	46	1	汉族	9.83333	1	1	1	1
198	2	wuguoping	32	1	汉族	11.8333	1	2	1	1
199	2	huangxidi	38	1	汉族	5.25	1	1	1	1
200	2	yangchun	28	1	汉族	5	1	1	1	2
201	2	zhangbin	31	1	汉族	13	1	1	1	1
202	2	chenhefa	25	1	汉族	8	2	1	1	1
203	2	duanjunhua	29	1	汉族	8	1	1	1	1
204	2	chenhui	34	1	汉族	8.33333	1	1	1	1
205	2	litiebin	34	1	汉族	11.6667	1	2	1	1
206	2	yuanlunping	30	1	汉族	3.58333	1	2	1	1
207	2	xiaohuizhi	21	1	汉族	6.33333	1	2	1	1
208	2	dingfang	38	1	汉族	9.66667	2	2	1	1
209	2	yanliuhong	31	1	汉族	12.75	2	2	1	1
210	2	liujianbing	32	1	汉族	10.25	2	2	1	1
211	2	hehuangliang	42	1	汉族	18.1667	1	1	2	2
212	2	huanyixiang	26	1	汉族	6.25	1	1	1	1
213	2	wulinfeng	32	1	汉族	11	1	2	1	1
214	2	guosihui	30	1	汉族	12	1	2	1	1
215	2	pihongxian	39	1	汉族	13.4167	1	1	1	1
216	2	luosenquan	43	1	汉族	14.6667	2	2	1	1
217	2	xiaoxing	31	1	汉族	4.41667	1	2	1	1
218	2	zenghui	38	1	汉族	11.3333	1	1	1	1
219	2	chenyong	42	1	汉族	13	1	1	1	1
220	2	zhouxiwen	33	1	汉族	11	1	2	1	1
221	2	yangjianjun	45	1	汉族	17.3333	2	1	1	1
222	2	liuzhi	30	1	汉族	13.8333	1	1	1	1
223	2	wusonglun	40	1	汉族	18	2	1	1	1
224	2	like	32	1	汉族	14.4167	2	1	1	1
225	2	zhouwuben	38	1	汉族	2.41667	2	1	1	1
226	2	wanghao	32	1	汉族	10.1667	1	2	1	1
227	2	tanhaiping	21	1	汉族	3.83333	1	1	2	2
228	2	guobobo	25	1	汉族	6.66667	2	1	1	1
229	2	ouhuimin	29	1	汉族	7.83333	1	2	1	1
230	2	zhengqihui	33	1	少数民族	1.5	1	1	1	1
232	2	yuyong	30	1	汉族	5.66667	2	2	1	1
233	2	weiaiming	33	1	汉族	9.83333	2	1	1	1
234	2	wupinghui	31	1	汉族	13	1	2	1	1
235	2	yangbin	40	1	汉族	17.6667	1	1	2	1
236	2	zhaoyaping	50	1	汉族	16	1	1	1	1
237	2	fanyuebin	36	1	汉族	12.6667	1	1	2	2
238	2	wujianhua	45	1	汉族	14.3333	1	2	1	1
239	2	zhuyong	36	1	汉族	8.91667	1	2	1	1
240	2	luoyongjun	29	1	汉族	12.4167	1	2	1	1
241	2	ouhuiguang	33	1	汉族	13.0833	2	2	2	1
242	2	hejiming	31	1	汉族	5	2	2	1	1
243	2	huangxi	21	1	汉族	6.08333	1	2	1	1
244	2	wumingfeng	25	1	汉族	6	2	1	1	1
245	2	zhaozhengjun	38	1	汉族	16.75	1	1	1	1
246	2	wangshijin	40	1	汉族	12.0833	1	1	1	1
247	2	hujianyun	38	1	汉族	11.9167	1	1	1	1
248	2	pengzhongqiu	49	1	汉族	12.9167	1	2	1	1
249	2	shenggezhong	34	1	汉族	11	2	1	1	1
250	2	tangguohua	40	1	汉族	16	2	1	1	1
251	2	zhangyong	24	1	汉族	5.08333	1	2	1	1
252	2	lilianfeng	31	1	汉族	12.0833	1	1	1	1
253	2	xiaojianbo	32	1	汉族	4	1	1	1	1
254	2	mabenchi	25	1	汉族	8	1	1	1	1
255	2	pengguang	34	1	汉族	7.83333	2	1	1	1
256	2	luoxiaofeng	29	1	汉族	7.25	1	1	1	1
258	2	lilinhua	35	1	汉族	2.33333	1	1	1	1
259	2	longjianhua	43	1	汉族	16.25	1	1	1	1
260	2	zhangzhengjun	36	1	汉族	9.66667	1	1	1	1
261	2	wangshaobo	33	1	汉族	16	1	1	1	1
262	2	huangcheng	36	1	汉族	16	1	2	1	1
263	2	zhouweibin	40	1	汉族	19	1	1	1	1
264	2	chencanming	28	1	汉族	10	2	2	1	1
265	2	lihongguang	44	1	汉族	6.33333	2	2	1	1
266	2	yishan	29	1	汉族	8.75	1	1	1	1
267	2	wangqifan	25	1	汉族	9.08333	1	1	1	1
268	2	yangjianhui	36	1	汉族	10	2	1	1	1
269	2	huangqiong	35	1	汉族	11	2	1	1	1
270	2	liuwenyi	37	1	汉族	2.16667	1	1	1	1
271	2	ouyangchaohu	36	1	汉族	9.16667	2	1	1	1
272	2	zhoubin	28	1	汉族	8.33333	1	2	1	1
273	2	suxuefeng	25	1	汉族	9.25	1	2	2	1
274	2	chenxianzan	44	1	汉族	6.25	1	1	1	1
275	2	tanjian	22	1	汉族	0.333333	2	1	2	2
276	2	liuzhaowen	39	1	汉族	13.0833	1	1	1	1
277	2	yangsongming	31	1	汉族	2.58333	1	1	1	1
278	2	liusen	36	1	汉族	15.25	1	2	2	1
279	2	yangxinhui	34	1	汉族	13.9167	1	2	2	2
280	2	liulianxi	36	1	汉族	12.25	1	1	1	1
281	2	chenlinlin	23	1	汉族	2.16667	1	2	1	1
282	2	liusilin	37	1	汉族	12	1	1	1	1
283	2	liangjingyue	21	1	汉族	0.416667	2	1	1	1
284	2	lihongliu	38	1	汉族	9.58333	1	2	2	2
285	2	liuxinchao	38	1	汉族	8	1	1	1	1
286	2	liaoshijian	26	1	汉族	11	1	1	1	1
287	2	zhoubishan	39	1	汉族	7.75	1	1	1	1
288	2	zengyonghui	32	1	汉族	8.83333	1	1	1	1
289	2	fubanglong	43	1	汉族	8.83333	1	1	1	1
290	2	zhongyongfeng	30	1	汉族	10.5	2	1	1	1
291	2	yuancong	23	1	汉族	3.83333	1	1	1	2
292	2	hufeng	29	1	汉族	4.83333	1	1	1	1
293	2	dingyuejun	26	1	汉族	9.91667	1	1	2	2
294	2	xulichun	32	1	汉族	3.16667	1	1	1	1
295	2	longwangsheng	34	1	汉族	5	1	1	1	1
296	2	zhouchunlai	43	1	汉族	19.75	2	1	2	2
297	2	yangjibing	25	1	汉族	8.16667	1	1	1	1
299	2	kangjixiong	30	1	汉族	11	2	1	2	1
301	2	zoujidong	34	1	汉族	10	2	1	1	1
302	2	liuzheng	26	1	汉族	10	1	1	1	1
303	2	zhongrenfeng	30	1	汉族	10.0833	1	1	1	1
304	2	hesan	20	1	汉族	4.75	1	1	1	1
305	2	tangzhi	41	1	汉族	15	1	1	1	1
306	2	wanglei	25	1	汉族	4.91667	1	1	1	1
307	2	chenwenqing	23	1	汉族	3	1	1	1	1
308	2	zhoujian	35	1	汉族	17.25	1	1	1	2
309	2	tangdongnan	59	1	汉族	18.0833	1	1	1	1
310	2	zhulu	28	1	汉族	13	1	1	1	2
311	2	liuqingfeng	34	1	汉族	2.58333	1	1	1	1
312	2	huangbaoke	32	1	汉族	13	1	1	1	1
313	2	lixingyuan	43	1	汉族	2.41667	1	1	2	2
314	2	wuxingxiao	36	1	汉族	12	2	2	1	1
315	2	hewenming	46	1	汉族	18.3333	1	1	1	1
316	2	hudatong	37	1	少数民族	13	1	1	1	1
317	2	liangfeng	27	1	汉族	8.16667	1	1	1	1
318	2	liminghua	44	1	汉族	19	2	1	1	1
319	2	wanli	23	1	少数民族	4.08333	2	2	1	1
320	2	yangjun	30	1	汉族	10.25	1	2	1	1
321	2	qindajun	35	1	少数民族	11.25	1	1	1	1
322	2	liuchanhui	38	1	汉族	13.3333	1	2	1	1
323	2	heweigang	32	1	汉族	12	1	1	1	1
324	2	linyang	24	1	汉族	8.41667	1	2	1	1
325	2	zhangshaowan	29	1	少数民族	10.1667	1	2	1	1
326	2	sunzhong	40	1	汉族	17.9167	2	2	1	1
327	2	daixiaoli	46	1	汉族	19.75	1	1	1	1
328	2	liuqingsong	27	1	汉族	8.58333	2	2	1	1
329	2	liwei	29	1	汉族	7.08333	1	1	1	1
330	2	taoxianliang	35	1	汉族	11	1	1	1	1
331	2	pengbenwen	28	1	汉族	4	1	1	1	1
332	2	lengjianwen	21	1	汉族	5	1	2	2	2
333	2	zhouyuhua	28	1	汉族	10	2	2	1	1
334	2	yunjianping	42	1	汉族	17.5	1	2	1	1
335	2	huyanping	27	1	汉族	4.5	1	2	1	1
336	2	liuxiangzhi	32	1	汉族	16	2	1	1	1
337	2	zhuli	36	1	汉族	16.0833	2	2	2	2
338	2	oujinming	47	1	汉族	13.25	2	2	1	1
339	2	zhangbo	27	1	汉族	9.75	2	1	1	1
340	2	renjianxin	36	1	汉族	15.75	2	1	1	1
341	2	wangbenwei	36	1	汉族	5.08333	1	1	1	1
342	2	yuanshirui	43	1	汉族	10.0833	1	2	1	1
343	2	liluofu	54	1	汉族	16	2	1	1	1
344	2	tangguoxiong	46	1	汉族	19	1	1	1	1
345	2	lixianniu	34	1	汉族	16	1	1	2	1
346	2	denghongjun	32	1	汉族	11.0833	1	2	1	1
347	2	quguangwen	36	1	汉族	13.9167	1	2	1	1
348	2	liubin	44	1	汉族	18.5833	1	1	1	1
349	2	suzhansheng	38	1	汉族	3.91667	2	1	1	1
350	2	yangzhongming	32	1	汉族	4.83333	1	1	1	1
351	2	lijifei	29	1	汉族	9.75	1	2	1	1
352	2	zhangyouguo	30	1	汉族	3.16667	2	1	1	1
353	2	fuguiqing	25	1	汉族	7.91667	1	2	1	1
354	2	zengxianlu	43	1	汉族	9.91667	1	1	1	1
355	2	yuanqing	40	1	汉族	11.0833	1	1	1	1
356	2	hejiacheng	26	1	汉族	10.8333	1	1	1	1
357	2	xieqiang	20	1	汉族	4	1	2	2	2
358	2	gufanghong	24	1	汉族	5	1	2	1	2
359	2	lusujing	47	1	汉族	1.91667	2	1	2	2
360	2	liangweiwen	38	1	汉族	18.6667	1	1	1	1
361	2	yangbin	31	1	汉族	11.0833	1	2	1	1
362	2	pengyouwu	30	1	汉族	11.0833	1	2	1	2
363	2	liuxianfeng	29	1	汉族	7.83333	1	1	1	1
364	2	caominghua	36	1	汉族	7	1	1	1	1
365	2	xiaomeixing	28	1	汉族	10	2	1	1	1
366	2	fanminghua	33	1	汉族	15	2	1	2	2
367	2	liuyong	25	1	汉族	8	1	1	2	2
368	2	zhouhua2	27	1	汉族	8.83333	1	1	1	1
369	2	yuzhuanzhuan	29	1	汉族	9	1	1	1	1
370	2	hezhaohui	30	1	汉族	11.8333	1	2	1	1
371	2	hujiangang	33	1	汉族	12	2	1	1	1
372	2	kangshijie	28	1	汉族	3.33333	1	1	1	1
373	2	caoliguo	33	1	汉族	10.75	2	2	1	2
374	2	lizhenliang	29	1	汉族	8	2	1	1	2
375	2	zhouxuejun	29	1	汉族	1.5	2	1	1	1
377	2	chentaibin	33	1	汉族	11	1	2	2	1
378	2	chenjiechun	30	1	汉族	4.25	1	2	1	1
379	2	chenxiaogang	38	1	汉族	10	1	1	1	1
380	2	chenzhaoqin	36	1	汉族	12.25	2	1	2	1
381	2	quxiaoxiang	46	1	少数民族	11.0833	1	2	1	1
382	2	liuliwei	47	1	汉族	18	2	1	1	1
383	2	dengpingan	33	1	汉族	6.33333	2	1	1	1
384	2	liaohan	27	1	汉族	6	2	1	2	2
385	2	liuaihua	40	1	汉族	1.83333	1	1	1	1
386	2	yangzhiwei	24	1	汉族	6.58333	1	1	1	1
387	2	lichengzhi	33	1	汉族	8.08333	2	2	1	1
388	2	liaoshen	26	1	汉族	10	1	2	1	1
390	2	lishishan	29	1	汉族	8.66667	1	2	1	1
391	2	maopingyuan	36	1	汉族	7.41667	1	2	1	1
392	2	liaodapeng	40	1	汉族	14	1	2	1	1
393	2	dengjiayou	38	1	汉族	13	2	1	1	1
394	2	yinkeliang	32	1	汉族	15.0833	1	2	1	1
395	2	liuxinfu	23	1	汉族	4.5	1	1	1	1
396	2	yanggmin	32	1	汉族	13.9167	1	2	1	1
397	2	kuangzhijian	30	1	汉族	8.33333	1	1	1	1
398	2	hezhihua	28	1	汉族	11.4167	2	2	1	1
399	2	zhouzhaoliang	49	1	汉族	17.5	2	1	1	1
400	2	wangzhonglin	36	1	汉族	14.5833	1	2	1	1
402	2	liyong	37	1	汉族	14.75	2	2	1	1
403	2	zhujiaomin	32	1	汉族	14	1	1	2	2
404	2	zoumuhua	26	1	汉族	10.3333	1	2	2	2
405	2	tanxujun	47	1	汉族	11.5833	1	1	1	1
406	2	shenggewen	43	1	汉族	12	1	2	1	1
407	2	guoxiangfeng	32	1	汉族	11.0833	1	2	2	1
408	2	huangjichang	35	1	汉族	5.08333	1	2	2	1
409	2	jiangminzhong	22	1	汉族	5.16667	1	2	1	1
411	2	zhouliangliang	23	1	汉族	7	1	1	2	1
412	2	daiguoping	44	1	汉族	8.33333	2	1	1	1
413	2	不详,未收集临床资料
414	2	luoxiaohong	34	1	汉族	11	1	2	1	1
415	2	qingzhihui	30	1	汉族	14.25	2	2	2	1
416	2	ranyongbing	37	1	汉族	2.08333	1	1	1	1
417	2	zhuming	26	1	汉族	7.66667	1	1	2	2
418	2	不详,临床资料未收集
419	2	heyuehui	25	1	汉族	1	1	1	1	1
420	2	yuhaibo	34	1	汉族	11	1	1	1	1
421	2	zhangshangjun	48	1	汉族	11	1	1	1	1
422	2	yugaowen	42	1	汉族	4	1	1	1	1
423	2	zengxinmin	20	1	汉族	5	1	1	1	1
424	2	tanchuping	28	1	汉族	5.75	1	1	1	1
425	2	chenzhixue	45	1	汉族	14.5833	2	1	1	1
426	2	daichenglin	42	1	汉族	16	1	1	1	1
427	2	meiqifang	35	1	汉族	12	2	1	2	2
428	2	xiaolei	22	1	汉族	2	1	1	1	1
429	2	guofeng	35	1	汉族	8	1	1	2	2
430	2	liucheng	45	1	汉族	17	1	1	1	1
431	2	pengdasheng	36	1	汉族	18.1667	2	2	2	2
432	2	lujingrong	30	1	汉族	3.83333	1	1	1	1
433	2	daiyingsheng	31	1	汉族	11	1	2	1	1
434	2	sunyongcai	30	1	汉族	9	1	2	1	1
435	2	liuzhijun	34	1	汉族	14	2	2	1	1
436	2	gaozhengming	35	1	汉族	12.0833	1	1	1	1
437	2	niejianbo	39	1	汉族	11.8333	1	2	1	1
438	2	liuxiang	30	1	汉族	12.5	2	1	1	1
439	2	zengzhixiong	34	1	汉族	12	2	1	1	1
440	2	yugang	29	1	汉族	9.16667	1	1	1	1
441	2	pengbin	33	1	汉族	16.5833	1	1	2	2
442	2	zhouwei	40	1	汉族	10.4167	2	1	2	2
443	2	dengdongji	26	1	汉族	0.916667	2	1	1	1
444	2	xieyuguang	44	1	汉族	15	2	1	1	1
445	2	zhoujia	31	1	汉族	15.5	2	2	2	2
446	2	lengehua	26	1	汉族	6	1	1	1	1
447	2	zhouhai	27	1	汉族	10.0833	1	1	1	1
448	2	maoweizhi	45	1	汉族	14	1	1	1	1
449	2	xiaozhengxiong	28	1	汉族	4	1	1	1	1
450	2	zhengjianjun	34	1	汉族	5	1	2	1	1
451	2	wangqiang	43	1	汉族	13	1	1	1	1
452	2	liangjingjing	28	1	汉族	4.66667	2	1	1	1
453	2	liuxiaolin	46	1	汉族	14	1	1	1	1
454	2	wukuanghua	37	1	汉族	13.5	1	1	1	1
455	2	houweidong	40	1	汉族	18	1	1	1	1
457	2	liujianhui	27	1	汉族	12.1667	2	1	2	1
458	2	qinshenghang	34	1	汉族	12.6667	1	1	1	1
459	2	chenzefeng	29	1	汉族	8.83333	1	1	2	1
460	2	lanfang	31	1	汉族	5.66667	1	1	1	1
461	2	tanmingxie	25	1	汉族	8.66667	1	2	1	1
462	2	liuzhiwei	36	1	汉族	13.6667	1	1	1	1
463	2	zhangxiaohui	38	1	汉族	14.6667	2	1	1	1
464	2	xiexin	37	1	汉族	16.75	1	1	2	2
465	2	pengxiaohua	34	1	汉族	9	1	1	1	1
466	2	lishengwen	34	1	汉族	9.16667	2	2	1	1
467	2	zhangwei	38	1	汉族	18.6667	1	1	1	1
468	2	huangjingbo	37	1	汉族	15.5	1	2	2	1
470	2	yifeng	37	1	汉族	11.6667	1	1	1	1
471	2	xuyahui	41	1	汉族	20	1	1	1	1
472	2	luoyachuan	37	1	汉族	18.5	2	1	2	2
473	2	yangjinwen	42	1	汉族	6.58333	1	1	1	1
474	2	pengjun	38	1	汉族	19	2	1	1	1
475	2	leiming	38	1	汉族	18.0833	2	2	1	1
476	2	luohonghui	38	1	汉族	8.16667	1	1	1	1
477	2	yanzhihua	32	1	汉族	13	1	1	1	1
478	2	chensuping	26	1	汉族	7.75	2	2	1	2
479	2	luozhiwu	34	1	汉族	8.83333	1	2	1	1
480	2	luoxingjun	41	1	汉族	17.8333	1	2	1	1
481	2	luohaihui	38	1	汉族	11	1	1	1	1
482	2	luzhian	32	1	汉族	10	1	1	1	1
483	2	lihui	33	1	汉族	13	1	2	1	1
484	2	helibo	40	1	汉族	11.0833	1	2	1	1
485	2	tanbin	36	1	汉族	10	2	1	1	1
487	2	zenghua	36	1	汉族	6	2	1	1	1
488	2	yanyufeng	33	1	汉族	11.6667	1	2	1	1
489	2	liuxiaowu	31	1	汉族	9.08333	2	1	1	1
490	2	yuehong	36	1	汉族	11.8333	2	1	1	1
491	2	xunjunsha	40	1	汉族	15	2	1	1	1
492	2	liuyongfeng	37	1	汉族	17.0833	1	1	1	1
493	2	tangtao	39	1	汉族	16.4167	1	2	1	1
494	2	shengqiangxing	47	1	汉族	20.6667	1	2	1	1
495	2	liwei	28	1	汉族	12.1667	1	1	2	2
496	2	yangyanshuo	25	1	汉族	2	2	1	1	1
497	2	shichangping	36	1	汉族	3	1	1	1	1
498	2	oubin	29	1	汉族	9.5	2	1	1	1
499	2	huangqin	29	1	汉族	2.08333	1	1	1	1
500	2	taofangyuan	36	1	汉族	2.16667	2	1	1	1
501	2	jiangjianbing	39	1	汉族	7	1	2	1	1
502	2	huzhongping	32	1	汉族	3.16667	1	1	1	1
503	2	tianzulin	38	1	汉族	10	2	1	1	1
504	2	yangfeng	21	1	汉族	5	1	2	1	2
505	2	dongguoxin	34	1	汉族	10	1	2	2	2
506	2	yaojun	35	1	汉族	12	1	1	1	1
507	2	zhoujia	31	1	汉族	7.58333	2	1	1	1
508
509	2	wangren	38	1	汉族	11	1	2	1	1
510	2	zengwenbo	34	1	汉族	1.66667	2	1	1	1
511	2	yangqichao	33	1	汉族	9	2	1	1	1
512	2	duyunting	37	1	汉族	4.75	2	1	1	1
513	2	liuxuan	21	1	汉族	6.33333	1	1	2	1
514	2	zhangzuohui	37	1	汉族	11	1	2	1	1
515	2	fujianlai	32	1	汉族	7	1	1	1	1
516	2	zhangzhiming	43	1	汉族	18.4167	1	1	1	1
517	2	luowei	32	1	汉族	11	1	1	1	1
519	2	liquanhua	38	1	汉族	15.5	1	2	1	1
520	2	yujinbao	32	1	汉族	12	2	1	1	1
521	2	lijike	28	1	汉族	11.5	2	2	2	1
522	2	changqing	44	1	汉族	15.6667	1	2	1	2
524	2	zhouxiangyang	35	1	汉族	13.75	2	2	1	1
525	2	xiaojun	35	1	汉族	9.33333	2	1	1	1
526	2	changwei	35	1	汉族	15.8333	2	1	1	1
527	2	zhushuangwu	36	1	汉族	12.5833	1	2	1	1
528	2	zengzhikai	22	1	汉族	7	2	2	2	2
530	2	wuzhongming	38	1	汉族	14	2	1	1	1
531	2	zhangbisong	40	1	汉族	7.33333	1	2	1	1
534	2	liangkuanxing	48	1	汉族	10.5833	2	1	1	1
535	2	wangyuchang	22	1	汉族	5	1	1	1	1
536	2	luojibin	24	1	汉族	6.16667	1	1	2	2
537	2	luoyiqun	24	1	汉族	2.83333	1	1	1	1
538	2	liuhanguo	29	1	汉族	8.5	2	1	1	1
539	2	lilingfeng	21	1	汉族	3.83333	2	1	1	1
540	2	liuzhengqiang	43	1	汉族	12.0833	2	1	1	1
541	2	tanminggan	29	1	汉族	5	2	2	1	1
542	2	xiaoyuejin	50	1	汉族	17	2	1	1	1
543	2	liuyongguang	35	1	汉族	10.8333	1	1	1	1
544	2	chenguanxi	33	1	汉族	11.8333	2	1	1	1
545	2	duanwenhua	33	1	汉族	7.16667	1	2	1	1
546	2	lizhaohui	42	1	汉族	11.4167	1	1	1	1
547	2	zhutao	38	1	汉族	6	1	1	1	1
548	2	tangjun	30	1	汉族	13	1	2	1	1
549	2	yaopeishu	40	1	汉族	18.3333	1	2	1	1
550	2	liuli	24	1	汉族	4.16667	2	1	2	2
551	2	zengjunying	43	1	汉族	5.25	1	1	1	1
552	2	gaohongshou	34	1	汉族	14.1667	1	1	1	1
553	2	zhangliqiang	40	1	汉族	7	1	1	1	1
555	2	shenjianbo	31	1	汉族	3.66667	1	1	1	1
B	2	冯专生	24	2	汉族	7.83333	2	1	2	1
B1	2	zoujing	33	2	汉族	12.5	2	1	2	1
B2	2	liulihong	23	2	汉族	4.41667	1	1	1	1
B3	2	liuping	41	2	汉族	14.25	1	1	1	1
B4	2	lijuan	21	2	少数民族	2	2	2	2	2
B5	2	liudan	42	2	汉族	16.25	1	1	1	1
B6	2	duanxiyun	35	2	汉族	10.3333	1	1	1	1
B7	2	guohong	26	2	汉族	7	1	1	2	2
B8	2	chenyouli	28	2	汉族	5.83333	1	1	1	1
B9	2	yanwei	23	2	汉族	10.0833	1	1	2	1
B10	2	liuqiang	32	2	汉族	13.3333	1	1	2	1
B11	2	hurong	32	2	汉族	5.08333	1	1	1	1
B12	2	daiyufeng	30	2	汉族	11.0833	1	1	1	1
B13	2	liucijuan	26	2	汉族	2.25	1	1	1	1
B14	2	zhaoliuyan	22	2	少数民族	6.33333	1	1	2	2
B15	2	caoxiaotao	30	2	汉族	3.75	1	1	1	1
B16	2	xunmeixiang	28	2	汉族	10	2	2	2	2
B17	2	songhuimei	37	2	汉族	0.916667	1	1	1	1
B18	2	chendongxiou	30	2	汉族	12.75	1	1	1	1
B19	2	zhangwenying	43	2	汉族	20.1667	1	1	1	1
B20	2	tangling	21	2	汉族	8.83333	2	2	1	1
B21	2	chenxiaoping	26	2	汉族	2.25	1	1	1	1
B22	2	zhangfang	31	2	汉族	13.75	1	1	1	1
B23	2	liyan	39	2	汉族	7.83333	1	1	1	1
B24	2	zhuchunhua	46	2	汉族	6.5	2	1	1	1
B25	2	zhoufanni	28	2	汉族	10.5	2	1	1	1
B26	2	yangxiaoyan	36	2	少数民族	12.5	2	2	1	1
B27	2	xuyan	27	2	汉族	9.66667	1	1	1	1
B28	2	yuanhua	32	2	汉族	12	1	1	1	1
B29	2	chendan	30	2	汉族	12	1	1	2	1
B30	2	tiancuihua	35	2	汉族	15.75	2	2	1	1
B31	2	wangxuhui	41	2	汉族	19.25	1	1	1	1
B32	2	yangfang	29	2	汉族	3.66667	1	2	1	1
B33	2	jiangyanping	34	2	汉族	14.5833	1	2	1	1
B34	2	hejianming	47	2	汉族	22	1	1	1	1
B35	2	fuhuiju	33	2	汉族	12.4167	2	1	1	1
B36	2	lvyanfang	25	2	汉族	4.08333	1	1	1	1
B37	2	huangmeijuan	26	2	汉族	10.4167	1	2	1	1
B38	2	qiudehua	34	2	汉族	15	1	1	1	1
B39	2	wuguiping	28	2	汉族	8.16667	1	1	1	1
B40	2	hehongqi	40	2	汉族	16.25	1	1	1	1
B41	2	tangmeijun	27	2	少数民族	9.41667	1	1	1	1
B42	2	yaomuhua	28	2	汉族	11.25	1	2	1	1
B43	2	xiaolinghua	29	2	汉族	9.91667	1	2	1	1
B44	2	zhangronghua	31	2	汉族	11.6667	2	2	1	1
B45	2	yanghegui	45	2	汉族	20.5	1	1	1	1
B46	2	chenqing	34	2	汉族	12.25	1	1	1	1
B47	2	xiaohuali	33	2	汉族	14.75	1	1	1	1
B48	2	chenfan	42	2	汉族	19.5	1	1	1	1
B49	2	zhangtao	28	2	汉族	12.5	1	1	2	1
B50	2	zhangna	31	2	汉族	15.5	2	1	1	1
B51	2	xiemeimei	22	2	汉族	5.5	2	1	2	1
B52	2	huangyougui	36	2	汉族	8.41667	1	1	1	1
B53	2	lvchan	28	2	汉族	9.58333	1	1	1	1
B54	2	tangjinyu	37	2	汉族	15.5833	1	1	1	1
B55	2	liuyongxing	36	2	汉族	19.5	1	2	1	1
B56	2	jiangliyun	35	2	汉族	4.75	1	1	1	1
B57	2	luolu	30	2	汉族	5.5	1	2	1	1
B58	2	lijuxiang	28	2	汉族	4.5	1	1	1	1
B59	2	penglin	27	2	汉族	11.9167	1	1	2	1
B60	2	zhangyuanmei	32	2	汉族	14.5	1	2	1	1
B61	2	sunqinglian	30	2	汉族	7.08333	1	1	1	1
B62	2	yangpingmei	24	2	汉族	8.83333	2	2	1	1
B63	2	chenzhifang	21	2	汉族	7.5	1	1	1	1
B64	2	songyuling	44	2	汉族	13	1	2	1	1
B65	2	liuyue	45	2	汉族	10.5833	1	1	1	1
B66	2	zhouhui	25	2	少数民族	9	1	1	1	1
B67	2	luohengxiang	31	2	汉族	15.5	2	1	2	1
B68	2	dengkaichen	30	2	汉族	14.5833	2	1	2	1
B69	2	zhouting	22	2	汉族	3.58333	2	1	2	1
B70	2	liulifeng	45	2	汉族	11.5833	2	2	1	1
B71	2	xujiangfei	31	2	汉族	8.58333	2	2	1	1
B72	2	liumeihui	39	2	汉族	14.25	1	1	1	1
B73	2	liuyajuan	25	2	汉族	9.25	1	1	1	1
B74	2	daihuifang	41	2	汉族	5.41667	1	1	1	1
B75	2	liuhui	35	2	汉族	11.1667	1	1	1	1
B76	2	liuqiaoying	37	2	汉族	1.5	1	1	1	1
B77	2	huangjing	31	2	汉族	12.25	1	1	1	1
B78	2	不详, 临床资料未收集		2
B79	2	chenyunqing	38	2	汉族	1.66667	1	1	2	1
B80	2	wuyuequn	40	2	汉族	10.25	1	2	1	1
B81	2	niechun	34	2	汉族	13.5	1	1	1	1
B82	2	liaohuilin	24	2	汉族	3.83333	2	1	2	2
B83	2	huangzhen	24	2	汉族	4.08333	2	2	1	1
B84	2	zhouxiaomei	40	2	汉族	15.5833	1	2	1	1
B85	2	leixilin	34	2	汉族	4.75	1	2	1	1
B86	2	不详, 临床资料未收集		2
B87	2	lilin	43	2	汉族	18.6667	2	2	2	2
B88	2	liaobeizhan	42	2	汉族	5	1	1	1	1
B89	2	不详, 临床资料未收集		2
B90	2	wanglilan	30	2	汉族	10.5833	1	2	1	1
B91	2	zhouyuanxiang	26	2	汉族	5.58333	1	1	1	1
B92	2	不详, 临床资料未收集		2
B93	2	wenjihong	36	2	汉族	14.3333	1	1	1	2
B94	2	suping	24	2	汉族	8.16667	1	1	2	1
B95	2	xianglili	20	2	少数民族	2.91667	1	1	1	1
B96	2	caimengjiao	29	2	汉族	7.16667	2	2	1	1
B97	2	maojing	38	2	汉族	16	1	1	1	1
B98	2	yueyongjun	35	2	汉族	15.1667	1	1	1	1
B99	2	chenzhiyuan	54	2	汉族	16.1667	2	1	1	1
B100	2	liumeili	31	2	汉族	8.58333	1	1	2	1
B101	2	yijianhua	47	2	汉族	20	1	1	1	1
B102	2	liyu	22	2	汉族	4	1	1	1	1
B103	2	helijun	37	2	汉族	17.5	1	2	1	1
B104	2	zhangxiaoyan	37	2	汉族	16	2	1	1	1
B105	2	fanying	37	2	汉族	18	1	1	1	1
B106	2	wangyu	42	2	汉族	17	2	1	2	2
B107	2	yangqiuhua	22	2	少数民族	4.16667	1	2	2	2
B108	2	licai	26	2	汉族	4	1	1	2	2
B109	2	zouyi	35	2	汉族	17.5	1	1	1	1
B110	2	dixia	32	2	汉族	10.0833	1	1	1	1
B111	2	luojiao	28	2	汉族	7.91667	1	2	1	1
B112	2	guolin	30	2	汉族	11.5	2	1	1	2
B113	2	xieyan	38	2	汉族	18.5833	1	1	1	1
B114	2	yuanhaiyong	35	2	汉族	16.75	2	2	1	1
B115	2	luomeihong	33	2	汉族	11	2	2	1	1
B116	2	xuping	36	2	汉族	11.5	1	1	1	1
B117	2	yinyan	20	2	汉族	3.75	1	1	1	2
B118	2	yangping	26	2	汉族	8.75	1	1	1	1
B119	2	pengli	38	2	汉族	10	1	1	1	1
B120	2	zhouhui	33	2	汉族	14	2	1	1	1
B121	2	huangyongjiao	41	2	汉族	17.5	1	1	1	1
B122	2	xiaokun	25	2	汉族	10.3333	1	1	2	1
B123	2	lixingfei	35	2	汉族	15.5	2	1	1	1
B124	2	liangzhihong	22	2	汉族	6	1	1	1	2
B125	2	liubo	32	2	汉族	18	2	1	1	1
B126	2	yanglixin	45	2	汉族	14.9167	2	1	1	1
B127	2	tanminggui	28	2	汉族	9.83333	2	2	1	1
B128	2	duanxiuhong	27	2	汉族	6.58333	1	1	1	1
B129	2	zhangyuanxiu	34	2	汉族	12.5833	1	2	1	1
B130	2	huangyali	31	2	汉族	13.6667	1	2	1	1
B131	2	wangxiaochun	33	2	汉族	10.1667	1	1	1	1
B132	2	caojing	21	2	汉族	5.33333	1	2	2	2
B133	2	不详, 临床资料未收集		2
B134	2	tangxianhua	32	2	汉族	15.5833	1	1	2	1
B135	2	wenling	28	2	汉族	8.16667	1	1	1	1
B136	2	chenqiong	33	2	汉族	11	1	1	1	1
B137	2	yangyouxiu	34	2	汉族	1.41667	1	1	1	1
B138	2	maqingqing	26	2	汉族	2.83333	1	1	2	2
B139	2		39	2	汉族	12	1	1	1	1
B140	2	yangbing	39	2	汉族	12	2	2	1	1
B141	2	liuxiqun	43	2	汉族	11.5	1	1	1	1
B142	2	pengli	30	2	汉族	4.25	1	1	1	1
B143	2	huangjihong	26	2	汉族	10	2	1	1	1
B144	2	chenhaizhen	20	2	汉族	3	1	1	1	1
B145	2	lixiaoling	28	2	汉族	13.6667	1	2	1	1
B146	2	fanshouzhen	42	2	汉族	18	1	2	1	1
B147	2	tanxiuping	30	2	汉族	6.33333	2	1	1	1
B148	2	guoyanhua	39	2	汉族	16.6667	1	1	1	1
B149	2	zhouliangying	34	2	汉族	12	2	1	1	1
B150	2	lixiaoru	45	2	汉族	10.25	1	1	1	1
B151	2	liyan	28	2	汉族	11.25	2	2	1	2
B152	2	fulingling	41	2	汉族	21.1667	2	2	1	1
B153	2	yuandefeng	38	2	汉族	12.1667	1	2	1	1
B154	2	zhangping	40	2	汉族	4.33333	1	1	1	1
B155	2	longhaizhen	44	2	汉族	17.5	1	1	1	1
B156	2	chenlian	40	2	汉族	6.5	1	2	1	1
B157	2	zhangjin	22	2	汉族	6.66667	1	2	2	1
B158	2	liujing	27	2	汉族	7.25	2	1	1	2
B159	2	huanglinghua	26	2	汉族	7.33333	1	1	1	1
B160	2	hemeihua	33	2	汉族	6	1	1	1	1
B161	2	hejinlian	40	2	汉族	7.91667	1	2	1	1
B162	2	tianliu	25	2	汉族	8.25	1	1	1	2
B163	2	zengjianping	32	2	汉族	9.33333	1	1	1	1
B164	2	zhangbifen	36	2	汉族	11.25	1	2	1	1
B165	2	liuqing	34	2	汉族	11.1667	1	1	1	1
B166	2	libing	21	2	少数民族	3.66667	2	2	2	2
B167	2	duanxiaohong	26	2	汉族	9	1	1	1	1
B168	2	wangxiaohong	25	2	汉族	2.66667	1	2	1	1
B169	2	zhushaoqun	37	2	少数民族	7.33333	1	1	1	1
B170	2	jiangyan	32	2	汉族	14.5	1	1	1	1
B171	2	luoxiaozuo	46	2	汉族	13.5	1	1	1	1
B172	2	lili	25	2	汉族	7.75	2	1	1	1
B174	2	chawenyu	36	2	汉族	11	1	1	1	1
B175	2	likangli	35	2	汉族	16.5	2	1	1	1
B176	2	xiongxianghong	35	2	汉族	2.91667	1	2	1	1
B177	2	lihongwei	42	2	汉族	18.25	1	1	1	1
B178	2	lizhen	40	2	汉族	15.25	1	2	2	1
B179	2	chenliaozhen	30	2	汉族	2.16667	1	1	2	1
B180	2	huangyan	41	2	汉族	17.6667	1	1	1	1
B181	2	liuqingfei	30	2	汉族	14.4167	2	1	1	1
B182	2	xiaoguangliu	37	2	汉族	17.3333	1	1	1	1
B183	2	rongping	36	2	汉族	12.1667	2	2	1	1
B184	2	liukaixin	35	2	汉族	6.16667	1	1	1	1
B185	2	wanghuaying	27	2	汉族	3	1	1	1	1
B186	2	xiexiaoli	26	2	汉族	10.6667	2	1	1	1
B187	2	kongdeli	28	2	汉族	11.25	2	1	2	2
B188	2	chencuiyuan	22	2	汉族	5.5	2	1	2	2
B189	2	zhoujianping	47	2	汉族	12.25	1	1	1	1
B190	2	songpeng	24	2	少数民族	4.33333	1	2	1	1
B191	2	liuxin	24	2	汉族	8.41667	1	1	1	1
B192	2	qinhongjin	23	2	少数民族	4.58333	1	1	1	1
B193	2	lixiaobin	33	2	汉族	16.5833	1	1	1	1
B194	2	lijia	30	2	汉族	14.5833	2	1	1	1
B195	2	liuxia	28	2	汉族	11.5833	1	2	2	2
B196	2	dongyan	44	2	汉族	15.5833	1	1	1	1
B197	2	lizhen	21	2	汉族	3.25	1	1	2	2
B198	2	zhangwusheng	32	2	汉族	4.33333	1	1	1	1
B199	2	dingwenting	27	2	少数民族	10.5833	1	2	1	1
B200	2	kangxiaohong	32	2	汉族	8.58333	1	2	1	1
B201	2	suyanxiang	36	2	汉族	12.5833	1	1	1	1
B202	2	huanghongyan	28	2	汉族	2.58333	2	1	2	1
B203	2	caojianyue	34	2	汉族	4	2	1	2	2
B204	2	zouyin	26	2	汉族	6.41667	2	2	2	2
B205	2	hexiudong	43	2	汉族	20.4167	1	1	1	1
B206	2	gaoxiaochun	29	2	汉族	5.75	1	1	1	1
B207	2	liangyonglian	45	2	汉族	20.5833	1	2	1	1
B208	2	cuihui	38	2	汉族	16.8333	2	1	1	1
B209	2	不详, 临床资料未收集		2
B210	2	tancong	24	2	汉族	5.41667	1	2	2	1
B211	2	zhouaihua	43	2	汉族	19.5	2	1	1	1
B212	2	wuhaiyan	27	2	汉族	4	1	1	1	1
B213	2	wangguilan	46	2	汉族	19.25	2	1	1	1
B214	2	pengyimei	37	2	汉族	14.5	1	1	2	2
B215	2	cuilihong	27	2	汉族	12	1	2	2	1
B216	2	shijingmei	28	2	汉族	9.33333	1	2	1	2
B217	2	jiangfenglian	34	2	汉族	9.08333	2	1	2	2
B218	2	zhouli	36	2	汉族	13.5	1	1	1	1
B219	2	lizuoling	29	2	汉族	5.75	1	1	1	1
B220	2	guanhuaying	33	2	汉族	5.33333	1	1	1	1
B221	2	zoujing	32	2	汉族	11.0833	2	2	1	1
B222	2	liyan	38	2	汉族	7.41667	1	1	1	1
B223	2	huangyingfei	35	2	汉族	16.3333	1	1	1	1
B224	2	luozaidi	17	2	汉族	2.08333	2	1	2	1
B225	2	dengaijun	46	2	汉族	19.25	1	1	1	1
B226	2	baidan	37	2	汉族	16.6667	1	2	1	1
B227	2	liuyan	34	2	汉族	11.5833	2	1	1	1
B228	2	yaokaiyun	40	2	汉族	9.16667	1	1	1	1
B229	2	cuiaihua	30	2	汉族	4.41667	1	1	1	1
B230	2	guohaiyan	37	2	汉族	6.58333	1	1	2	1
B231	2	zhoulihong	36	2	汉族	16.5	1	1	1	1
B232	2	xiehaona	32	2	汉族	2.91667	1	1	1	2
B233	2	zhangying	46	2	汉族	15.5833	1	1	1	1
B234	2	xiexiaohong	31	2	汉族	13.0833	1	1	1	1
B235	2	tanqinlin	28	2	汉族	12.5833	1	1	1	1
B236	2	chenxujiao	32	2	汉族	13	1	2	2	1
B238	2	wangsai	35	2	汉族	16.25	1	2	1	1
B239	2	不详, 临床资料未收集		2
B240	2	tanbitao	45	2	汉族	12.75	2	2	1	1
B241	2	guohui	28	2	汉族	3	1	2	1	2
B242	2	yangjuan	30	2	少数民族	11.25	1	2	1	1
B243	2	ronggui	37	2	汉族	16	1	1	1	1
B244	2	caiyaning	25	2	汉族	10.25	1	2	1	1
B245	2	liyingjiao	34	2	汉族	14.5	1	1	1	2
B246	2	xianghonglian	24	2	少数民族	4.41667	1	1	1	1
B247	2	zhouhuan	21	2	汉族	6.5	1	1	2	1
B248	2	jianlijuan	25	2	汉族	3.75	1	1	2	1
B249	2	huangliangliang	24	2	汉族	6.25	2	2	1	1
B250	2	moxiaohong	38	2	汉族	10.25	1	1	1	1
B251	2	huangyanni	31	2	汉族	5.66667	1	1	1	1
B252	2	chenmei	22	2	汉族	5.58333	1	1	1	1
B253	2	liqiongni	19	2	汉族	3	1	1	1	1
B254	2	yangliu	27	2	汉族	11.1667	1	2	1	2
B255	2	huangyaqing	25	2	少数民族	7.58333	1	1	2	2
B256	2	pengyilin	36	2	汉族	18.0833	1	1	1	1
B257	2	不详, 临床资料未收集		2
B258	2	huangbin	27	2	汉族	10.5833	1	1	1	1
B259	2	liuhuifang	21	2	汉族	2.83333	1	2	1	1
B260	2	zhangxuemei	35	2	少数民族	16.25	2	2	1	1
B261	2	caoqun	24	2	汉族	9	1	1	1	1
B262	2	yangwenfang	23	2	汉族	8	1	2	1	1
B263	2	zouxiajing	47	2	汉族	10.8333	1	1	1	1
B264	2	dengjunlin	40	2	汉族	20.5	1	1	1	1
B265	2	huangfengzhi	44	2	汉族	22.5	1	1	1	1
B266	2	guhaiye	27	2	汉族	7.33333	1	1	2	1
B267	2	xiaojiating	29	2	汉族	11.5	1	1	1	1
B268	2	gaoxiaoyan	25	2	少数民族	4.25	1	1	1	1
B269	2	zhoushan	21	2	汉族	0.5	1	1	2	1
B270	2	gongjine	45	2	汉族	13.5	1	1	1	1
B271	2	hujialu	21	2	汉族	4.41667	1	1	2	2
B272	2	longyan	29	2	汉族	10.5833	2	1	1	1
B273	2	hejianying	37	2	汉族	10	1	1	1	1
B274	2	raochunzhu	40	2	汉族	1.41667	1	1	1	1
B275	2	zhangyan	28	2	汉族	4.16667	1	1	2	2
B276	2	wenjianhong	39	2	汉族	13.9167	1	1	1	1
B277	2	liuxiaoman	25	2	汉族	10.0833	2	2	1	1
B278	2	moxiuping	23	2	汉族	5.16667	1	1	1	1
B279	2	zhoufenfang	27	2	汉族	8.33333	1	1	1	1
B280	2	chencong	24	2	汉族	2.66667	1	1	1	1
B281	2	chenlin	36	2	汉族	15.75	2	1	1	1
B282	2	yangxu	34	2	汉族	4.5	2	1	1	1
B283	2	xiongronglan	30	2	汉族	9.16667	2	1	2	2
B284	2	wangweiping	30	2	汉族	5.08333	1	1	1	1
B285	2	lifang	28	2	汉族	10.5	2	2	1	1
B286	2	wenxianzhen	46	2	汉族	11.4167	1	1	1	1
B288	2	huangyiping	41	2	汉族	18.8333	1	1	1	1
B289	2	yangshengying	35	2	汉族	15.1667	1	1	1	1
B290	2	lubaojuan	30	2	汉族	12	2	2	1	1
B291	2	chenghuiling	30	2	汉族	11.4167	1	1	1	2
B292	2	pengweifeng	27	2	汉族	11.0833	2	2	2	2
B293	2	pengguilan	46	2	汉族	20	1	1	1	1
B294	2	xieliqiong	28	2	汉族	8.75	1	1	1	1
B295	2	fanxuechun	29	2	少数民族	9.91667	1	2	1	1
B296	2	zhangping	28	2	汉族	11.6667	1	1	2	2
B297	2	heaihua	26	2	汉族	13	2	1	2	1
B298	2	lvfeifei	35	2	汉族	9.16667	1	1	1	1
B299	2	yangmanlin	24	2	汉族	5.66667	1	1	1	1
B300	2	ouyangronghua	31	2	汉族	14.4167	2	2	1	1
B301	2	liaoxiaorong	36	2	汉族	13.3333	1	2	1	1
D	2	贺双龙
D	2	李林芳（不符合2诊断,排除）
D	2	陶晓红(未收集临床资料)
D1	2	wangyi	38	1	汉族	4.08333	2	1	1	1
D2	2	liuhuiyi (D2)	33	1	汉族	12.5833	1	1	1	1
D4	2	luojinghua	30	1	汉族	11	1	1	1	1
D6	2	wangyan	40	2	汉族	1	1	1	1	1
D8	2	liujianfang	32	2	汉族	9.25	1	1	1	1
D9	2	lijianjun	31	1	汉族	6	1	1	1	1
D10	2	penglinbo	33	1	汉族	9.33333	1	1	1	1
D11	2	zhanghua	31	1	汉族	14.75	2	1	1	1
D12	2	maohengyong	40	1	汉族	11	1	1	1	1
D13	2	zengjian	31	1	汉族	9	1	1	1	1
D16	2	zhaochenggong	33	1	汉族	15	2	1	1	1
D17	2	hezhihua	35	1	汉族	3	2	1	1	1
D18	2	zhangdibing	26	1	汉族	13.4167	1	1	1	1
D19	2	heguanghui	31	1	汉族	16.75	2	1	1	1
D20	2	xiayunjia	38	1	汉族	6.25	2	1	1	1
D32	2	suhaichang	33	1	汉族	10	1	1	1	1
D34	2	chenjun	40	1	汉族	7.75	1	2	1	1
D35	2	yuanbincheng	38	1	汉族	12.25	2	1	1	1
D36	2	aixinfa	38	1	汉族	3.33333	1	1	1	1
D37	2	ouyangjun	37	1	汉族	9.83333	1	1	1	1
D40	2	不详, 临床资料未收集
D43	2	liuqiang	38	1	汉族	1	1	1	1	1
D45	2	tangboyan	32	1	汉族	13	1	1	1	1
D47	2	tanglike(唐立克）	44	1	汉族	4.25	1	1	1	1
D50	2	jiangliang	27	1	汉族	8.58333	2	1	2	2
D52	2	xiaogaoquan	23	1	汉族	2.5	1	1	1	1
D53	2	liuxiaocong	26	2	汉族	10	1	1	1	1
D56	2	不详, 临床资料未收集		1
D57	2	libin (D57-a)	27	1	汉族	3	1	1	1	1
D58	2	liujianfei	28	1	汉族	8.58333	1	1	1	2
D59	2	zengzhenzhong		1
D60	2	chenjun	35	1	汉族	19.8333	1	1	1	1
D61	2	wuyuanlong	30	1	少数民族	5.33333	2	1	1	1
D63	2	xiaozhushou (肖祝寿)	25	1	汉族	6	1	1	2	1
D65	2	lejieliang	36	1	汉族	6.75	2	1	1	1
D66	2	heqihui(何启辉)	26	1	汉族	18	1	2	1	1
D68	2	wangjie	29	1	汉族	1.5	1	1	1	1
D71	2	liujin	29	1	汉族	4	1	1	1	1
D72	2	xiaoli	27	1	汉族	0.666667	1	1	1	1
D73	2	chencangrong	40	1	汉族	12	1	1	1	1
D74	2	lijiacong	25	1	汉族	5	1	1	1	1
D75	2	caonanning	56	1	汉族	19.5	1	1	1	1
D76	2	fangzhihong	30	2	汉族	4	2	1	1	1
D78	2	yanxingwu(晏行武)	38	1	汉族	12	1	1	1	1
D81	2	liuzhengqi	28	1	汉族	8	1	1	2	2
D82	2	tangye(D82-a)	46	1	汉族	10.4167	1	1	1	1
D83	2	lijia	21	1	汉族	5.83333	1	1	2	1
D84	2	huangbin	33	1	汉族	17.9167	1	1	1	1
D86	2	liujianjun (刘建军)	36	1	汉族	4	1	1	1	1
D88	2	fanyan	31	1	汉族	4.33333	1	1	1	1
D94	2	tianyiming	34	1	少数民族	9.33333	2	1	1	2
D95	2	zhubiao(朱彪)	40	1	汉族	15	1	1	1	1
D96	2	yunyeda	23	1	汉族	10	1	2	1	1
D98	2	zhuyingping	26	1	汉族	8	2	2	1	1
D99	2	yanshan	26	1	汉族	8	1	1	1	1
D100	2	jiangpeng	27	1	汉族	9	1	1	1	1
D101	2	wangjianhua	35	1	汉族	10	1	1	1	1
D102	2	不详, 临床资料未收集		1
D104	2	xiexin	27	1	汉族	9	2	1	1	1
D105	2	zhangxinming	32	1	汉族	16	2	1	2	1
D106	2	zengronghua(曾荣华)	30	1	汉族	4	2	1	1	1
D107	2	luojing(罗京)	26	1	汉族	1	1	1	1	1
D108	2	lirongfei(李荣飞）	21	1	汉族	3.5	1	1	1	1
D109	2	yunyiyu	34	1	汉族	16.6667	2	2	2	2
D110	2	denglinming(邓林明)	25	1	汉族	6	1	2	1	1
D113	2	niushi(牛施)	22	2	汉族	5.33333	1	1	1	1
D114	2	lijunxiang (李俊湘)	30	1	汉族	11.0833	1	1	1	1
D115	2	xiazan(夏赞)	30	1	汉族	9.83333	1	1	1	1
D116	2	zengronghua	34	1	汉族	3.41667	1	1	1	1
D118	2	yitao(易涛）	33	1	汉族	13.4167	1	1	1	1
D119	2	dushengzhen(杜胜真)	41	1	汉族	18.6667	1	1	1	1
D120	2	不详, 临床资料未收集		1
D121	2	chenqiang	35	1	汉族	14	2	1	1	1
D123	2	sunfangming	29	1	汉族	8	1	1	1	1
D125	2	shuqian(舒倩)	23	1	汉族	9	1	1	1	2
KA1	1		26	1
KA2	1		43	1
KA3	1		29	1
KA4	1		45	1
KA5	1		38	1
KA6	1		27	1
KA7	1		24	1
KA8	1		43	1
KA9	1		27	1
KA10	1		46	1
KA11	1		37	1
KA12	1		27	1
KA13	1		28	1
KA14	1		34	1
KA15	1		36	1
KA16	1		29	1
KA17	1		33	1
KA18	1		32	1
KA19	1		38	1
KA20	1		35	1
KA21	1		20	1
KA22	1		46	1
KA23	1		37	1
KA24	1		34	1
KA25	1		40	1
KA26	1		30	1
KA27	1		37	1
KA28	1		36	1
KA29	1		32	1
KA30	1		46	1
KA31A	1	31-a	不详	1
KA31B	1	31-b	22	1
KA32	1		31	1
KA33	1		28	1
KA34	1		32	1
KA35	1		32	1
KA36	1		35	1
KA37	1		28	1
KA38	1		45	1
KA39	1		28	1
KA40	1		30	1
KA41	1		37	1
KA42	1		25	1
KA43	1		34	1
KA44	1		24	1
KA45	1		32	1
KA47	1		31	1
KA49	1		33	1
KA50	1		31	1
KA51	1		40	1
KA52	1		31	1
KA53	1		30	1
KA54	1		31	1
KA55	1		33	1
KA56	1		35	1
KA57	1		26	1
KA58	1		31	1
KA59	1		38	1
KA60	1		28	1
KA61	1		28	1
KA62	1		30	1
KA63	1		34	1
KA64	1		26	1
KA65	1		21	1
KA66	1		45	1
KA67	1		30	1
KA68	1		36	1
KA69	1		33	1
KA70	1		27	1
KA71	1		33	1
KA72	1		38	1
KA73	1		40	1
KA74	1		38	1
KA75	1		38	1
KA76B	1		37	1
KA78	1		44	1
KA79	1		33	1
KA80	1		26	1
KA81	1		33	1
KA82	1		30	1
KA83	1		38	1
KA84	1		34	1
KA85	1		32	1
KA86	1		28	1
KA87	1		44	1
KA88	1		35	1
KA89	1		27	1
KA90	1		27	1
KA91	1		21	1
KA92	1		23	1
KA93	1		26	1
KA94	1		31	1
KA95	1		27	1
KA97	1		35	1
KA98	1		27	1
KA101	1		28	1
KA102	1		27	1
KA103	1		35	1
KA104	1		30	1
KA105	1		26	1
KA106	1		25	1
KA107	1		38	1
KA108	1		36	1
KA109	1		32	1
KA110	1		43	1
KA111	1		43	1
KA112	1		26	1
KA113a	1	113-a	32	1
KA113b	1	113-b	40	1
KA114	1		30	1
KA115	1		38	1
KA116	1		41	1
KA118	1		46	1
KA119	1		37	1
KA120	1		34	1
KA121	1		23	1
KA122	1		48	1
KA123	1		42	1
KA124	1		20	1
KA125	1		36	1
KA126	1		28	1
KA127	1		45	1
KA128	1		36	1
KA129	1		40	1
KA130	1		36	1
KA131	1		42	1
KA132	1		35	1
KA133	1		29	1
KA134	1		29	1
KA135	1		40	1
KA136	1		35	1
KA137	1		22	1
KA138	1		22	1
KA139	1		26	1
KA140	1		31	1
KA141	1		37	1
KA142	1		30	1
KA143	1		27	1
KA145	1		34	1
KA146	1		26	1
KA147	1		29	1
KA148	1		31	1
KA149	1		25	1
KA150	1		36	1
KA151	1		32	1
KA152	1		38	1
KA153	1		37	1
KA154a	1	154-a	38	1
KA154b	1	154-b	31	1
KA155	1		40	1
KA156	1		34	1
KA157	1		35	1
KA158	1		43	1
KA159	1		33	1
KA160	1		25	1
KA161	1		33	1
KA162	1		34	1
KA163	1		32	1
KA164	1		30	1
KA165	1		20	1
KA166	1		27	1
KA167	1		29	1
KA168	1		26	1
KA169	1		32	1
KA170	1		25	1
KA171	1		45	1
KA173	1		34	1
KA174	1		48	1
KA175	1		33	1
KA176	1		40	1
KA177	1		26	1
KA178	1		34	1
KA179	1		38	1
KA180	1		37	1
KA181	1		44	1
KA182	1		23	1
KA184	1		37	1
KA185a	1	185-a	34	1
KA185b	1	185-b	31	1
KA187	1		36	1
KA188	1		31	1
KA189	1		43	1
KA190	1		41	1
KA191	1		37	1
KA192	1		42	1
KA193a	1	193-a	38	1
KA193b	1	193-b	28	1
KA194	1		44	1
KA195	1		38	1
KA196	1		38	1
KA197	1		41	1
KA199	1		30	1
KA200	1		26	1
KA201	1		27	1
KA747	1		45	1
KB1	1		44	2
KB2	1		35	2
KB3	1		30	2
KB4	1		31	2
KB5	1		33	2
KB6	1		36	2
KB7	1		38	2
KB8	1		44	2
KB9	1		31	2
KB10	1		30	2
KB11A	1		32	2
KB12	1		26	2
KB13	1		32	2
KB14	1		41	2
KB15	1		34	2
KB16	1		34	2
KB17	1		34	2
KB18	1		38	2
KB19	1		41	2
KB20	1		32	2
KB21	1		31	2
KB22	1		43	2
KB23	1		32	2
KB24	1		40	2
KB25	1		46	2
KB26	1		37	2
KB27	1		32	2
KB28	1		27	2
KB29	1		40	2
KB30	1		26	2
KB31	1		36	2
KB48	1		44	2
KN1	1		23	2
KN2	1		30	2
KN4	1		35	2
KN5	1		38	2
KN6	1		32	2
KN7	1		24	2
KN8	1		29	2
KN9	1		38	2
KN10	1		40	2
KN11	1		46	2
KN12	1		27	2
KN14	1		29	2
KN15	1		35	2
KN16	1		26	2
KN17	1		28	2
KN18	1		21	2
KN19	1		28	2
KN20	1		44	2
KN21	1		42	2
KN23	1		27	2
KN24	1		32	2
KN25	1		36	2
KN26	1		47	2
KN27	1		27	2
KN28	1		36	2
KN29	1		36	2
KN30	1		43	2
KN32	1		54	2
KN33	1		36	2
KN34	1		46	2
KN35	1		34	2
KN36	1		32	2
KN37	1		26	2
KN38	1		36	2
KN39	1		44	2
KN40	1		38	2
KN41	1		33	2
KN42	1		32	2
KN43	1		29	2
KN44	1		30	2
KN45	1		25	2
KN46a	1	KN-46a	30	2
KN46b	1	KN-46b	38	2
KN47	1		43	2
KN48	1		40	2
KN49	1		26	2
KN50	1		20	2
KN51	1		24	2
KN52	1		32	2
KN54a	1	KN-54a	29	2
KN54b	1	KN-54b
KN55	1		47	2
KN56	1		38	2
KN57	1		31	2
KN58	1		30	2
KN59	1		29	2
KN60	1		36	2
KN61	1		28	2
KN62	1		33	2
KN63	1		25	2
KN64	1		27	2
KN65	1		29	2
KN66	1		30	2
KN67	1		33	2
KN69	1		28	2
KN70	1		33	2
KN71	1		29	2
KN72	1		29	2
KN73	1		40	2
KN74	1		33	2

## Sheet: Genotype validation
PedID	SubID	PaID	MaID	Sex	Disease status	S1	S3	S5	S29 Final	S29 Flora	S29 Siyu	Match	Dataset	remarked by Flora
1	1	0	0	1	2	G T	A G	C C	T C	T C		TRUE
2	4	0	0	1	2	G G	A G	T C	T C	T C		TRUE
3	5	0	0	1	2	G G	A A	T C	T T	T T		TRUE
4	7	0	0	1	2	G T	A G	N N	T C	T C		TRUE
5	9	0	0	1	2	G T	A G	T C	T C	T C		TRUE
6	10	0	0	1	2	G G	A G	T C	T T	T T		TRUE
7	11	0	0	1	2	G T	A G	T C	T C	T C		TRUE
8	12	0	0	1	2	G G	A A	T T	T T	T T		TRUE
9	13	0	0	1	2	N N	N N	N N	T T	T T		TRUE
10	14	0	0	1	2	N N	N N	N N	C C	C C		TRUE
11	15	0	0	1	2	G G	A A	T T	T T	T T		TRUE
12	16	0	0	1	2	G G	A A	T T	T T	T T		TRUE
13	17	0	0	1	2	G G	A G	T C	T C	T C		TRUE
14	20	0	0	1	2	N N	N N	N N	T C	T C		TRUE
15	21	0	0	1	2	G G	A A	T T	T T	T T		TRUE
16	23	0	0	1	2	G G	A A	T T	T T	T T		TRUE
17	24	0	0	1	2	G G	A A	N N	T T	T T		TRUE
18	25	0	0	1	2	G G	A A	T T	T T	T T		TRUE
19	26	0	0	1	2	G G	A A	T T	T T	T T		TRUE
20	27	0	0	1	2	G G	A A	T T	T T	T T		TRUE
21	29	0	0	1	2	G T	A G	T C	T C	T C		TRUE
22	30	0	0	1	2	G T	G G	C C	C C	C C		TRUE
23	31	0	0	1	2	G G	A G	T C	T C	T C		TRUE
24	34	0	0	1	2	G G	A G	C C	T C	T C		TRUE
25	36	0	0	1	2	G G	A A	T T	T T	T T		TRUE
26	38	0	0	1	2	G G	A A	T T	T T	T T		TRUE
27	39	0	0	1	2	N N	N N	N N	T C	T C		TRUE
28	40	0	0	1	2	G G	A A	T T	T T	T T		TRUE
29	41	0	0	1	2	G T	A G	T C	T C	T C		TRUE
30	42	0	0	1	2	G G	A A	T C	T T	T T		TRUE
31	43	0	0	1	2	G G	A A	T T	T T	T T		TRUE
32	44	0	0	1	2	G G	A A	T T	T T	T T	T T	FALSE	New	nucleotide No. 18 is A
33	45	0	0	1	2	G T	G G	C C	C C	C C		TRUE
34	47	0	0	1	2	G G	A A	T T	T T	T T		TRUE
35	48	0	0	1	2	G G	A A	T C	T T	T T		TRUE
36	49	0	0	1	2	G T	A G	T C	T C	T C		TRUE
37	50	0	0	1	2	G T	G G	C C	C C	C C		TRUE
38	51	0	0	1	2	G G	A A	T C	T T	T T		TRUE
39	52	0	0	1	2	G G	A A	T C	T T	T T		TRUE
40	53	0	0	1	2	G T	A G	T C	T C	T C		TRUE
41	54	0	0	1	2	G T	A G	T C	T C	T C		TRUE
42	55	0	0	1	2	G G	A A	T T	T T	T T		TRUE
43	56	0	0	1	2	N N	A A	N N	N N	N N		TRUE
44	57	0	0	1	2	G G	A A	T T	T T	T T		TRUE
45	58	0	0	1	2	G G	A A	T C	T T	T T		TRUE
46	59	0	0	1	2	G G	A A	T T	T T	T T		TRUE
47	60	0	0	1	2	G G	A A	T C	T T	T T		TRUE
48	61	0	0	1	2	G T	A G	T C	T C	T C		TRUE
49	62	0	0	1	2	G G	A A	T T	T T	T T		TRUE
50	63	0	0	1	2	G G	A G	T C	T T	T T		TRUE
51	64	0	0	1	2	G T	A G	C C	T C	T C		TRUE
52	65	0	0	1	2	G T	G G	C C	C C	C C		TRUE
53	66	0	0	1	2	N N	N N	N N	T T	T T		TRUE
54	67	0	0	1	2	G G	A G	T C	T T	T T		TRUE
55	68	0	0	1	2	G T	A G	T C	T C	T C		TRUE
56	69	0	0	1	2	G G	A A	T T	T T	T T		TRUE
57	70	0	0	1	2	G G	A A	T T	T T	T T		TRUE
58	72	0	0	1	2	G G	A G	T C	T T	T T		TRUE
59	73	0	0	1	2	G G	A G	T C	N N	N N		TRUE
60	74	0	0	1	2	G G	A A	T T	T T	T T		TRUE
61	75	0	0	1	2	G T	A G	T C	T C	T C		TRUE
62	76	0	0	1	2	G G	A A	T T	T T	T T		TRUE
63	77	0	0	1	2	G T	A G	T C	T C	T C		TRUE
64	80	0	0	1	2	G G	A A	T T	T T	T T		TRUE
65	82	0	0	1	2	G T	G G	C C	T C	T C		TRUE
66	83	0	0	1	2	G G	A A	T C	T T	T T		TRUE
67	84	0	0	1	2	G G	A A	T T	T T	T T		TRUE
68	86	0	0	1	2	G G	A A	T C	T T	T T		TRUE
69	87	0	0	1	2	G G	A A	T T	T T	T T		TRUE
70	88	0	0	1	2	T T	G G	C C	C C	C C		TRUE
71	89	0	0	1	2	G G	G G	N N	T C	T C		TRUE
72	91	0	0	1	2	G T	A A	N N	T T	T T		TRUE
73	92	0	0	1	2	G G	A A	T T	T T	T T		TRUE
74	93	0	0	1	2	G T	A G	T C	T C	T C		TRUE
75	94	0	0	1	2	G G	A A	T C	T T	T T		TRUE
76	95	0	0	1	2	G T	A G	T C	T C	T C		TRUE
77	96	0	0	1	2	G G	A A	T T	T T	T T		TRUE
78	102	0	0	1	2	N N	N N	N N	T C	T C		TRUE
79	103	0	0	1	2	G T	G G	C C	C C	C C		TRUE
80	104	0	0	1	2	G T	A G	T C	T C	T C		TRUE
81	105	0	0	1	2	G G	A A	T C	T T	T T		TRUE
82	107	0	0	1	2	G T	G G	N N	C C	C C		TRUE
83	108	0	0	1	2	N N	N N	N N	T T	T T		TRUE
84	109	0	0	1	2	N N	N N	N N	T T	T T		TRUE
85	114	0	0	1	2	G T	A G	T C	T C	T C		TRUE
86	115	0	0	1	2	G G	A A	T T	T T	T T		TRUE
87	116	0	0	1	2	G G	A A	T T	T T	T T		TRUE
88	117	0	0	1	2	G T	A G	T C	T C	T C		TRUE
89	118	0	0	1	2	G T	A G	N N	T C	T C		TRUE
90	120	0	0	1	2	G T	A G	N N	T C	T C		TRUE
91	122	0	0	1	2	G T	A G	T C	T C	T C		TRUE
92	123	0	0	1	2	G T	A G	C C	T T	T T		TRUE
93	124	0	0	1	2	G T	A G	T C	T C	T C		TRUE
94	125	0	0	1	2	G G	A A	T T	T T	T T	T T	FALSE	New	Nucleotide No. 14 is A
95	126	0	0	1	2	G G	A G	T C	T T	T T		TRUE
96	128	0	0	1	2	G G	A A	T C	T T	T T		TRUE
97	129	0	0	1	2	G T	A G	T C	T C	T C		TRUE
98	130	0	0	1	2	G G	A G	T C	T T	T T		TRUE
99	131	0	0	1	2	G G	A G	T C	T C	T C		TRUE
100	132	0	0	1	2	G G	A A	T T	T T	T T		TRUE
101	133	0	0	1	2	G G	A G	T C	T T	T T		TRUE
102	134	0	0	1	2	G T	A G	T C	N N	N N		TRUE
103	135	0	0	1	2	G T	A G	T C	T C	T C		TRUE
104	136	0	0	1	2	G T	A G	N N	T C	T C		TRUE
105	137	0	0	1	2	G G	A A	C C	T T	T T		TRUE
106	138	0	0	1	2	G G	A G	T C	T T	T T		TRUE
107	139	0	0	1	2	G T	A G	T C	T C	T C		TRUE
108	140	0	0	1	2	G T	A G	T C	T C	T C		TRUE
109	141	0	0	1	2	G G	A G	T C	N N	N N		TRUE
110	142	0	0	1	2	G G	A G	T C	T T	T T		TRUE
111	144	0	0	1	2	G G	G G	C C	C C	C C		TRUE
112	145	0	0	1	2	G G	A A	T T	T T	T T		TRUE
113	146	0	0	1	2	G G	A A	T T	T T	T T		TRUE
114	147	0	0	1	2	G G	A A	T T	T C	T C		TRUE
115	148	0	0	1	2	G G	A G	T C	N N	N N		TRUE
116	149	0	0	1	2	G G	A A	T T	T T	T T		TRUE
117	150	0	0	1	2	G G	A A	T C	T T	T T		TRUE
118	151	0	0	1	2	G G	A A	T T	T T	T T		TRUE
119	152	0	0	1	2	G T	A G	C C	T C	T C		TRUE
120	155	0	0	1	2	G G	A A	T C	N N	N N		TRUE
121	156	0	0	1	2	G G	G G	C C	N N	N N		TRUE
122	157	0	0	1	2	G G	A A	T T	N N	T T	N N	FALSE	New	Nucleotide No. 14 is A
123	159	0	0	1	2	G G	A A	T T	T T	T T	T T	FALSE	New	Nucleotide No. 15 is A
124	161	0	0	1	2	G G	A A	T C	T T	T T		TRUE
125	162	0	0	1	2	G G	A A	T C	T T	T T		TRUE
126	163	0	0	1	2	G G	A A	T T	T T	T T		TRUE
127	165	0	0	1	2	G T	A G	N N	N N	N N		TRUE
128	166	0	0	1	2	G G	A G	T C	T T	T T		TRUE
129	167	0	0	1	2	G T	A G	T C	T C	T C		TRUE
130	168	0	0	1	2	G G	A A	T T	T T	T T		TRUE
131	169	0	0	1	2	G G	A A	T T	T T	T T		TRUE
132	170	0	0	1	2	G G	A A	T T	T T	T T		TRUE
133	172	0	0	1	2	N N	N N	N N	N N	N N		TRUE
134	173	0	0	1	2	G G	A A	T C	T T	T T		TRUE
135	175	0	0	1	2	G G	A G	N N	T C	T C		TRUE
136	176	0	0	1	2	G G	A A	T T	T C	T C		TRUE
137	177	0	0	1	2	G G	A A	T T	T C	T C		TRUE
138	179	0	0	1	2	G T	A G	T C	T C	T C		TRUE
139	180	0	0	1	2	G G	A A	C C	N N	N N		TRUE
140	181	0	0	1	2	G G	A A	T T	T T	T T		TRUE
141	182	0	0	1	2	G G	A A	C C	N N	N N		TRUE
142	183	0	0	1	2	G G	A A	T T	T T	T T		TRUE
143	184	0	0	1	2	G G	A A	T T	T T	T T		TRUE
144	185	0	0	1	2	G G	A A	T T	T T	T T		TRUE
145	186	0	0	1	2	G G	A A	T T	T T	T T		TRUE
146	187	0	0	1	2	G T	A G	T C	T C	T C		TRUE
147	189	0	0	1	2	G T	G G	C C	T C	T C		TRUE
148	192	0	0	1	2	N N	A G	T C	T C	T C		TRUE
149	193	0	0	1	2	G G	A A	T T	T T	T T		TRUE
150	194	0	0	1	2	N N	N N	N N	T C	T C		TRUE
151	196	0	0	1	2	G T	G G	C C	C C	C C		TRUE
152	198	0	0	1	2	G G	A G	T C	T C	T C		TRUE
153	199	0	0	1	2	G G	A A	T T	T T	T T		TRUE
154	201	0	0	1	2	G T	A G	T C	T C	T C		TRUE
155	202	0	0	1	2	G G	A A	T T	T T	T T		TRUE
156	203	0	0	1	2	N N	A A	T T	T C	T C		TRUE
157	204	0	0	1	2	N N	A A	N N	T C	T C		TRUE
158	205	0	0	1	2	N N	N N	N N	T T	T T		TRUE
159	208	0	0	1	2	G G	G G	N N	T C	C C	T C	FALSE	New	A peak seen too low, not sure is noice or signal, may be delete or redo
160	209	0	0	1	2	G G	A A	T C	T T	T T		TRUE
161	210	0	0	1	2	G G	A A	T T	T C	T C		TRUE
162	211	0	0	1	2	G G	A G	T C	T T	T T		TRUE
163	212	0	0	1	2	G G	A A	T T	T T	T T		TRUE
164	214	0	0	1	2	N N	N N	N N	T C	T C		TRUE
165	215	0	0	1	2	N N	N N	N N	T C	T C		TRUE
166	216	0	0	1	2	N N	N N	N N	N N	N N		TRUE
167	217	0	0	1	2	N N	N N	N N	N N	T T	N N	FALSE	Old	poor sample quility, may be delete or redo
168	218	0	0	1	2	G G	A A	T T	T T	T T		TRUE
169	219	0	0	1	2	G T	G G	C C	T C	T C		TRUE
170	220	0	0	1	2	G G	A G	T C	C C	C C		TRUE
171	221	0	0	1	2	G G	A A	C C	T T	C C	T T	FALSE	Old	you are right
172	224	0	0	1	2	N N	N N	N N	T T	T T		TRUE
173	225	0	0	1	2	N N	N N	N N	T T	T T		TRUE
174	226	0	0	1	2	G G	A A	T T	T T	T T		TRUE
175	227	0	0	1	2	G G	A A	T C	T T	T T		TRUE
176	228	0	0	1	2	G G	A A	T T	N N	N N		TRUE
177	229	0	0	1	2	G G	G G	C C	C C	C C		TRUE
178	230	0	0	1	2	G G	A G	T C	T T	T T		TRUE
179	233	0	0	1	2	N N	A G	N N	T C	T C		TRUE
180	234	0	0	1	2	N N	A A	N N	T T	T T		TRUE
181	235	0	0	1	2	N N	A G	T C	T C	T C		TRUE
182	236	0	0	1	2	G G	A A	T T	T T	T T		TRUE
183	237	0	0	1	2	G G	A A	T T	N N	T T	N N	FALSE	Old	in old dataset, not record last time
184	239	0	0	1	2	G G	A A	T C	T T	T T		TRUE
185	240	0	0	1	2	G G	A A	T T	T T	T T		TRUE
186	241	0	0	1	2	G G	A A	T T	T T	T T		TRUE
187	242	0	0	1	2	N N	N N	N N	T T	T T		TRUE
188	243	0	0	1	2	G G	A A	T T	T T	T T		TRUE
189	244	0	0	1	2	G G	A A	T C	T T	T T		TRUE
190	245	0	0	1	2	G G	A G	T C	T T	T T		TRUE
192	248	0	0	1	2	G G	A A	T T	T T	T T		TRUE
193	249	0	0	1	2	G G	A G	T C	T T	T T		TRUE
194	250	0	0	1	2	G T	A G	T C	T C	T C		TRUE
195	251	0	0	1	2	G G	A A	T T	T T	T T		TRUE
196	252	0	0	1	2	G T	G G	C C	T C	T C		TRUE
197	253	0	0	1	2	G G	A A	T T	T T	T T		TRUE
198	254	0	0	1	2	G T	A G	T C	T C	T C		TRUE
199	255	0	0	1	2	G T	A G	T C	T C	T C		TRUE
200	256	0	0	1	2	G G	A A	T C	T T	T T		TRUE
201	258	0	0	1	2	G G	A A	T T	T T	T T		TRUE
202	259	0	0	1	2	G G	A A	T T	T T	T T		TRUE
203	260	0	0	1	2	G T	G G	C C	C C	C C		TRUE
204	261	0	0	1	2	G G	A A	T C	T T	T T		TRUE
205	262	0	0	1	2	G G	A A	T T	T T	T T		TRUE
206	264	0	0	1	2	G G	A A	T T	T T	T T		TRUE
207	266	0	0	1	2	G G	A A	T C	T T	T T		TRUE
208	267	0	0	1	2	G G	A A	T C	T T	T T		TRUE
209	268	0	0	1	2	G G	A A	T T	T T	T T		TRUE
210	270	0	0	1	2	G T	A G	T C	T C	T C		TRUE
211	271	0	0	1	2	G T	A G	T C	T C	T C		TRUE
212	272	0	0	1	2	G G	A A	T T	T T	T T		TRUE
213	273	0	0	1	2	G G	A A	T T	T T	T T		TRUE
214	274	0	0	1	2	G G	A A	T T	T T	T T		TRUE
215	275	0	0	1	2	G G	A A	T T	T T	T T		TRUE
216	276	0	0	1	2	T T	G G	C C	C C	C C		TRUE
217	277	0	0	1	2	G T	A G	T C	T C	T C		TRUE
218	281	0	0	1	2	G G	A A	T T	T T	T T		TRUE
219	282	0	0	1	2	G G	A A	T T	T T	T T		TRUE
220	283	0	0	1	2	G G	A A	T T	T T	T T		TRUE
221	284	0	0	1	2	G G	A A	T T	T C	T C		TRUE
222	286	0	0	1	2	G G	A A	T T	T T	T T		TRUE
223	287	0	0	1	2	G G	A A	T C	T T	T T		TRUE
224	288	0	0	1	2	G G	A A	T T	T T	T T		TRUE
225	290	0	0	1	2	G G	A A	T T	T T	T T		TRUE
226	291	0	0	1	2	G G	A G	T C	T T	T T		TRUE
227	293	0	0	1	2	G G	A G	T C	T T	T T		TRUE
228	294	0	0	1	2	G T	A G	T C	T C	T C		TRUE
229	295	0	0	1	2	G G	A G	C C	T T	T T		TRUE
230	296	0	0	1	2	G G	A A	T T	T T	T T		TRUE
231	297	0	0	1	2	G G	A G	T C	T T	T T		TRUE
232	298	0	0	0	2	G T	G G	C C	T C	T C		TRUE
233	299	0	0	1	2	G G	A G	T C	T T	T T		TRUE
234	302	0	0	1	2	G G	A A	T C	T T	T T		TRUE
235	305	0	0	1	2	G G	A A	T T	T T	T T		TRUE
236	307	0	0	1	2	G G	A A	T T	T T	T T		TRUE
237	308	0	0	1	2	G T	A G	T C	T C	T C		TRUE
238	309	0	0	1	2	G G	A A	T C	T T	T T		TRUE
239	310	0	0	1	2	N N	G G	C C	T C	N N	T C	FALSE	Old	you are right
240	311	0	0	1	2	G T	A G	T C	T C	T C		TRUE
241	312	0	0	1	2	G G	A A	T T	T T	T T		TRUE
242	314	0	0	1	2	G G	A A	T T	T T	T T		TRUE
243	317	0	0	1	2	G G	A A	T T	T T	T T		TRUE
244	318	0	0	1	2	G G	A G	T C	T T	T T		TRUE
245	319	0	0	1	2	G G	A A	T T	T T	T T		TRUE
246	320	0	0	1	2	G T	A G	T C	T C	T C		TRUE
247	322	0	0	1	2	G G	A A	T T	T T	T T		TRUE
248	323	0	0	1	2	G G	A A	C C	T T	T T		TRUE
249	324	0	0	1	2	T T	G G	C C	C C	C C		TRUE
250	325	0	0	1	2	G G	A A	T C	T T	T T		TRUE
251	326	0	0	1	2	G G	A A	T T	T T	T T		TRUE
252	327	0	0	1	2	G G	A A	T C	T T	T T		TRUE
253	328	0	0	1	2	G G	A G	T C	T C	T C	T C	FALSE	New	Seem no problem for the data
254	329	0	0	1	2	G G	A A	T C	T T	T T		TRUE
255	330	0	0	1	2	G T	A G	T C	T C	T C		TRUE
256	332	0	0	1	2	G T	A G	T C	N N	N N		TRUE
257	335	0	0	1	2	G G	A A	T T	T T	T T		TRUE
258	336	0	0	1	2	G G	A G	C C	T C	T C		TRUE
259	337	0	0	1	2	G G	A A	T C	T T	T T		TRUE
260	338	0	0	1	2	G G	A G	T C	T C	T C		TRUE
261	339	0	0	1	2	G T	A G	T C	T C	T C		TRUE
262	340	0	0	1	2	G G	A A	T T	T T	T T		TRUE
263	342	0	0	1	2	G G	A A	T T	T T	T T		TRUE
264	343	0	0	1	2	G G	A A	T T	T T	T T		TRUE
265	344	0	0	1	2	G G	A G	T T	T C	T C		TRUE
266	345	0	0	1	2	G G	A G	T C	T C	T C		TRUE
267	346	0	0	1	2	G G	A G	T C	T T	T T		TRUE
268	348	0	0	1	2	G G	A A	T T	T T	T T		TRUE
269	349	0	0	1	2	G G	A A	T C	T T	T T		TRUE
270	350	0	0	1	2	G G	A G	T C	T C	T C		TRUE
271	351	0	0	1	2	G G	A A	T T	T T	T T		TRUE
272	352	0	0	1	2	G G	A A	T T	T T	T T		TRUE
273	353	0	0	1	2	N N	N N	N N	T C	T C		TRUE
274	354	0	0	1	2	G T	A G	C C	T C	T C		TRUE
275	363	0	0	1	2	G T	A G	T C	T C	T C		TRUE
276	356	0	0	1	2	G G	A G	T C	T T	T T		TRUE
277	357	0	0	1	2	G G	A A	T C	T C	T C		TRUE
278	358	0	0	1	2	G G	A A	T T	T C	T C		TRUE
279	359	0	0	1	2	G T	A G	T C	T C	T C		TRUE
280	360	0	0	1	2	G G	A A	T C	C C	C C		TRUE
281	361	0	0	1	2	G G	A A	T T	T T	T T		TRUE
282	362	0	0	1	2	G G	A G	T C	T T	T T		TRUE
284	365	0	0	1	2	G G	A A	T T	C C	T C	C C	FALSE	Old	nucleotide no. 28 is AG
285	366	0	0	1	2	G G	A A	T T	T T	T T		TRUE
286	367	0	0	1	2	G G	A A	T T	T T	T T		TRUE
287	368	0	0	1	2	G T	A G	T C	T T	T T		TRUE
288	369	0	0	1	2	G T	A G	T C	T T	T T		TRUE
289	371	0	0	1	2	G T	A G	T C	T T	T T		TRUE
290	373	0	0	1	2	G T	A G	T C	T T	T T		TRUE
291	374	0	0	1	2	G G	A G	T C	C C	C C		TRUE
292	376	0	0	0	2	N N	N N	N N	T T	T T		TRUE
293	377	0	0	1	2	G T	A G	T C	T T	T T		TRUE
294	378	0	0	1	2	G G	A G	T C	T T	T T		TRUE
295	379	0	0	1	2	G G	A A	T C	T T	T T		TRUE
296	380	0	0	1	2	G T	A G	T C	T T	T T		TRUE
297	382	0	0	1	2	G G	A A	T C	T T	T T		TRUE
298	383	0	0	1	2	G G	A A	T T	T T	T T		TRUE
299	384	0	0	1	2	G G	A A	T C	T T	T T		TRUE
300	385	0	0	1	2	G T	A G	T C	T T	T T		TRUE
301	386	0	0	1	2	G G	A A	C C	T T	T T		TRUE
302	387	0	0	1	2	G G	A A	T T	T T	T T		TRUE
303	388	0	0	1	2	G G	A A	T T	T C	T C		TRUE
304	390	0	0	1	2	G G	A G	T C	T C	T C		TRUE
305	391	0	0	1	2	G G	A A	T T	T T	T T		TRUE
306	393	0	0	1	2	G T	A G	T C	T T	T T		TRUE
307	394	0	0	1	2	G G	A A	T C	T T	T T		TRUE
308	395	0	0	1	2	G G	A A	T T	N N	N N		TRUE
309	397	0	0	1	2	G G	A G	T C	T T	T T		TRUE
310	398	0	0	1	2	G G	A A	T T	T C	T C		TRUE
311	399	0	0	1	2	G G	A G	T C	T T	T T		TRUE
312	400	0	0	1	2	G G	A A	T T	T T	T T		TRUE
313	402	0	0	1	2	G T	G G	C C	T T	T T		TRUE
314	405	0	0	1	2	G T	A G	C C	T T	T T		TRUE
315	406	0	0	1	2	G G	A G	T C	T C	T C		TRUE
316	407	0	0	1	2	N N	N N	N N	T T	T T		TRUE
317	408	0	0	1	2	G G	A G	T C	T T	T T		TRUE
318	409	0	0	1	2	N N	N N	N N	T T	T T		TRUE
319	411	0	0	1	2	G T	A G	T C	T C	T C		TRUE
320	412	0	0	1	2	G G	A G	T C	T T	T T		TRUE
321	414	0	0	1	2	G G	A G	T C	N N	N N		TRUE
322	417	0	0	1	2	G G	A A	T T	T T	T T		TRUE
323	420	0	0	1	2	G G	A G	T C	T T	T T		TRUE
324	421	0	0	1	2	G G	A A	C C	T C	T C		TRUE
325	422	0	0	1	2	G T	A G	T C	T T	T C	T T	FALSE	Old	you are right
326	424	0	0	1	2	G G	A G	T C	T T	T T		TRUE
327	425	0	0	1	2	G T	A G	T C	T T	T T		TRUE
328	426	0	0	1	2	G G	A A	T T	T T	T T		TRUE
329	427	0	0	1	2	G T	A G	C C	T T	T T		TRUE
330	428	0	0	1	2	G G	A G	T C	T C	T C		TRUE
331	429	0	0	1	2	N N	N N	N N	T T	T T		TRUE
332	430	0	0	1	2	G G	A A	T C	T T	T T		TRUE
333	431	0	0	1	2	G T	G G	C C	T C	T C		TRUE
334	432	0	0	1	2	G G	A A	T T	T C	T C		TRUE
335	433	0	0	1	2	G T	A G	T C	T T	T T		TRUE
336	434	0	0	1	2	G T	A G	T C	T T	T T		TRUE
337	435	0	0	1	2	G T	A G	T C	T T	T T		TRUE
338	438	0	0	1	2	G G	A A	T T	T T	T T		TRUE
339	439	0	0	1	2	N N	N N	N N	T C	T C		TRUE
340	440	0	0	1	2	G G	A G	T C	T T	T T		TRUE
341	441	0	0	1	2	G T	A G	T C	T C	T C		TRUE
342	442	0	0	1	2	G G	A A	T T	T T	T T		TRUE
343	443	0	0	1	2	T T	G G	C C	T T	T T		TRUE
344	444	0	0	1	2	T T	G G	C C	T T	T T		TRUE
345	445	0	0	1	2	G G	A A	T T	T C	T C		TRUE
346	446	0	0	1	2	G G	A A	T T	T T	T T		TRUE
347	447	0	0	1	2	G G	A A	T T	T T	T T		TRUE
348	448	0	0	1	2	G G	A A	T T	N N	N N		TRUE
349	449	0	0	1	2	G G	G G	C C	T T	T T		TRUE
350	450	0	0	1	2	G G	A G	T C	T C	T C		TRUE
351	452	0	0	1	2	G G	A A	C C	N N	N N		TRUE
352	453	0	0	1	2	G T	A G	C C	T C	T C		TRUE
353	455	0	0	1	2	G G	A A	T T	T T	T T		TRUE
354	456	0	0	0	2	G T	G G	C C	N N	N N		TRUE
355	457	0	0	1	2	G G	A A	T T	T C	T C		TRUE
356	459	0	0	1	2	G T	G G	C C	T T	T T		TRUE
357	460	0	0	1	2	G G	A A	T C	T C	T C		TRUE
358	461	0	0	1	2	G G	A A	T T	T T	T T		TRUE
359	462	0	0	1	2	G G	A A	T T	T C	T C		TRUE
360	463	0	0	1	2	G T	A G	T C	T T	T T		TRUE
361	464	0	0	1	2	G G	A G	T C	T T	T T		TRUE
362	466	0	0	1	2	G G	A A	T C	T C	T C		TRUE
363	470	0	0	1	2	G T	A G	T C	T C	T C		TRUE
364	471	0	0	1	2	G G	A A	T T	T T	T T		TRUE
365	472	0	0	1	2	G T	N N	C C	T C	T C		TRUE
366	475	0	0	1	2	G G	N N	C C	T C	T C		TRUE
367	476	0	0	1	2	G G	A A	T T	T C	T C		TRUE
368	45	0	0	1	2	G T	G G	C C	C C	C C		TRUE
369	119	0	0	1	2	G G	A A	C C	N N	N N		TRUE
370	121	0	0	1	2	N N	A A	T C	T T	T T		TRUE
371	171	0	0	1	2	G T	A G	T C	T C	T C		TRUE
372	174	0	0	1	2	N N	N N	N N	T T	T T		TRUE
373	178	0	0	1	2	G G	A A	T T	T C	T C		TRUE
374	195	0	0	1	2	G G	A A	T T	T C	T C		TRUE
375	197	0	0	1	2	G G	A A	T T	T T	T T		TRUE
376	200	0	0	1	2	G G	A G	T C	T T	T T		TRUE
380	403	0	0	1	2	N N	A A	T T	T C	T C		TRUE
381	436	0	0	1	2	N N	N N	N N	T T	T T		TRUE
382	458	0	0	1	2	N N	N N	N N	C C	C C		TRUE
383	478	0	0	1	2	G G	A A	T T	T T	T T		TRUE
384	480	0	0	1	2	G T	A G	T C	T T	T T		TRUE
385	482	0	0	1	2	G T	A A	T C	T T	T T		TRUE
386	483	0	0	1	2	G G	A G	T C	T C	T C		TRUE
387	484	0	0	1	2	G G	A A	T T	T T	T T		TRUE
388	485	0	0	1	2	G T	A A	C C	T T	T T		TRUE
389	486	0	0	0	2	N N	A A	N N	N N	T T	N N	FALSE	Old	nucleotide no. 20 is A(no G signal)
390	487	0	0	1	2	G T	A G	T C	T C	T C		TRUE
391	489	0	0	1	2	G G	A A	T C	T T	T T		TRUE
392	495	0	0	1	2	G G	A A	T C	T T	T T		TRUE
393	496	0	0	1	2	G G	A A	T C	T T	T T		TRUE
394	499	0	0	1	2	G G	A A	T T	T C	T C		TRUE
395	500	0	0	1	2	G G	A A	T T	T T	T T		TRUE
396	501	0	0	1	2	G G	A A	T T	T C	T C		TRUE
397	502	0	0	1	2	G G	A A	T T	T C	T C		TRUE
398	503	0	0	1	2	G T	A A	T T	T C	T C		TRUE
399	504	0	0	1	2	G G	A G	T C	T T	T T		TRUE
400	505	0	0	1	2	G G	A G	T C	T C	T C		TRUE
401	506	0	0	1	2	N N	A A	T T	N N	T T	N N	FALSE	Old	In old dataset
402	510	0	0	1	2	N N	N N	N N	T T	T T		TRUE
403	511	0	0	1	2	N N	A G	T C	T C	T C		TRUE
404	512	0	0	1	2	N N	N N	N N	T C	T C		TRUE
405	513	0	0	1	2	N N	N N	N N	T T	T T		TRUE
406	515	0	0	1	2	G G	A A	T T	T T	T T		TRUE
407	516	0	0	1	2	G T	A G	T C	T C	T C		TRUE
408	517	0	0	1	2	G G	A A	T C	T T	T T		TRUE
409	518	0	0	0	2	N N	N N	N N	T T	T T		TRUE
410	519	0	0	1	2	N N	N N	N N	T T	T T		TRUE
411	520	0	0	1	2	G G	A A	T T	T C	T C		TRUE
412	521	0	0	1	2	G T	A G	T C	T T	T T		TRUE
413	522	0	0	1	2	N N	N N	N N	T C	T C		TRUE
414	524	0	0	1	2	N N	N N	N N	T T	T T		TRUE
415	525	0	0	1	2	N N	A G	T C	T T	T T		TRUE
416	526	0	0	1	2	N N	N N	N N	T C	T C		TRUE
417	527	0	0	1	2	N N	N N	N N	T T	T T		TRUE
418	528	0	0	1	2	N N	N N	N N	T C	T C		TRUE
419	530	0	0	1	2	G G	A G	T C	T T	T T		TRUE
420	535	0	0	1	2	G T	A G	T C	T T	T T		TRUE
421	537	0	0	1	2	G G	A A	T T	T T	T T		TRUE
422	538	0	0	1	2	G T	A G	T C	T C	T C		TRUE
423	539	0	0	1	2	N N	A A	T C	T T	T T		TRUE
424	540	0	0	1	2	N N	A A	T T	T C	T C		TRUE
425	542	0	0	1	2	N N	N N	N N	T T	T T		TRUE
426	543	0	0	1	2	N N	N N	N N	T C	T C		TRUE
427	544	0	0	1	2	G G	A A	T T	T T	T T		TRUE
428	545	0	0	1	2	G G	A G	T C	C C	C C		TRUE
429	546	0	0	1	2	G T	A G	T C	T T	T T		TRUE
430	548	0	0	1	2	G G	A A	T C	T T	T T		TRUE
431	549	0	0	1	2	G T	A A	T C	T C	T C		TRUE
432	550	0	0	1	2	G T	A A	T T	T C	T C		TRUE
433	551	0	0	1	2	N N	N N	N N	T T	T T		TRUE
434	552	0	0	1	2	G G	A A	T T	T C	T C		TRUE
435	553	0	0	1	2	G G	A A	T T	T T	T T		TRUE
436	555	0	0	1	2	G G	A A	T T	T T	T T		TRUE
437	B1	0	0	2	2	G G	A G	T C	T T	T T		TRUE
438	B10	0	0	2	2	N N	N N	N N	T T	T T		TRUE
439	B11	0	0	2	2	T T	G G	C C	C C	C C		TRUE
440	B12	0	0	2	2	N N	A G	T C	T T	T T		TRUE
441	B13	0	0	2	2	N N	A A	T C	T T	T T		TRUE
442	B14	0	0	2	2	N N	N N	N N	T T	T T		TRUE
443	B15	0	0	2	2	G G	A A	T T	T C	T C		TRUE
444	B17	0	0	2	2	N N	N N	N N	T T	T T		TRUE
445	B2	0	0	2	2	N N	A A	T T	T T	T T		TRUE
446	B21	0	0	2	2	N N	N N	N N	T C	T C		TRUE
447	B22	0	0	2	2	N N	A A	T T	T T	T T		TRUE
448	B23	0	0	2	2	N N	A A	T T	T C	T C		TRUE
449	B24	0	0	2	2	N N	N N	N N	T T	T T		TRUE
450	B3	0	0	2	2	T T	G G	C C	T C	T C		TRUE
451	B4	0	0	2	2	G T	A G	C C	T C	T C		TRUE
452	B5	0	0	2	2	N N	N N	N N	T C	T C		TRUE
453	B6	0	0	2	2	N N	A G	N N	T T	T T		TRUE
454	B7	0	0	2	2	G T	A G	T C	T C	T C		TRUE
455	B8	0	0	2	2	G G	A A	T T	T T	T T	T T	FALSE	New	nucleotide No 47 is A
456	B9	0	0	2	2	G T	A A	T T	C C	C C		TRUE
457	B100	0	0	2	2	N N	A A	C C	T T	T T		TRUE
458	B101	0	0	2	2	G G	N N	N N	T T	T T		TRUE
459	B102	0	0	2	2	G G	A A	N N	T T	T T		TRUE
460	B103	0	0	2	2	G G	A G	N N	T C	T C		TRUE
461	B105	0	0	2	2	G G	A A	N N	T T	T T		TRUE
462	B106	0	0	2	2	N N	N N	N N	T T	T T		TRUE
463	B107	0	0	2	2	G G	A A	T C	T T	T T		TRUE
464	B108	0	0	2	2	G G	A G	T C	T T	T T		TRUE
465	B109	0	0	2	2	N N	A A	T T	T T	T T		TRUE
466	B110	0	0	2	2	T T	G G	C C	C C	C C		TRUE
467	B111	0	0	2	2	G G	A G	N N	T T	T T		TRUE
468	B113	0	0	2	2	G G	A G	T C	T C	T C		TRUE
469	B114	0	0	2	2	G G	A G	T C	T T	T T		TRUE
470	B115	0	0	2	2	G T	A G	T C	T C	T C		TRUE
471	B117	0	0	2	2	N N	G G	N N	T T	T T		TRUE
472	B118	0	0	2	2	G G	A A	T T	T T	T T		TRUE
473	B119	0	0	2	2	N N	N N	N N	T C	T C		TRUE
474	B120	0	0	2	2	T T	G G	C C	C C	C C		TRUE
475	B121	0	0	2	2	G T	A G	T C	T C	T C		TRUE
476	B122	0	0	2	2	G G	A A	T C	T T	T T		TRUE
477	B123	0	0	2	2	G G	G G	C C	T C	T C		TRUE
478	B124	0	0	2	2	N N	N N	N N	T T	T T		TRUE
479	B125	0	0	2	2	N N	N N	N N	T C	T C		TRUE
480	B126	0	0	2	2	G G	A A	T T	N N	N N		TRUE
481	B127	0	0	2	2	N N	A G	T T	T T	T T		TRUE
482	B128	0	0	2	2	N N	A A	T T	T T	T T		TRUE
483	B129	0	0	2	2	G T	A G	T C	N N	N N		TRUE
484	B130	0	0	2	2	G G	A G	T C	T C	T C		TRUE
485	B131	0	0	2	2	G G	A G	T C	N N	T C		FALSE	Old	Sample label (B)131 may not be the sample B131, may be delete this result
486	B27	0	0	2	2	N N	N N	N N	T T	T T		TRUE
487	B28	0	0	2	2	N N	A A	T T	N N	T T	N N	FALSE	New	Nucleotide No 16 is A
488	B29	0	0	2	2	G G	A A	T T	T T	T T		TRUE
489	B30	0	0	2	2	G G	A A	C C	T T	T T		TRUE
490	B31	0	0	2	2	G G	A A	T T	T T	T T		TRUE
491	B32	0	0	2	2	G T	A G	T C	C C	N N	C C	FALSE	Old	you are right
492	B35	0	0	2	2	N N	N N	N N	T T	T T		TRUE
493	B36	0	0	2	2	N N	N N	N N	T T	T T		TRUE
494	B37	0	0	2	2	G G	A G	T C	T C	T C		TRUE
495	B38	0	0	2	2	G G	G G	C C	T C	T C		TRUE
496	B39	0	0	2	2	N N	N N	N N	T T	T T		TRUE
497	B41	0	0	2	2	G G	A G	T C	T T	T T		TRUE
498	B42	0	0	2	2	G G	A A	T T	T T	N N	T T	FALSE	New	you are right
499	B43	0	0	2	2	G G	A G	T C	T C	T C		TRUE
500	B44	0	0	2	2	G G	A A	T T	T T	T T		TRUE
501	B46	0	0	2	2	N N	N N	N N	N N	T C		FALSE	Old	sample label wrong, it should be B45
502	B47	0	0	2	2	N N	N N	N N	T T	T T		TRUE
503	B49	0	0	2	2	G T	A G	T C	T C	T C		TRUE
504	B51	0	0	2	2	G G	A G	T C	N N	N N		TRUE
505	B52	0	0	2	2	G G	A A	T T	T T	T T		TRUE
506	B53	0	0	2	2	G G	A A	T C	T T	N N	T T	FALSE	Old	you are right
507	B55	0	0	2	2	G T	A G	T C	T C	T C		TRUE
508	B56	0	0	2	2	G G	A A	T C	T T	T T		TRUE
509	B57	0	0	2	2	N N	N N	N N	T C	T C		TRUE
510	B58	0	0	2	2	G G	A G	T C	T T	T T		TRUE
511	B59	0	0	2	2	G G	A A	T T	T T	T T		TRUE
512	B60	0	0	2	2	G T	A G	T C	T C	T C		TRUE
513	B61	0	0	2	2	G G	A G	T C	T C	T C		TRUE
514	B63	0	0	2	2	G G	A A	T C	T T	N N	T T	FALSE	Old	you are right
515	B64	0	0	2	2	G G	A G	T C	T T	T T		TRUE
516	B65	0	0	2	2	G G	A A	T T	T T	T T		TRUE
517	B66	0	0	2	2	G T	A G	T C	T C	T C		TRUE
518	B67	0	0	2	2	N N	N N	N N	T T	T T		TRUE
519	B68	0	0	2	2	T T	G G	C C	T T	T T		TRUE
520	B69	0	0	2	2	G T	A G	T C	T C	T C		TRUE
521	B70	0	0	2	2	G G	A A	T T	T T	T T		TRUE
522	B71	0	0	2	2	N N	A G	T C	N N	N N	N N	FALSE	Old	cannot read
523	B74	0	0	2	2	G G	A A	T C	N N	N N		TRUE
524	B75	0	0	2	2	G G	A A	T T	T T	T T		TRUE
525	B76	0	0	2	2	G G	A G	T C	T C	T C		TRUE
526	B77	0	0	2	2	N N	A G	T C	T C	T C		TRUE
527	B78	0	0	2	2	G G	A A	T T	T T	T T		TRUE
528	B79	0	0	2	2	G G	A G	T C	T T	T T		TRUE
529	B81	0	0	2	2	N N	A G	T C	T C	T C		TRUE
530	B82	0	0	2	2	G G	A A	T C	T T	T T		TRUE
531	B83	0	0	2	2	G G	A A	T C	T T	T T		TRUE
532	B84	0	0	2	2	G G	A A	T T	T T	T T		TRUE
533	B85	0	0	2	2	G G	A A	T T	T T	T T		TRUE
534	B86	0	0	2	2	G G	A A	T T	T T	T T		TRUE
535	B87	0	0	2	2	T T	G G	C C	C C	C C		TRUE
536	B88	0	0	2	2	G G	A G	T C	T T	T T		TRUE
537	B89	0	0	2	2	G G	A G	T C	T T	T T		TRUE
538	B91	0	0	2	2	G G	A A	T C	T T	T C	T T	FALSE	New	you are right
539	B93	0	0	2	2	G G	A G	T C	T T	T T		TRUE
540	B94	0	0	2	2	N N	N N	N N	T T	T T		TRUE
541	B95	0	0	2	2	G G	A G	T C	T C	T C		TRUE
542	B96	0	0	2	2	N N	N N	N N	T T	T T		TRUE
543	B98	0	0	2	2	G G	A A	T T	T T	T T		TRUE
544	B99	0	0	2	2	G T	G G	C C	C C	C C		TRUE
545	B132	0	0	2	2	N N	A G	T C	T T	T T		TRUE
546	B133	0	0	2	2	G T	A G	T C	T C	T C		TRUE
547	B134	0	0	2	2	G G	G G	C C	C C	C C		TRUE
548	B135	0	0	2	2	G G	A G	C C	C C	C C		TRUE
549	B136	0	0	2	2	G G	G G	T C	T T	T T		TRUE
550	B137	0	0	2	2	G G	A A	T T	T T	T T	T T	FALSE	New	nucelotide no 49 is A
551	B138	0	0	2	2	N N	A G	T C	N N	N N	N N	FALSE	Old	poor signal, redo or delete it
552	B139	0	0	2	2	N N	A G	C C	T C	T C		TRUE
553	B140	0	0	2	2	G G	A A	T T	T T	T T		TRUE
554	B141	0	0	2	2	G T	A G	T C	T C	T C	T C	FALSE	New	nuclotide 48 is AG
555	B142	0	0	2	2	G G	A A	T T	T T	T T		TRUE
556	B143	0	0	2	2	G G	A A	C C	T T	T T		TRUE
557	B144	0	0	2	2	G G	A A	T T	T T	T T		TRUE
558	B145	0	0	2	2	G G	A G	T C	T C	T C		TRUE
559	B146	0	0	2	2	G T	A G	T C	N N	N N		TRUE
560	B147	0	0	2	2	N N	A A	T T	T T	T T		TRUE
561	B148	0	0	2	2	G T	A G	T C	C C	C C		TRUE
562	B149	0	0	2	2	G G	A G	T C	N N	N N		TRUE
563	B150	0	0	2	2	N N	A G	N N	T C	T C	T C	FALSE	New	nucelotide no 48 is A
564	B151	0	0	2	2	G G	A G	T C	T C	T C		TRUE
565	B152	0	0	2	2	G G	A A	N N	T T	T T	T T	FALSE	New	nucleotide no 53 is A
566	B154	0	0	2	2	G T	A G	T C	T C	T C	T C	FALSE	New	nuclotide 47 is AG
567	B155	0	0	2	2	G G	A A	T T	T T	T T		TRUE
568	B156	0	0	2	2	G G	A G	C C	T T	C C	T T	FALSE	Old	you are right
569	B157	0	0	2	2	G T	G G	C C	C C	C C		TRUE
570	B158	0	0	2	2	N N	N N	N N	T T	T T		TRUE
571	B159	0	0	2	2	G G	A G	T C	T C	T C		TRUE
572	B160	0	0	2	2	G G	A A	T T	T T	T T		TRUE
573	B161	0	0	2	2	G T	A G	T C	T C	T C	T C	FALSE	New	nucleotide 46 is AG
574	B162	0	0	2	2	G G	A A	T T	T T	T T		TRUE
575	B163	0	0	2	2	G G	A A	T T	C C	C C		TRUE
576	B164	0	0	2	2	N N	G G	N N	T C	T C		TRUE
577	B165	0	0	2	2	T T	A G	T C	C C	C C		TRUE
578	B166	0	0	2	2	G G	A A	T C	N N	N N		TRUE
579	B167	0	0	2	2	G G	A A	T T	T T	T T	T T	FALSE	New	nucleotide no. 47 is A
580	B168	0	0	2	2	N N	N N	N N	T C	T C	T C	FALSE	New	nuclotide no 48 is AG
581	B169	0	0	2	2	G G	A A	T C	N N	N N		TRUE
582	B170	0	0	2	2	G T	A G	T C	N N	T C	C C	FALSE	Old	poor signal, redo or delete it
583	B171	0	0	2	2	G G	A A	T T	T T	T T		TRUE
584	B172	0	0	2	2	G T	A G	T C	T C	T C		TRUE
585	B173	0	0	0	2	G G	G G	C C	N N	N N		TRUE
586	B174	0	0	2	2	G T	A G	C C	T C	T C		TRUE
587	B176	0	0	2	2	G G	A G	T C	T T	T T		TRUE
588	B177	0	0	2	2	G G	A A	T C	T T	T T	T T	FALSE	New	nuclotide no 50 is AG
589	B178	0	0	2	2	G G	A A	T T	T C	T C	T C	FALSE	New	nuclotide no 48 is AG
590	B179	0	0	2	2	G T	A G	C C	T C	T C		TRUE
591	B180	0	0	2	2	G G	A G	T C	T T	T T		TRUE
592	B181	0	0	2	2	G T	A G	T C	C C	C C		TRUE
593	B182	0	0	2	2	G T	A G	T C	T C	T C		TRUE
594	B183	0	0	2	2	G G	A A	T T	T T	T T		TRUE
595	B184	0	0	2	2	G G	G G	C C	T T	T T		TRUE
596	B185	0	0	2	2	G G	A A	T C	N N	N N		TRUE
597	B186	0	0	2	2	G G	A G	T C	T T	T T		TRUE
598	B187	0	0	2	2	G G	A A	T T	T T	T T		TRUE
599	B188	0	0	2	2	G G	A A	T T	T T	T T		TRUE
600	B189	0	0	2	2	G G	A A	T T	T T	T T		TRUE
601	B190	0	0	2	2	G G	A G	T C	T T	T T		TRUE
602	B191	0	0	2	2	G G	A A	T T	T T	T T		TRUE
603	B192	0	0	2	2	G G	A A	N N	T T	T T		TRUE
604	B193	0	0	2	2	T T	A G	C C	N N	N N	N N	FALSE	Old	poor signal, redo or delete it
605	B194	0	0	2	2	G G	A A	T T	T T	T T		TRUE
606	B196	0	0	2	2	G G	A A	T T	T T	T T		TRUE
607	B197	0	0	2	2	G G	A A	T T	T T	T T		TRUE
608	B198	0	0	2	2	G G	A A	T C	T T	T T		TRUE
609	B199	0	0	2	2	N N	N N	N N	T T	T T		TRUE
610	B200	0	0	2	2	G G	A A	T C	T T	T T		TRUE
611	B201	0	0	2	2	G G	A A	T C	T T	T T		TRUE
612	B202	0	0	2	2	G G	A A	T C	T T	T T		TRUE
613	B203	0	0	2	2	G G	A G	T T	T C	T C	T C	FALSE	New	nucleotide 46 is AG
614	B205	0	0	2	2	G G	A A	T T	T T	T T		TRUE
615	B206	0	0	2	2	G G	A A	T T	T T	T T	T T	FALSE	New	nucleotide 47 is A
616	B207	0	0	2	2	G G	A A	T T	T C	T C	T C	FALSE	New	nucleotide 48 is AG
617	B208	0	0	2	2	G G	A G	N N	T T	T T		TRUE
618	B209	0	0	2	2	G T	A A	N N	T C	T C		TRUE
619	B210	0	0	2	2	G G	A A	T T	T T	T T		TRUE
620	B211	0	0	2	2	G G	A G	C C	T T	T T		TRUE
621	B212	0	0	2	2	G T	A G	T C	T C	T C	T C	FALSE	New	nucloetide no 48 is AG
622	B213	0	0	2	2	G G	A A	T C	C C	C C		TRUE
623	B214	0	0	2	2	G T	A G	C C	N N	N N		TRUE
624	B215	0	0	2	2	G G	A A	T C	N N	N N	N N	FALSE	Old	poor signal, redo or delete it
625	B216	0	0	2	2	G G	A A	T T	T T	T T		TRUE
626	B217	0	0	2	2	G T	A G	T C	T C	T C		TRUE
627	B218	0	0	2	2	G G	A G	T C	C C	N N	C C	FALSE	Old	you are right
628	B219	0	0	2	2	G G	A A	T T	T T	T T	T T	FALSE	New	nucloetide no 49 is A
629	B220	0	0	2	2	G G	A A	T T	N N	N N		TRUE
630	B222	0	0	2	2	G G	G G	C C	T T	T T		TRUE
631	B223	0	0	2	2	G T	A G	T C	T C	T C		TRUE
632	B224	0	0	2	2	N N	N N	N N	T T	T T		TRUE
633	B225	0	0	2	2	N N	N N	N N	T T	T T		TRUE
634	B226	0	0	2	2	N N	A A	T T	T T	T T		TRUE
635	B227	0	0	2	2	G G	A A	T C	T T	T T		TRUE
638	206	0	0	1	2	G G	A A	T T	N N	N N		TRUE
639	247	0	0	1	2	G G	A A	T T	T T	T T		TRUE
640	291	0	0	1	2	G G	A G	T C	T T	T T		TRUE
641	292	0	0	1	2	G G	A G	T C	T T	T T		TRUE
642	474	0	0	1	2	G G	A A	T T	T T	T T		TRUE
643	B228	0	0	2	2	N N	A G	T C	T C	T C	T C	FALSE	Old	nuclotide no 44 is AG
644	B230	0	0	2	2	G T	G G	C C	N N	T T	N N	FALSE	Old	nuclotide between 35 and 36 is A(no G signal), but signal not very good, may be delete it
645	B231	0	0	2	2	G G	A G	T C	T T	T T		TRUE
646	B232	0	0	2	2	G G	A A	T T	T T	T T		TRUE
647	B233	0	0	2	2	G G	A A	T T	T T	T T	T T	FALSE	New	nuclotide no 48 is A
648	B234	0	0	2	2	G T	A G	T C	T T	T T	T T	FALSE	New	nuclotide no 47 is A
649	B235	0	0	2	2	G G	A A	T T	T T	T T		TRUE
650	B236	0	0	2	2	G G	A A	T T	T T	T T		TRUE
651	B237	0	0	0	2	N N	A A	T T	T T	T T		TRUE
652	B238	0	0	2	2	G G	A A	T T	N N	N N		TRUE
653	B239	0	0	2	2	G G	A A	T T	T T	T T	T T	FALSE	New	nucleotide no 47 is A
654	B240	0	0	2	2	G G	A G	T C	T C	T C	T C	FALSE	New	nucleotide no 48 is AG
655	B241	0	0	2	2	G T	G G	C C	T T	T T	T T	FALSE	New	nucleotide no 47 is A
656	B242	0	0	2	2	G G	A A	T T	T T	T T	T T	FALSE	New	nucleotide no 49 is A
657	B243	0	0	2	2	G T	A G	T C	T C	T C		TRUE
658	B244	0	0	2	2	G G	A A	T T	C C	C C	C C	FALSE	New	nuclotide 52 is G
659	B245	0	0	2	2	T T	G G	C C	C C	C C		TRUE
660	B246	0	0	2	2	G G	A A	T T	T T	T T		TRUE
661	B247	0	0	2	2	G G	A A	T T	T T	T T		TRUE
662	B248	0	0	2	2	N N	A G	T C	T T	T T	T T	FALSE	New	nuclotide 45 is A
663	B249	0	0	2	2	G G	A A	T T	T T	T T	T T	FALSE	New	nuclotide 48 is A
664	B250	0	0	2	2	G T	A G	T C	T T	T T	T T	FALSE	New	nuclotide 48 is A
665	B251	0	0	2	2	G T	A G	T C	N N	N N		TRUE
666	B252	0	0	2	2	N N	G G	T C	T T	C C	T T	FALSE	Old	you are right
667	B253	0	0	2	2	G G	A A	T C	T T	T T		TRUE
668	B254	0	0	2	2	G T	A G	T C	T C	T C		TRUE
669	B255	0	0	2	2	G T	A G	C C	T C	T C		TRUE
670	B256	0	0	2	2	G G	A G	T C	T T	T T		TRUE
671	B257	0	0	2	2	G G	A A	T T	T T	T T		TRUE
672	B258	0	0	2	2	G G	A A	C C	T T	T T		TRUE
673	B259	0	0	2	2	N N	N N	T C	T T	T T		TRUE
674	B260	0	0	2	2	G G	A A	T C	T T	T T		TRUE
675	B261	0	0	2	2	G T	A G	T C	T C	T C		TRUE
676	B263	0	0	2	2	G G	A A	T T	T T	T T		TRUE
677	B264	0	0	2	2	G G	A A	T T	T T	T T		TRUE
678	B265	0	0	2	2	G G	A A	T T	T T	T T	T T	FALSE	New	nucleotide no 48 is AA
679	B266	0	0	2	2	G G	A A	T C	T T	T T		TRUE
680	B267	0	0	2	2	G T	G G	C C	T T	T T	T T	FALSE	New	nucleotide no 49 is AA
681	B268	0	0	2	2	G T	A G	T C	N N	N N		TRUE
682	B269	0	0	2	2	G G	A G	T C	T C	T C		TRUE
683	B270	0	0	2	2	G T	A G	T C	T T	T T		TRUE
684	B271	0	0	2	2	G G	A A	T T	T T	T T	T T	FALSE	New	no. 47 is A
685	B272	0	0	2	2	T T	G G	C C	T C	T C	T C	FALSE	New	no. 47 is AG
686	B273	0	0	2	2	G G	A A	T T	T T	T T		TRUE
687	B274	0	0	2	2	G G	A A	T T	T T	T T		TRUE
688	B275	0	0	2	2	G G	A A	T T	T T	T T	T T	FALSE	New	no. 48 is A
689	B276	0	0	2	2	G G	A A	T T	T C	T C	T C	FALSE	New	no. 51 is AG
690	B278	0	0	2	2	N N	A A	T T	T T	T T		TRUE
691	B279	0	0	2	2	G T	A G	T C	T C	T C		TRUE
692	B280	0	0	2	2	N N	G G	C C	T T	T T		TRUE
693	B281	0	0	2	2	G T	A G	T C	N N	N N		TRUE
694	B282	0	0	2	2	G G	A G	C C	N N	N N		TRUE
695	B283	0	0	2	2	G G	A A	T T	T T	T T	T T	FALSE	New	no. 49 is A
696	B284	0	0	2	2	G G	A G	T C	T C	T C		TRUE
697	B285	0	0	2	2	G G	A A	T T	T T	T T		TRUE
698	B286	0	0	2	2	G T	A G	T C	T C	T C		TRUE
699	B287	0	0	0	2	G G	A G	T C	T T	T T		TRUE
700	B288	0	0	2	2	G G	A A	T T	T T	T T		TRUE
701	B289	0	0	2	2	G G	A A	T T	T T	T T		TRUE
702	B290	0	0	2	2	G G	A A	T T	T T	T T		TRUE
703	B292	0	0	2	2	G G	A A	T C	T C	T C	T C	FALSE	New	no. 47 is AG
704	B294	0	0	2	2	G G	A G	T C	N N	T T	N N	FALSE	New	no. 28 and 29 is A( no G signal), may be can delete it
705	B296	0	0	2	2	G G	A A	T T	T T	T T		TRUE
706	B297	0	0	2	2	G G	A A	T T	T T	T T		TRUE
707	B299	0	0	2	2	G G	A G	T C	T C	T C	T C	FALSE	New	no. 48 is AG
708	B301	0	0	2	2	G G	A A	T C	T C	T C		TRUE
709	D1	0	0	1	2	G G	A A	T T	T T	T T		TRUE
710	D10	0	0	1	2	G G	A A	T C	T T	T T		TRUE
711	D11	0	0	1	2	G G	A G	T C	T C	T C		TRUE
712	D12	0	0	1	2	G G	A G	T C	T C	T C		TRUE
713	D13	0	0	1	2	G T	G G	C C	T C	T C		TRUE
714	D16	0	0	1	2	G T	A G	T C	T C	T C		TRUE
715	D17	0	0	1	2	G G	A A	T T	T T	T T		TRUE
716	D19	0	0	1	2	G T	A G	T C	T C	T C		TRUE
717	D20	0	0	1	2	G G	A A	T T	T T	T T		TRUE
718	D32	0	0	1	2	G G	A A	T T	N N	N N		TRUE
719	D34	0	0	1	2	G T	A G	T C	T C	T C		TRUE
720	D35	0	0	1	2	G G	A A	T T	T T	T T		TRUE
721	D36	0	0	1	2	G T	A G	T C	T C	T C		TRUE
722	D4	0	0	1	2	G G	A A	T T	T T	T T		TRUE
723	D6	0	0	2	2	G G	A G	T C	T T	T T		TRUE
724	D8	0	0	2	2	G G	A A	T T	T T	T T		TRUE
725	D9	0	0	1	2	G G	A G	T C	T T	T T		TRUE
726	D100	0	0	1	2	G G	A G	T C	T C	T C		TRUE
727	D101	0	0	1	2	G T	A A	T T	N N	N N		TRUE
728	D102	0	0	1	2	G G	A A	T C	T C	T C		TRUE
729	D104	0	0	1	2	G T	A G	T C	T C	T C		TRUE
730	D105	0	0	1	2	G G	A A	T T	T T	T T		TRUE
731	D106	0	0	1	2	G G	A A	T T	T T	T T		TRUE
732	D108	0	0	1	2	G G	A A	T T	T T	T T		TRUE
733	D109	0	0	1	2	G G	A G	T C	T T	T T		TRUE
734	D114	0	0	1	2	N N	N N	N N	T T	T T		TRUE
735	D116	0	0	1	2	G T	A G	T C	T C	T C		TRUE
736	D118	0	0	1	2	G G	A A	T T	T T	T T		TRUE
737	D120	0	0	1	2	G T	A G	T C	N N	N N		TRUE
738	D121	0	0	1	2	G T	A G	C C	T C	T C		TRUE
739	D123	0	0	1	2	G T	A G	T C	T C	T C		TRUE
740	D37	0	0	1	2	G G	A A	T C	T T	T T		TRUE
741	D40	0	0	0	2	G G	A A	T T	N N	N N	T T	FALSE	New	The signal overlap with no. 50 is not sure is G or noice,
742	D43	0	0	1	2	G G	A A	T T	T T	T T		TRUE
743	D45	0	0	1	2	G G	A A	T C	T T	T T		TRUE
744	D50	0	0	1	2	G G	A A	T T	T T	T T		TRUE
745	D53	0	0	2	2	G G	A A	T T	T T	T T		TRUE
746	D56	0	0	1	2	G G	A A	T C	T T	T T		TRUE
747	D57	0	0	1	2	N N	N N	N N	T T	T T		TRUE
748	D57	0	0	1	2	N N	N N	N N	T T	T T		TRUE
749	D58	0	0	1	2	G G	A G	C C	T T	T T		TRUE
750	D59	0	0	1	2	G G	A A	T C	T T	T T		TRUE
751	D60	0	0	1	2	G G	A A	T T	T T	T T		TRUE
752	D61	0	0	1	2	G G	A G	T C	N N	T T	T T	FALSE	New	The signal overlap with no. 55 is not sure is G or noice,
753	D65	0	0	1	2	G G	A A	T T	T T	T T		TRUE
754	D68	0	0	1	2	G G	A A	T T	T T	T T		TRUE
755	D71	0	0	1	2	G T	A G	T C	N N	N N	N N	FALSE	Old	poor signal, redo or delete it
756	D72	0	0	1	2	G G	A A	T C	T T	T T		TRUE
757	D73	0	0	1	2	G G	A A	T C	T T	T T		TRUE
758	D74	0	0	1	2	G G	A A	T T	T T	T T		TRUE
759	D75	0	0	1	2	G G	A A	T T	T T	T T		TRUE
760	D76	0	0	2	2	G G	A A	T T	T T	T T		TRUE
761	D81	0	0	1	2	G G	G G	C C	T C	T C		TRUE
763	D82	0	0	1	2	G G	A A	T T	T T	T T	T T	TRUE
764	D83	0	0	1	2	G T	A G	T C	T C	T C		TRUE
765	D84	0	0	1	2	N N	A A	T T	T T	T T		TRUE
766	D88	0	0	1	2	G G	A A	T T	T T	T T		TRUE
767	D91	0	0	0	2	G T	G G	C C	T C	N N	T C	FALSE	Old	you are right
768	D96	0	0	1	2	G G	A A	T T	T C	T C		TRUE
769	D98	0	0	1	2	G G	A G	T C	T T	T T		TRUE
770	D99	0	0	1	2	G T	A G	T C	T C	N N	T C	FALSE	Old	you are right
771	KA1	0	0	1	1	G T	A G	N N	T C	T C		TRUE
772	KA10	0	0	1	1	G G	A A	T T	T T	T T		TRUE
773	KA11	0	0	1	1	G T	A G	T C	T C	T C		TRUE
774	KA12	0	0	1	1	G G	A A	T T	T T	T T		TRUE
775	KA13	0	0	1	1	G T	A A	T T	T T	T T		TRUE
776	KA14	0	0	1	1	N N	N N	N N	T C	T C		TRUE
777	KA15	0	0	1	1	G T	A G	T C	T C	T C		TRUE
778	KA16	0	0	1	1	G T	A G	T C	T C	T C		TRUE
779	KA19	0	0	1	1	G G	A A	T C	T T	T T		TRUE
780	KA2	0	0	1	1	N N	N N	N N	T T	T T		TRUE
781	KA20	0	0	1	1	T T	G G	N N	C C	C C		TRUE
782	KA22	0	0	1	1	G G	G G	T C	T T	T T		TRUE
783	KA23	0	0	1	1	G G	G G	T C	T C	T C		TRUE
784	KA24	0	0	1	1	G G	A G	T C	T T	T T		TRUE
785	KA25	0	0	1	1	T T	G G	C C	C C	C C		TRUE
786	KA26	0	0	1	1	G G	A A	T T	T T	T T		TRUE
787	KA27	0	0	1	1	G G	A A	T T	T T	T T		TRUE
788	KA28	0	0	1	1	G G	A G	C C	T T	T T		TRUE
789	KA29	0	0	1	1	G G	A A	T C	T T	T T		TRUE
790	KA30	0	0	1	1	G T	A G	T C	N N	N N		TRUE
791	KA31a	0	0	1	1	G G	A G	T C	T C	T C		TRUE
792	KA31B	0	0	1	1	N N	N N	N N	T C	T C		TRUE
793	KA32	0	0	1	1	G T	A G	N N	N N	N N	C C	FALSE	Old	T signal seem too low for TC, may need to redo or delete it
794	KA34	0	0	1	1	G G	A A	C C	T T	T T		TRUE
795	KA35	0	0	1	1	G G	A A	T T	T T	T T		TRUE
796	KA36	0	0	1	1	G T	A G	C C	T C	N N	T C	FALSE	Old	you are right
797	KA37	0	0	1	1	G G	A A	T C	T T	T T		TRUE
798	KA38	0	0	1	1	G T	A G	C C	T C	T C		TRUE
799	KA39	0	0	1	1	G G	A A	N N	T T	T T		TRUE
800	KA4	0	0	1	1	G G	A A	T T	T T	T T		TRUE
801	KA42	0	0	1	1	G G	A A	T T	T T	T T		TRUE
802	KA43	0	0	1	1	G G	A A	T T	T T	T T		TRUE
803	KA45	0	0	1	1	G T	G G	C C	T C	T C		TRUE
804	KA46b	0	0	0	1	G T	A G	T C	N N	N N		TRUE
805	KA47	0	0	1	1	G G	A A	T T	T T	T T		TRUE
806	KA48	0	0	0	1	N N	A G	T C	T T	N N	T T	FALSE	Old	you are right
807	KA49	0	0	1	1	G G	A A	T T	T T	T T		TRUE
808	KA5	0	0	1	1	G G	A A	T C	T T	T T		TRUE
809	KA50	0	0	1	1	N N	A G	N N	T T	T T		TRUE
810	KA6	0	0	1	1	G G	A A	T C	T T	T T		TRUE
811	KA7	0	0	1	1	T T	G G	C C	C C	C C		TRUE
812	KA8	0	0	1	1	G G	N N	N N	T T	T T		TRUE
813	KA9	0	0	1	1	G G	A G	T C	T T	T T		TRUE
814	KA101	0	0	1	1	G T	A G	T C	T C	T C		TRUE
815	KA102	0	0	1	1	G T	A G	T C	T C	T C		TRUE
816	KA103	0	0	1	1	G G	A A	T T	T T	T T		TRUE
817	KA104	0	0	1	1	G G	A A	T T	T T	T T		TRUE
818	KA105	0	0	1	1	G G	A A	C C	N N	N N		TRUE
819	KA106	0	0	1	1	G T	A G	T C	T C	T C		TRUE
820	KA107	0	0	1	1	G G	A G	T C	T T	T T		TRUE
821	KA108	0	0	1	1	G G	A A	T T	N N	N N		TRUE
822	KA109	0	0	1	1	G G	A A	T T	T T	T T		TRUE
823	KA110	0	0	1	1	G G	A A	T T	T T	T T		TRUE
824	KA111	0	0	1	1	G G	A A	C C	T T	T T		TRUE
825	KA112	0	0	1	1	G G	A G	C C	T T	T T		TRUE
826	KA113a	0	0	1	1	G G	A G	T C	T T	T T		TRUE
827	KA113b	0	0	1	1	G G	A A	T T	T T	T T		TRUE
828	KA114	0	0	1	1	G T	A G	T C	T C	T C		TRUE
829	KA115	0	0	1	1	G G	A G	C C	T T	T T		TRUE
830	KA116	0	0	1	1	G G	A A	T T	T T	T T		TRUE
831	KA118	0	0	1	1	G G	A A	T T	T T	T T		TRUE
832	KA119	0	0	1	1	N N	N N	N N	T T	T T		TRUE
833	KA120	0	0	1	1	G G	N N	T C	T T	T T		TRUE
834	KA121	0	0	1	1	G T	G G	C C	T C	T C		TRUE
835	KA122	0	0	1	1	G T	A G	T C	T C	T C		TRUE
836	KA123	0	0	1	1	G G	A A	T C	T T	T T		TRUE
837	KA124	0	0	1	1	G T	A G	T C	T C	T C		TRUE
838	KA125	0	0	1	1	N N	N N	N N	T T	T T		TRUE
839	KA126	0	0	1	1	G G	A G	T C	T C	T C		TRUE
840	KA127	0	0	1	1	G G	A A	T T	T T	T T		TRUE
841	KA128	0	0	1	1	G G	A A	T T	T T	T T		TRUE
842	KA129	0	0	1	1	G G	A A	T C	T T	T T		TRUE
843	KA130	0	0	1	1	G T	A G	T C	T C	T C		TRUE
844	KA131	0	0	1	1	G T	A G	T C	T C	T C		TRUE
845	KA132	0	0	1	1	G G	A A	T T	T T	T T		TRUE
846	KA133	0	0	1	1	G T	A G	T C	T C	T C		TRUE
847	KA134	0	0	1	1	G G	A A	T T	T T	T T		TRUE
848	KA135	0	0	1	1	G G	A A	T T	T T	T T		TRUE
849	KA136	0	0	1	1	G G	A A	N N	T T	N N	T T	FALSE	Old	you are right
850	KA137	0	0	1	1	G G	A A	T T	T T	T T		TRUE
851	KA138	0	0	1	1	G G	A A	T T	T T	T T		TRUE
852	KA139	0	0	1	1	G G	A G	T C	T T	T T		TRUE
853	KA140	0	0	1	1	N N	N N	N N	T C	T C		TRUE
854	KA141	0	0	1	1	G G	A A	T C	T T	T T		TRUE
855	KA142	0	0	1	1	G T	A G	T C	T C	T C		TRUE
856	KA143	0	0	1	1	G G	A A	C C	T T	T T		TRUE
857	KA145	0	0	1	1	G G	A A	T C	T T	T T		TRUE
858	KA146	0	0	1	1	G T	A G	T C	T C	T C		TRUE
859	KA147	0	0	1	1	G T	A G	T C	T C	T C		TRUE
860	KA148	0	0	1	1	G G	A G	C C	T C	T C		TRUE
861	KA149	0	0	1	1	G T	A G	T C	T C	T C		TRUE
862	KA51	0	0	1	1	G G	A A	T T	T T	T T		TRUE
863	KA52	0	0	1	1	G T	A A	T C	T T	T T		TRUE
864	KA53	0	0	1	1	G G	G G	C C	T C	T C		TRUE
865	KA54	0	0	1	1	G G	A A	T T	T T	T T		TRUE
866	KA55	0	0	1	1	G T	A G	T C	T C	T C		TRUE
867	KA56	0	0	1	1	N N	N N	C C	T C	T C		TRUE
868	KA57	0	0	1	1	N N	A A	N N	T C	T C		TRUE
869	KA58	0	0	1	1	G G	A G	T C	T T	T T		TRUE
870	KA59	0	0	1	1	G G	A A	T T	T T	T T		TRUE
871	KA60	0	0	1	1	G G	A A	T T	T T	T T		TRUE
872	KA61	0	0	1	1	G G	A A	T T	T T	T T		TRUE
873	KA63	0	0	1	1	G G	A A	T T	T T	T T		TRUE
874	KA64	0	0	1	1	G G	A A	T T	T T	T T		TRUE
875	KA65	0	0	1	1	G T	A G	T C	T C	T C		TRUE
876	KA66	0	0	1	1	G T	G G	C C	T C	T C		TRUE
877	KA67	0	0	1	1	G G	A A	T T	T T	T T		TRUE
878	KA68	0	0	1	1	G G	A A	T T	T T	T T		TRUE
879	KA69	0	0	1	1	G G	A G	T C	T C	T C		TRUE
880	KA70	0	0	1	1	G G	A A	T T	T T	T T		TRUE
881	KA71	0	0	1	1	G G	A A	T T	T T	T T		TRUE
882	KA72	0	0	1	1	G T	A G	T C	T C	T C		TRUE
883	KA73	0	0	1	1	G T	A G	N N	T C	T C		TRUE
884	KA74	0	0	1	1	G G	A A	T T	T T	T T		TRUE
885	KA75	0	0	1	1	G G	A A	C C	T C	T C		TRUE
886	KA78	0	0	1	1	G G	A A	C C	T T	T T		TRUE
887	KA79	0	0	1	1	N N	N N	N N	T T	T T		TRUE
888	KA80	0	0	1	1	G G	A A	T C	T T	T T		TRUE
889	KA81	0	0	1	1	G G	A A	T C	T T	T T		TRUE
890	KA82	0	0	1	1	G G	A A	T T	T T	T T		TRUE
891	KA83	0	0	1	1	G G	A G	T C	T C	T C		TRUE
892	KA84	0	0	1	1	N N	N N	N N	T C	T C	T C	TRUE		Seem no problem for this data
893	KA85	0	0	1	1	G G	A A	T C	T T	T T		TRUE
894	KA86	0	0	1	1	G G	A A	T T	T T	T T		TRUE
895	KA87	0	0	1	1	G G	A A	T C	T T	T T		TRUE
896	KA88	0	0	1	1	G G	A G	T C	T C	T C		TRUE
897	KA89	0	0	1	1	G G	A G	C C	T C	T C		TRUE
898	KA90	0	0	1	1	G G	A A	T C	T T	T T		TRUE
899	KA91	0	0	1	1	G G	A A	T C	T T	T T		TRUE
900	KA92	0	0	1	1	N N	N N	N N	T T	N N	T T	FALSE	Old	you are right
901	KA93	0	0	1	1	G G	A G	T C	T C	T C		TRUE
902	KA94	0	0	1	1	G G	A A	T T	T T	T T		TRUE
903	KA95	0	0	1	1	G G	A A	T C	T T	T T		TRUE
904	KA97	0	0	1	1	G G	A A	T T	T T	T T		TRUE
905	KA98	0	0	1	1	G T	A G	T C	T C	T C		TRUE
906	KA150	0	0	1	1	G G	A A	T C	T T	T T		TRUE
907	KA151	0	0	1	1	G T	A G	T C	T C	T C		TRUE
908	KA152	0	0	1	1	G G	A A	T T	T T	T T		TRUE
909	KA153	0	0	1	1	G G	A G	T C	T T	T T		TRUE
910	KA154a	0	0	1	1	G T	A G	T C	T C	T C		TRUE
911	KA154b	0	0	1	1	G T	A G	T C	T C	T C		TRUE
912	KA155	0	0	1	1	N N	A A	T T	T T	T T		TRUE
913	KA156	0	0	1	1	G G	A A	T T	T T	T T		TRUE
914	KA157	0	0	1	1	N N	A A	N N	T T	T T		TRUE
915	KA158	0	0	1	1	N N	A A	T T	T T	T T		TRUE
916	KA160	0	0	1	1	G T	A G	T C	T C	T C		TRUE
917	KA161	0	0	1	1	G G	A A	T T	T T	T T		TRUE
918	KA162	0	0	1	1	G G	A A	T T	T T	T T		TRUE
919	KA163	0	0	1	1	G G	A A	T T	T T	T T		TRUE
920	KA164	0	0	1	1	G T	A G	C C	N N	N N		TRUE
921	KA165	0	0	1	1	G G	A A	T T	T T	T T		TRUE
922	KA166	0	0	1	1	G T	A G	C C	T C	T C		TRUE
923	KA167	0	0	1	1	G T	A G	T C	T C	T C		TRUE
924	KA168	0	0	1	1	G G	G G	C C	C C	C C		TRUE
925	KA169	0	0	1	1	G G	A A	T T	T T	T T		TRUE
926	KA170	0	0	1	1	G T	A G	C C	N N	N N		TRUE
927	KA173	0	0	1	1	G G	A A	T C	T T	T T		TRUE
928	KA174	0	0	1	1	G G	A A	T T	T T	T T		TRUE
929	KA175	0	0	1	1	N N	A G	C C	T C	T C		TRUE
930	KA176	0	0	1	1	G G	A A	T T	T T	T T		TRUE
931	KA177	0	0	1	1	N N	N N	T C	T C	T C		TRUE
932	KA178	0	0	1	1	G T	A G	T C	T C	T C		TRUE
933	KA179	0	0	1	1	G G	A A	T C	T T	T C	T T	FALSE	Old	you are right
934	KA180	0	0	1	1	G G	A A	T T	T T	T T		TRUE
935	KA181	0	0	1	1	G G	A G	T C	T T	N N	C C	FALSE	Old	you are right
936	KA182	0	0	1	1	G G	A A	T T	T T	T T		TRUE
937	KA184	0	0	1	1	N N	A G	T C	T T	T T		TRUE
938	KA185a	0	0	1	1	G G	A A	T T	T T	T T		TRUE
939	KA185b	0	0	1	1	G T	A G	T C	T C	T C		TRUE
940	KA187	0	0	1	1	G G	A A	T T	T T	T T		TRUE
941	KA188	0	0	1	1	N N	A A	T C	T T	T T		TRUE
942	KA189	0	0	1	1	T T	A G	C C	C C	C C		TRUE
943	KA190	0	0	1	1	G G	A A	C C	T T	T T		TRUE
944	KA191	0	0	1	1	G G	A G	T C	T T	T T		TRUE
945	KA192	0	0	1	1	N N	N N	N N	T T	T T		TRUE
946	KA193a	0	0	1	1	G T	G G	C C	T C	T C		TRUE
947	KA193b	0	0	1	1	G G	A G	T C	T T	T T		TRUE
948	KA194	0	0	1	1	N N	A A	T T	T C	T C		TRUE
949	KA195	0	0	1	1	G G	A G	T C	T C	T C		TRUE
950	KA196	0	0	1	1	G G	A A	T C	T T	T T		TRUE
951	KA197	0	0	1	1	G G	A A	T T	T T	T T		TRUE
952	KA199	0	0	1	1	G G	A G	T C	T C	T C		TRUE
953	KA200	0	0	1	1	G T	G G	C C	T C	T C		TRUE
954	KA201	0	0	1	1	G T	A G	T C	T C	T C		TRUE
955	KA747	0	0	1	1	N N	N N	N N	T T	T T		TRUE
956	KB1	0	0	2	1	G G	A A	T C	T T	T T		TRUE
957	KB10	0	0	2	1	G G	A G	T C	C C	C C		TRUE
958	KB11a	0	0	2	1	G T	A G	T C	T C	T C		TRUE
959	KB12	0	0	2	1	G G	A A	T C	T T	T T		TRUE
960	KB13	0	0	2	1	G G	A A	T T	T T	T T		TRUE
961	KB14	0	0	2	1	G G	A A	T T	T T	T T		TRUE
962	KB15	0	0	2	1	G G	A A	T T	T T	T T		TRUE
963	KB16	0	0	2	1	G G	A G	C C	T C	T C		TRUE
964	KB17	0	0	2	1	G G	A A	T C	N N	N N		TRUE
965	KB18	0	0	2	1	G T	A G	T C	T C	T C		TRUE
966	KB19	0	0	2	1	G G	A A	T T	T T	T T		TRUE
967	KB2	0	0	2	1	G G	A A	T C	T T	T T		TRUE
968	KB20	0	0	2	1	G T	A G	T C	T C	T C		TRUE
969	KB21	0	0	2	1	G G	A G	C C	T T	T T		TRUE
970	KB22	0	0	2	1	G G	A A	T T	T T	T T		TRUE
971	KB23	0	0	2	1	G G	A G	T C	T T	T T		TRUE
972	KB24	0	0	2	1	G T	A G	T C	T C	T C		TRUE
973	KB25	0	0	2	1	G G	A A	T C	T T	T T		TRUE
974	KB26	0	0	2	1	G G	A A	T T	T T	T T		TRUE
975	KB27	0	0	2	1	G G	A A	T T	T T	T T		TRUE
976	KB28	0	0	2	1	G G	A A	T T	N N	N N		TRUE
977	KB29	0	0	2	1	G G	A A	T C	T T	T T		TRUE
978	KB3	0	0	2	1	G G	A A	T C	T T	T T		TRUE
979	KB30	0	0	2	1	G T	A G	T C	T C	T C		TRUE
980	KB31	0	0	2	1	G G	A A	T T	T T	T T		TRUE
981	KB4	0	0	2	1	G T	A G	T C	T C	T C		TRUE
982	KB5	0	0	2	1	G T	A G	T C	N N	N N		TRUE
983	KB6	0	0	2	1	G G	A A	T C	T T	T T		TRUE
984	KB7	0	0	2	1	G G	A A	T T	T T	T T		TRUE
985	KB8	0	0	2	1	G T	G G	C C	N N	N N	T C	FALSE	Old	A signal seen too week compare to G, not very sure, better redo or delete it
986	KB9	0	0	2	1	G T	A G	T C	T T	T T		TRUE
987	KN1	0	0	2	1	T T	G G	C C	C C	C C		TRUE
988	KN10	0	0	2	1	G G	A A	T T	N N	N N		TRUE
989	KN11	0	0	2	1	G G	A A	T T	T T	T T		TRUE
990	KN12	0	0	2	1	G G	A A	T C	T T	T T		TRUE
991	KN2	0	0	2	1	G G	A A	T T	T T	T T		TRUE
992	KN4	0	0	2	1	G T	A G	T C	T T	T T		TRUE
993	KN5	0	0	2	1	G G	A G	T C	T C	T C		TRUE
994	KN6	0	0	2	1	G G	A A	T C	T T	T T		TRUE
995	KN7	0	0	2	1	N N	N N	N N	T T	T T		TRUE
996	KN8	0	0	2	1	N N	N N	N N	T T	T T		TRUE
997	KN9	0	0	2	1	G G	A A	N N	N N	N N		TRUE
998	BJCN193	0	0	2	1	G G	A G	T C	C C	C C		TRUE
999	BJCN197	0	0	1	1	G G	A A	T T	T T	T T		TRUE
1000	BJCN204	0	0	2	1	G G	A A	T T	T T	T T		TRUE
1001	BJCN213	0	0	1	1	G G	A A	T T	T T	T T		TRUE
1002	BJCN214	0	0	1	1	G T	G G	C C	T C	T C		TRUE
1003	BJCN221	0	0	1	1	G G	A A	T C	T T	T T		TRUE
1004	BJCN223	0	0	1	1	G T	A G	T C	T C	T C		TRUE
1005	BJCN224	0	0	1	1	G G	A A	T T	T T	T T		TRUE
1006	BJCN235	0	0	2	1	G G	A A	T T	T T	T T		TRUE
1007	BJCN237	0	0	2	1	G G	A A	T T	T T	T T		TRUE
1008	BJCN241	0	0	2	1	G G	A A	T T	T T	T T		TRUE
1009	BJCN266	0	0	2	1	G T	A G	T C	T C	T C		TRUE
1010	BJCN268	0	0	1	1	G T	A G	T C	T C	T C		TRUE
1011	BJCN275	0	0	2	1	G G	A A	T T	T T	T T		TRUE
1012	BJCN280	0	0	1	1	G G	A A	T C	T T	T T		TRUE
1013	BJCN281	0	0	1	1	G G	A G	T C	T T	T T		TRUE
1014	BJCN284	0	0	1	1	G G	A G	T C	T T	T T		TRUE
1015	BJCN285	0	0	2	1	G G	A A	T T	T T	T T		TRUE
1016	BJCN288	0	0	1	1	G G	A A	T C	T T	T T		TRUE
1017	BJCN289	0	0	2	1	G G	A G	T C	T T	T T		TRUE
1018	BJCN292	0	0	1	1	G G	A A	T T	T T	T T		TRUE
1019	BJCN294	0	0	2	1	G G	A A	T C	T T	T T		TRUE
1020	BJCN297	0	0	1	1	G G	A A	T C	T T	T T		TRUE
1021	BJCN299	0	0	2	1	G G	A A	T C	T T	T T		TRUE
1022	BJCN300	0	0	2	1	G T	A G	T C	T C	T C		TRUE
1023	BJCN304	0	0	1	1	G G	A G	T C	T T	T T		TRUE
1024	BJCN305	0	0	2	1	G G	A A	T T	T T	T T		TRUE
1025	BJCN308	0	0	1	1	G G	A A	T C	T T	T T		TRUE
1026	BJCN309	0	0	2	1	G G	A A	T T	T T	T T		TRUE
1027	BJCN310	0	0	1	1	G G	A A	T T	T T	T T		TRUE
1028	BJCN312	0	0	1	1	G G	A G	T C	T T	T T		TRUE
1029	BJCN315	0	0	1	1	G G	A A	T C	T T	T T		TRUE
1030	BJCN317	0	0	2	1	G G	A A	T T	T T	T T		TRUE
1031	BJCN319	0	0	2	1	G G	A A	T T	T T	T T		TRUE
1032	BJCN322	0	0	1	1	G G	A G	N N	T T	T T		TRUE
1033	BJCN324	0	0	1	1	G G	A A	T C	T T	T T		TRUE
1034	BJCN325	0	0	1	1	G G	A G	T C	T C	T C		TRUE
1035	BJCN328	0	0	1	1	G G	A G	T C	T T	T T		TRUE
1036	BJCN338	0	0	2	1	G T	A G	T C	T C	T C		TRUE
1037	BJCN340	0	0	2	1	G G	G G	C C	C C	C C		TRUE
1038	BJCN341	0	0	2	1	G G	A A	T T	T T	T T		TRUE
1039	BJCN342	0	0	1	1	G G	A G	T C	T T	T T		TRUE
1040	BJCN344	0	0	1	1	T T	G G	C C	C C	C C		TRUE
1041	BJCN345	0	0	2	1	G G	A A	T T	T T	T T		TRUE
1042	BJCN346	0	0	1	1	G G	A A	T T	T T	T T		TRUE
1043	BJCN349	0	0	2	1	G G	A A	T T	T T	T T		TRUE
1044	BJCN350	0	0	2	1	G G	A A	T T	T T	T T		TRUE
1045	BJCN353	0	0	2	1	G G	A A	T T	T T	T T		TRUE
1046	BJCN354	0	0	2	1	G G	G G	C C	T C	T C		TRUE
1047	BJCN355	0	0	2	1	G G	A A	T T	T T	T T		TRUE
1048	BJCN359	0	0	1	1	G G	A A	T T	T T	T T		TRUE
1049	BJCN362	0	0	2	1	G T	G G	C C	C C	C C		TRUE
1050	BJCN363	0	0	1	1	G G	G G	C C	T C	T C		TRUE
1051	BJCN368	0	0	2	1	G G	A A	T T	T T	T T		TRUE
1052	BJCN377	0	0	1	1	G T	A G	T C	T C	T C		TRUE
1053	BJCN382	0	0	2	1	G G	A A	T T	T T	T T		TRUE
1054	BJCN388	0	0	1	1	G G	A G	T C	T T	T T		TRUE
1055	BJCN398	0	0	2	1	G G	A A	T T	T T	T T		TRUE
1056	BJCN401	0	0	2	1	G G	A A	T T	T T	T T		TRUE
1057	BJCN407	0	0	2	1	G G	A A	T T	T T	T T		TRUE
1058	BJCN410	0	0	2	1	G T	A G	C C	T C	T C		TRUE
1059	BJCN415	0	0	2	1	G G	A G	T C	T T	T T		TRUE
1060	BJCN417	0	0	2	1	G T	A G	T C	T C	T C		TRUE
1061	BJCN419	0	0	1	1	G G	A A	T C	T T	T T		TRUE
1062	BJCN420	0	0	2	1	G G	A A	T C	N N	N N		TRUE
1063	BJCN421	0	0	2	1	G G	A A	T T	T T	T T		TRUE
1064	BJCN422	0	0	1	1	G G	A A	T C	T T	T T		TRUE
1065	BJCN432	0	0	1	1	G G	A A	T T	T T	T T		TRUE
1066	BJCN434	0	0	2	1	G T	N N	T C	T C	T C		TRUE
1067	BJCN436	0	0	2	1	G G	A A	T T	T T	T T		TRUE
1068	BJCN437	0	0	1	1	G G	N N	T T	T T	T T		TRUE
1069	BJCN440	0	0	1	1	G G	A A	T C	T T	T T		TRUE
1070	BJCN441	0	0	1	1	G T	A G	T C	T C	T C		TRUE
1071	BJCN442	0	0	2	1	G G	A A	T C	T T	T T		TRUE
1072	BJCN444	0	0	2	1	G G	A A	T T	T T	T T		TRUE
1073	BJCN447	0	0	1	1	G T	N N	N N	T C	T C		TRUE
1074	BJCN448	0	0	2	1	G G	A A	T T	T T	T T		TRUE
1075	BJCN449	0	0	2	1	G T	A G	C C	T C	T C		TRUE
1076	BJCN450	0	0	1	1	G G	A A	T T	T T	T T		TRUE
1077	BJCN451	0	0	2	1	G T	G G	C C	T C	T C		TRUE
1078	BJCN452	0	0	1	1	G G	A G	T C	T T	T T		TRUE
1079	BJCN453	0	0	2	1	G T	A G	T C	T C	T C		TRUE
1080	BJCN454	0	0	1	1	G T	A G	T C	T C	T C		TRUE
1081	BJCN456	0	0	2	1	G G	A G	T C	T T	T T		TRUE
1082	BJCN457	0	0	2	1	G T	A G	T C	T C	T C		TRUE
1083	BJCN458	0	0	1	1	G T	A G	T C	T C	T C		TRUE
1084	BJCN459	0	0	2	1	G G	A A	T C	T T	T T		TRUE
1085	BJCN462	0	0	1	1	G T	A G	T C	T C	T C		TRUE
1086	BJCN463	0	0	2	1	G T	A G	T C	T C	T C		TRUE
1087	BJCN464	0	0	2	1	G G	A A	C C	T T	T T		TRUE
1088	BJCN466	0	0	2	1	G G	A G	C C	T T	T T		TRUE
1089	BJCN467	0	0	2	1	G T	N N	T T	T C	T C		TRUE
1090	BJCN468	0	0	1	1	G G	A A	T T	T T	T T		TRUE
1091	BJCN469	0	0	1	1	G G	A A	T C	T T	T T		TRUE
1092	BJCN471	0	0	1	1	G T	A G	T C	T C	T C		TRUE
1093	BJCN472	0	0	1	1	G G	A G	T C	T T	T T		TRUE
1094	BJCN473	0	0	2	1	G G	A A	T C	T T	T T		TRUE
1095	BJCN474	0	0	2	1	G G	A A	T T	T T	T T		TRUE
1096	BJCN475	0	0	1	1	G G	A G	T C	T T	T T		TRUE
1097	BJCN476	0	0	2	1	G G	A A	T T	T T	T T		TRUE
1098	BJCN477	0	0	1	1	G G	A A	T T	T T	T T		TRUE
1099	BJCN478	0	0	2	1	G G	A A	T T	T T	T T		TRUE
1100	BJCN479	0	0	1	1	G G	A A	T T	T T	T T		TRUE
1101	BJCN481	0	0	2	1	G G	A A	T T	T T	T T		TRUE
1102	BJCN482	0	0	1	1	G G	A A	T C	T T	T T		TRUE
1103	BJCN483	0	0	2	1	G G	A A	C C	T T	T T		TRUE
1104	BJCN484	0	0	1	1	G G	A G	T C	T T	T T		TRUE
1105	BJCN485	0	0	1	1	G G	A A	T C	T T	T T		TRUE
1106	BJCN486	0	0	2	1	G G	A G	T C	T T	T T		TRUE
1107	BJCN487	0	0	2	1	G G	A G	T C	T C	T C		TRUE
1108	BJCN488	0	0	2	1	G T	A G	C C	T C	T C		TRUE
1109	BJCN489	0	0	2	1	G T	A G	T C	T C	T C		TRUE
1110	BJCN490	0	0	2	1	G G	A G	T C	T T	T T		TRUE
1111	BJCN491	0	0	1	1	G G	A A	T T	T T	T T		TRUE
1112	BJCN492	0	0	1	1	G G	A A	T T	T T	T T		TRUE
1113	BJCN493	0	0	1	1	G T	A G	C C	T C	T C		TRUE
1114	BJCN494	0	0	2	1	G G	A A	T C	T T	T T		TRUE
1115	BJCN601	0	0	2	1	G G	A G	T C	T T	T T		TRUE
1116	BJCN602	0	0	2	1	G G	A A	T C	T T	T T		TRUE
1117	BJCN603	0	0	2	1	G G	A A	T C	T T	T T		TRUE
1118	BJCN604	0	0	2	1	G G	A A	T C	T T	T T		TRUE
1119	BJCN605	0	0	2	1	G G	A A	T C	T T	T T		TRUE
1120	BJCN606	0	0	2	1	G G	A G	T C	T T	T T		TRUE
1121	BJCN607	0	0	2	1	G G	A A	T T	T T	T T		TRUE
1122	BJCN608	0	0	1	1	G G	A A	T T	T T	T T		TRUE
1123	BJCN609	0	0	1	1	G T	G G	C C	T C	T C		TRUE
1124	BJCN611	0	0	2	1	G G	A A	T T	T C	T C		TRUE
1125	BJCN612	0	0	1	1	G G	A A	T T	T T	T T		TRUE
1126	BJCN613	0	0	1	1	G G	A A	C C	T T	T T		TRUE
1127	BJCN614	0	0	1	1	G T	A G	T C	T C	T C		TRUE
1128	BJCN615	0	0	2	1	G G	A A	T T	T T	T T		TRUE
1129	BJCN616	0	0	1	1	G G	A A	T C	T T	T T		TRUE
1130	BJCN617	0	0	1	1	G G	A A	T T	T T	T T		TRUE
1131	BJCN619	0	0	2	1	G G	A A	T C	T T	T T		TRUE
1132	BJCN620	0	0	1	1	G G	A G	T C	T T	T T		TRUE
1133	BJCN621	0	0	1	1	G G	A A	T T	N N	N N		TRUE
1134	BJCN622	0	0	2	1	G G	A A	T T	T T	T T		TRUE
1135	BJCN623	0	0	2	1	G G	A G	T C	T T	T T		TRUE
1136	BJCN624	0	0	1	1	G G	A A	T T	T T	T T		TRUE
1137	BJCN626	0	0	1	1	G G	A A	T T	T T	T T		TRUE
1138	BJCN627	0	0	2	1	G G	A A	T T	T T	T T		TRUE
1139	BJCN628	0	0	2	1	G T	G G	C C	C C	C C		TRUE
1140	BJCN629	0	0	2	1	G G	A A	T T	T T	T T		TRUE
1141	BJCN630	0	0	2	1	G G	A A	T T	T T	T T		TRUE
1142	BJCN631	0	0	2	1	G G	A A	T T	T T	T T		TRUE
1143	BJCN632	0	0	2	1	G T	A G	C C	T C	T C		TRUE
1144	BJCN633	0	0	2	1	G T	A G	T C	T C	T C		TRUE
1145	BJCN634	0	0	2	1	G G	A A	T T	T T	T T		TRUE
1146	BJCN635	0	0	2	1	G G	A A	T T	T T	T T		TRUE
1147	BJCN636	0	0	1	1	G T	A G	T C	T C	T C		TRUE
1148	BJCN637	0	0	2	1	G G	A G	C C	T T	T T		TRUE
1149	BJCN638	0	0	2	1	G G	A A	T T	T T	T T		TRUE
1150	BJCN639	0	0	2	1	G G	A A	T T	T T	T T		TRUE
1151	BJCN640	0	0	1	1	G G	A A	T C	T T	T T		TRUE
1152	BJCN641	0	0	2	1	G G	A A	T T	T T	T T		TRUE
1153	BJCN642	0	0	2	1	G T	G G	C C	T C	T C		TRUE
1154	BJCN643	0	0	1	1	G G	A A	T C	T T	T T		TRUE
1155	BJCN644	0	0	1	1	G G	A A	T C	T C	T C		TRUE
1156	BJCN645	0	0	1	1	G G	A A	T T	T T	T T		TRUE
1157	BJCN646	0	0	1	1	G G	A A	T C	T T	T T		TRUE
1158	BJCN647	0	0	1	1	G T	A G	C C	T C	T C		TRUE
1159	BJCN648	0	0	2	1	G G	A A	T T	T T	T T		TRUE
1160	BJCN649	0	0	2	1	G G	A A	T T	T T	T T		TRUE
1161	BJCN651	0	0	2	1	G G	A A	T T	T T	T T		TRUE
1162	BJCN652	0	0	2	1	G T	A G	T C	C C	C C		TRUE
1163	BJCN653	0	0	1	1	G T	A G	T C	T C	T C		TRUE
1164	BJCN654	0	0	1	1	G G	A G	T C	T T	T T		TRUE
1165	BJCN655	0	0	2	1	G G	A A	T T	T T	T T		TRUE
1166	BJCN657	0	0	2	1	G G	A A	T T	T T	T T		TRUE
1167	BJCN658	0	0	2	1	G G	A G	T C	T T	T T		TRUE
1168	BJCN659	0	0	1	1	G G	A A	T T	T T	T T		TRUE
1169	BJCN660	0	0	1	1	G T	G G	C C	T T	T T		TRUE
1170	BJCN661	0	0	1	1	G G	A A	T T	T T	T T		TRUE
1171	BJCN662	0	0	1	1	G G	A A	T C	T T	T T		TRUE
1172	BJCN663	0	0	2	1	G G	A A	T T	T T	T T		TRUE
1173	BJCN664	0	0	2	1	G G	A A	T T	T T	T T		TRUE
1174	BJCN665	0	0	1	1	G G	A G	T C	T T	T T		TRUE
1175	BJCN666	0	0	2	1	G T	A G	C C	T C	T C		TRUE
1176	BJCN667	0	0	1	1	G G	A A	T C	T T	T T		TRUE
1177	BJCN668	0	0	1	1	G G	A G	C C	T T	T T		TRUE
1178	BJCN669	0	0	2	1	G G	A A	T C	T T	T T		TRUE
1179	BJCN670	0	0	1	1	G T	A G	T C	T C	T C		TRUE
1180	BJCN671	0	0	1	1	G G	A A	T T	T T	T T		TRUE
1181	BJCN672	0	0	1	1	G G	A G	T C	T T	T T		TRUE
1182	BJCN674	0	0	1	1	G T	G G	C C	T C	T C		TRUE
1183	BJCN675	0	0	1	1	G G	A A	T T	T T	T T		TRUE
1184	BJCN676	0	0	1	1	G T	A G	T C	T C	T C		TRUE
1185	BJCN677	0	0	2	1	G T	G G	C C	C C	C C		TRUE
1186	BJCN678	0	0	2	1	G G	A A	T T	T T	T T		TRUE
1187	BJCN679	0	0	2	1	G G	A A	T C	T T	T T		TRUE
1188	BJCN680	0	0	2	1	G G	G G	C C	T T	T T		TRUE
1189	BJCN681	0	0	2	1	G T	A G	T C	T C	T C		TRUE
1190	BJCN682	0	0	1	1	G G	A G	T C	T C	T C		TRUE
1191	BJCN683	0	0	1	1	G T	A G	C C	T C	T C		TRUE
1192	BJCN684	0	0	2	1	G G	A A	T T	T T	T T		TRUE
1193	BJCN685	0	0	2	1	G G	A A	T C	T T	T T		TRUE
1194	BJCN686	0	0	2	1	G G	A A	T T	T T	T T		TRUE
1195	BJCN687	0	0	2	1	G G	A A	T T	T T	T T		TRUE
1196	BJCN689	0	0	1	1	G T	A G	T C	T C	T C		TRUE
1197	BJCN690	0	0	1	1	G T	A G	T C	T C	T C		TRUE
1198	BJCN691	0	0	2	1	G G	A A	T T	T T	T T		TRUE
1199	BJCN692	0	0	2	1	G T	A G	T C	T C	T C		TRUE
1200	BJCN694	0	0	2	1	G G	A A	T T	T T	T T		TRUE
1201	BJCN695	0	0	1	1	G T	A G	T C	T C	T C		TRUE
1202	BJCN696	0	0	1	1	G G	A G	T C	T C	T C		TRUE
1203	BJCN697	0	0	1	1	G G	A A	T T	T T	T T		TRUE
1204	BJCN698	0	0	1	1	G G	A A	T T	T T	T T		TRUE
1205	BJCN699	0	0	1	1	G G	A G	C C	T T	T T		TRUE
1206	BJCN700	0	0	1	1	T T	G G	C C	C C	C C		TRUE
1207	BJCN701	0	0	1	1	G G	A A	T T	T T	T T		TRUE
1208	BJCN702	0	0	2	1	G T	A G	C C	T C	T C		TRUE
1209	BJCN703	0	0	2	1	G G	A G	T C	T T	T T		TRUE
1210	BJCN704	0	0	2	1	G G	A A	T T	T T	T T		TRUE
1211	BJCN705	0	0	2	1	G G	A A	T T	T T	T T		TRUE
1212	BJCN706	0	0	1	1	G T	A G	C C	T C	T C		TRUE
1213	BJCN707	0	0	1	1	G G	G G	C C	T T	T T		TRUE
1214	BJCN709	0	0	2	1	G G	A A	C C	T T	T T		TRUE
1215	BJCN710	0	0	2	1	G T	A G	T C	T C	T C		TRUE
1216	BJCN711	0	0	1	1	G G	A G	T C	T T	T T		TRUE
1217	BJCN712	0	0	1	1	G T	A G	T C	T C	T C		TRUE
1218	BJCN713	0	0	1	1	G G	A A	T T	T T	T T		TRUE
1219	BJCN714	0	0	2	1	G G	A A	T C	T T	T T		TRUE
1220	BJCN715	0	0	2	1	G G	A A	T T	T T	T T		TRUE
1221	BJCN716	0	0	1	1	G G	A G	C C	T T	T T		TRUE
1222	BJCN717	0	0	1	1	G G	A A	T T	T T	T T		TRUE
1223	BJCN718	0	0	2	1	G G	A G	T C	T C	T C		TRUE
1224	BJCN719	0	0	1	1	G G	A G	T C	T T	T T		TRUE
1225	BJCN720	0	0	2	1	G G	A A	T C	T T	T T		TRUE
1226	BJCN721	0	0	1	1	G T	A G	C C	T C	T C		TRUE
1227	BJCN722	0	0	1	1	G G	A A	T C	T T	T T		TRUE
1228	BJCN723	0	0	1	1	G T	A G	T C	T C	T C		TRUE
1229	BJCN724	0	0	1	1	G T	G G	C C	T C	T C		TRUE
1230	BJCN725	0	0	2	1	G T	A G	T C	T C	T C		TRUE
1231	BJCN726	0	0	1	1	G T	A G	T C	T C	T C		TRUE
1232	BJCN727	0	0	1	1	G T	A G	T C	T C	T C		TRUE
1233	BJCN728	0	0	1	1	G T	A G	T C	T C	T C		TRUE
1234	BJCN729	0	0	2	1	G T	G G	C C	T C	T C		TRUE
1235	BJCN730	0	0	1	1	G G	A A	T C	T T	T T		TRUE
1236	BJCN731	0	0	1	1	G T	A G	T C	T C	T C		TRUE
1237	BJCN732	0	0	2	1	G G	A A	T C	T T	T T		TRUE
1238	BJCN733	0	0	2	1	G T	A G	T C	T C	T C		TRUE
1239	BJCN734	0	0	1	1	G G	A A	T C	T T	T T		TRUE
1240	BJCN735	0	0	2	1	G T	A G	T C	T C	T C		TRUE
1241	BJCN736	0	0	1	1	G G	A G	T C	T T	T T		TRUE
1242	BJCN737	0	0	2	1	G G	A A	T T	T T	T T		TRUE
1243	BJCN738	0	0	1	1	G T	A G	T C	T C	T C		TRUE
1244	BJCN739	0	0	2	1	G G	A A	C C	T T	T T		TRUE
1245	BJCN740	0	0	2	1	G G	A G	T C	T T	T T		TRUE
1246	BJCN742	0	0	1	1	G G	A A	T C	T T	T T		TRUE
1247	BJCN743	0	0	2	1	G G	G G	C C	C C	C C		TRUE
1248	BJCN744	0	0	2	1	G T	A G	T C	T C	T C		TRUE
1249	BJCN745	0	0	2	1	G G	A G	T C	T T	T T		TRUE
1250	BJCN746	0	0	1	1	T T	G G	C C	C C	C C		TRUE
1251	BJCN747	0	0	1	1	G G	A A	T T	T T	T T		TRUE
1252	BJCN748	0	0	2	1	G G	A A	T T	T T	T T		TRUE
1253	BJCN749	0	0	2	1	G T	A G	C C	T C	T C		TRUE
1254	BJCN750	0	0	2	1	G G	A A	T T	T T	T T		TRUE
1255	BJCN751	0	0	2	1	G G	A A	T T	T T	T T		TRUE
1256	BJCN752	0	0	2	1	G G	A A	T T	T T	T T		TRUE
1257	BJCN753	0	0	2	1	G T	A G	T C	T C	T C		TRUE
1258	BJCN754	0	0	2	1	G G	A G	T C	T T	T T		TRUE
1259	BJCN755	0	0	2	1	G G	A A	T T	T T	T T		TRUE
1260	BJCN757	0	0	1	1	G G	A A	T T	T T	T T		TRUE
1261	BJCN758	0	0	1	1	T T	G G	C C	C C	C C		TRUE
1262	BJCN760	0	0	1	1	G G	A A	T C	T T	T T		TRUE
1263	BJCN761	0	0	1	1	G T	A G	T C	T C	T C		TRUE
1264	BJCN762	0	0	1	1	G T	A G	C C	T C	T C		TRUE
1265	BJCN763	0	0	1	1	G T	A G	T C	T C	T C		TRUE
1266	BJCN764	0	0	1	1	T T	G G	C C	C C	C C		TRUE
1267	BJCN766	0	0	1	1	G G	A A	T C	T T	T T		TRUE
1268	BJCN767	0	0	2	1	G G	A A	T T	T T	T T		TRUE
1269	BJCN768	0	0	1	1	G T	A G	T C	T C	T C		TRUE
1270	BJCN769	0	0	2	1	G G	A A	T T	T T	T T		TRUE
1271	BJCN770	0	0	2	1	G G	A G	T C	T C	T C		TRUE
1272	BJCN771	0	0	2	1	G G	A A	T T	T T	T T		TRUE
1273	BJCN772	0	0	2	1	G T	A G	T C	T C	T C		TRUE
1274	BJCN773	0	0	2	1	G G	A A	T T	T T	T T		TRUE
1275	BJCN774	0	0	2	1	G G	A A	T T	T T	T T		TRUE
1276	BJCN775	0	0	1	1	G T	A G	T C	T C	T C		TRUE
1277	BJCN776	0	0	2	1	G G	A A	T T	T T	T T		TRUE
1278	BJCN777	0	0	1	1	G T	A G	T C	T C	T C		TRUE
1279	BJCN778	0	0	1	1	G G	A G	T C	T T	T T		TRUE
1280	BJCN779	0	0	2	1	G T	A G	T C	T C	T C		TRUE
1281	BJCN780	0	0	1	1	G G	A A	T C	T T	T T		TRUE
1282	BJCN781	0	0	1	1	G G	A A	T C	T T	T T		TRUE
1283	BJCN782	0	0	2	1	G T	A G	T C	T C	T C		TRUE
1284	BJCN783	0	0	2	1	G G	A A	T C	T T	T T		TRUE
1285	BJCN784	0	0	2	1	G G	A A	T T	T T	T T		TRUE
1286	BJCN785	0	0	2	1	G G	A G	T C	T C	T C		TRUE
1287	BJCN786	0	0	2	1	G G	A G	T C	T C	T C		TRUE
1288	BJCN787	0	0	2	1	G G	A A	T T	T T	T T		TRUE
1289	BJCN788	0	0	2	1	G T	G G	C C	C C	C C		TRUE
1290	BJCN789	0	0	1	1	G G	A A	C C	T T	T T		TRUE
1291	BJCN790	0	0	2	1	G G	A A	T T	T T	T T		TRUE
1292	BJCN791	0	0	2	1	G G	A A	T C	T T	T T		TRUE
1293	BJCN792	0	0	2	1	G G	A A	T T	T T	T T		TRUE
1294	BJCN794	0	0	1	1	G T	A G	T C	T C	T C		TRUE
1295	BJCN795	0	0	1	1	G G	A A	T T	T T	T T		TRUE
1296	BJCN796	0	0	2	1	G G	A A	T T	T T	T T		TRUE
1297	BJCN797	0	0	1	1	G T	A G	T C	T C	T C		TRUE
1298	BJCN798	0	0	1	1	G G	A A	T T	T T	T T		TRUE
1299	BJCN799	0	0	1	1	G G	A A	T C	T T	T T		TRUE
1300	BJCN800	0	0	2	1	G T	A G	T C	T C	T C		TRUE
1301	BJCN801	0	0	1	1	G T	A G	T C	T C	T C		TRUE
1302	BJCN802	0	0	1	1	G T	G G	C C	T C	T C		TRUE
1303	BJCN803	0	0	1	1	G T	A G	T C	T C	T C		TRUE
1304	BJCN804	0	0	2	1	G G	A G	C C	N N	N N		TRUE
1305	BJCN805	0	0	2	1	G G	A A	T T	T T	T T		TRUE
1306	BJCN806	0	0	2	1	G T	A G	T C	T C	T C		TRUE
1307	BJCN807	0	0	1	1	G G	A A	T C	T T	T T		TRUE
1308	BJCN808	0	0	1	1	G T	G G	C C	T C	T C		TRUE
1309	BJCN809	0	0	2	1	G T	A G	T C	T T	T T		TRUE
1310	BJCN810	0	0	2	1	G T	A G	T C	T T	T T		TRUE
1311	BJCN811	0	0	2	1	G T	A G	T C	T T	T T		TRUE
1312	BJCN812	0	0	1	1	G G	A A	T T	T T	T T		TRUE
1313	BJCN813	0	0	1	1	G G	A A	T C	T C	T C		TRUE
1314	BJCN815	0	0	2	1	G G	N N	T C	T T	T T		TRUE
1315	BJCN816	0	0	2	1	G G	A A	T C	T C	T C		TRUE
1316	BJCN817	0	0	2	1	G G	A A	T T	T T	T T		TRUE
1317	BJCN820	0	0	2	1	G G	A G	C C	T T	T T		TRUE
1318	BJCN821	0	0	1	1	G T	A G	C C	T C	T C		TRUE
1319	BJCN822	0	0	2	1	G T	A G	T C	T C	T C		TRUE
1320	BJCN823	0	0	2	1	G G	A A	T T	T T	T T		TRUE
1321	BJCN824	0	0	1	1	G T	A G	T C	T C	T C		TRUE
1322	BJCN825	0	0	2	1	G G	A G	C C	T C	T C		TRUE
1323	BJCN827	0	0	2	1	G T	A G	T C	T C	T C		TRUE

## Sheet: Removed genotype
SubID
217
B46
B131
172
216
45
291
